# Supplementary material
Source: PubMed Central journal article supplement (PMC4837466)
Supplement: NIHMS689149-supplement.pdf [file NIHMS689149-supplement.pdf]

# **Influence of linker length in Shape Recognition of B\* DNA by Dimeric Aminoglycosides (Supporting Information)**

Sunil Kumar,<sup>a†</sup> Meredith Newby Spano,<sup>b</sup> and Dev P. Arya <sup>a\*</sup>

<sup>a</sup> Laboratory of Medicinal Chemistry, Department of Chemistry, Clemson University, Clemson, South Carolina 29634

<sup>b</sup> NUBAD, LLC, 900 B West Faris Road, Greenville, South Carolina 29605

† Current Address: Department of Molecular Biophysics and Biochemistry, Yale University, New Haven, CT 06520.

|                                                                        |       |
|------------------------------------------------------------------------|-------|
| 1. Procedure for the synthesis of neomycin dimers.....                 | 3-6   |
| 2. Characterization of neomycin dimers .....                           | 7-93  |
| 3. ITC profile of neomycin and neomycin dimers with AT DNA.....        | 94-99 |
| 4. FID derived AC50 of neomycin based ligands towards AT rich DNA..... | 100   |

## Procedure for the synthesis of neomycin dimers

### Synthesis of linkers (diisothiocyanate from diamine)

To a solution of diamine (0.20 mmol) in dichloromethane (anhydrous, 5 mL), 1,10-Thiocarbonyldi-2(1H)-pyridone (0.22 mmol, 2.2 equiv.) was added and the reaction started with constant stirring in inert atmosphere. The progress of the reaction was monitored by TLC. Flash chromatography (in dichloromethane) afforded the desired product as colorless oil (see Table S1 for % yields).

### Synthesis of *N*-Boc protected neomycin dimers

To a solution of neomycin-boc-5''-amine (1 or 2) (0.05 mmol) in dry pyridine (5 mL), DMAP (cat. amount) was added followed by diisothiocyanate/diisocyanate linker (0.025 mmol, 0.50 eq) and the reaction started under inert atm. The reaction mixture stirred at r.t. for 15 h in the atmosphere of argon. The progress of the reaction was monitored by TLC. The volatiles were removed on rotovap. Purification by flash column chromatography [0 to 10 % ethanol in CH<sub>2</sub>Cl<sub>2</sub> (v/v)] afforded the desired product as a white solid (% yields are reported for individual compounds in table). [*R*<sub>f</sub> 0.38-0.46, 10 % ethanol in CH<sub>2</sub>Cl<sub>2</sub> (v/v)].

### Deprotection of *N*-Boc protected neomycin dimers

To a solution of neomycin dimer (0.012 mmol) in dioxane (3 mL), 4 M HCl/dioxane (1 mL) was added and the reaction started at room temperature. There is a formation of white precipitate after 15 min. The reaction mixture was centrifuged and the solid was collected. The solid was washed with a solution of diethyl ether/hexane [3 × 5 mL, 1:1 (v/v)]. The solid was dissolved in water and lyophilized to afford the desired product as a white powder (% yields are reported for individual compounds in table).

| Linker                                                                                | % yield |
|---------------------------------------------------------------------------------------|---------|
| <chem>SCNCCCCNCS</chem>                                                               | 96.2    |
| <chem>SCNCCCCCCNCS</chem>                                                             | 97.4    |
| <chem>SCNCCOCCOCCNCS</chem>                                                           | 95.8    |
| <chem>SCNCCCOCCOCCNCS</chem>                                                          | 95.5    |
| <b>Table S1.</b> % yields of the diisothiocyanate linkers synthesized from diammines. |         |

| Neomycin Dimer | Linker length | % yield |
|----------------|---------------|---------|
| DPA71          | 1             | 66.2    |
| DPA72          | 7             | 61.7    |
| DPA73          | 7             | 65.0    |
| DPA74          | 8             | 61.2    |
| DPA75          | 10            | 61.5    |
| DPA76          | 14            | 60.4    |
| DPA77          | 16            | 69.2    |
| DPA78          | 16            | 68.0    |
| DPA79          | 18            | 66.3    |
| DPA80          | 22            | 67.2    |
| DPA311         | 17            | 70.1    |
| DPA312         | 19            | 70.7    |
| DPA313         | 20            | 69.8    |

**Table S2.** Overall % yields of the neomycin dimers from two steps (N-boc protected and deprotected).

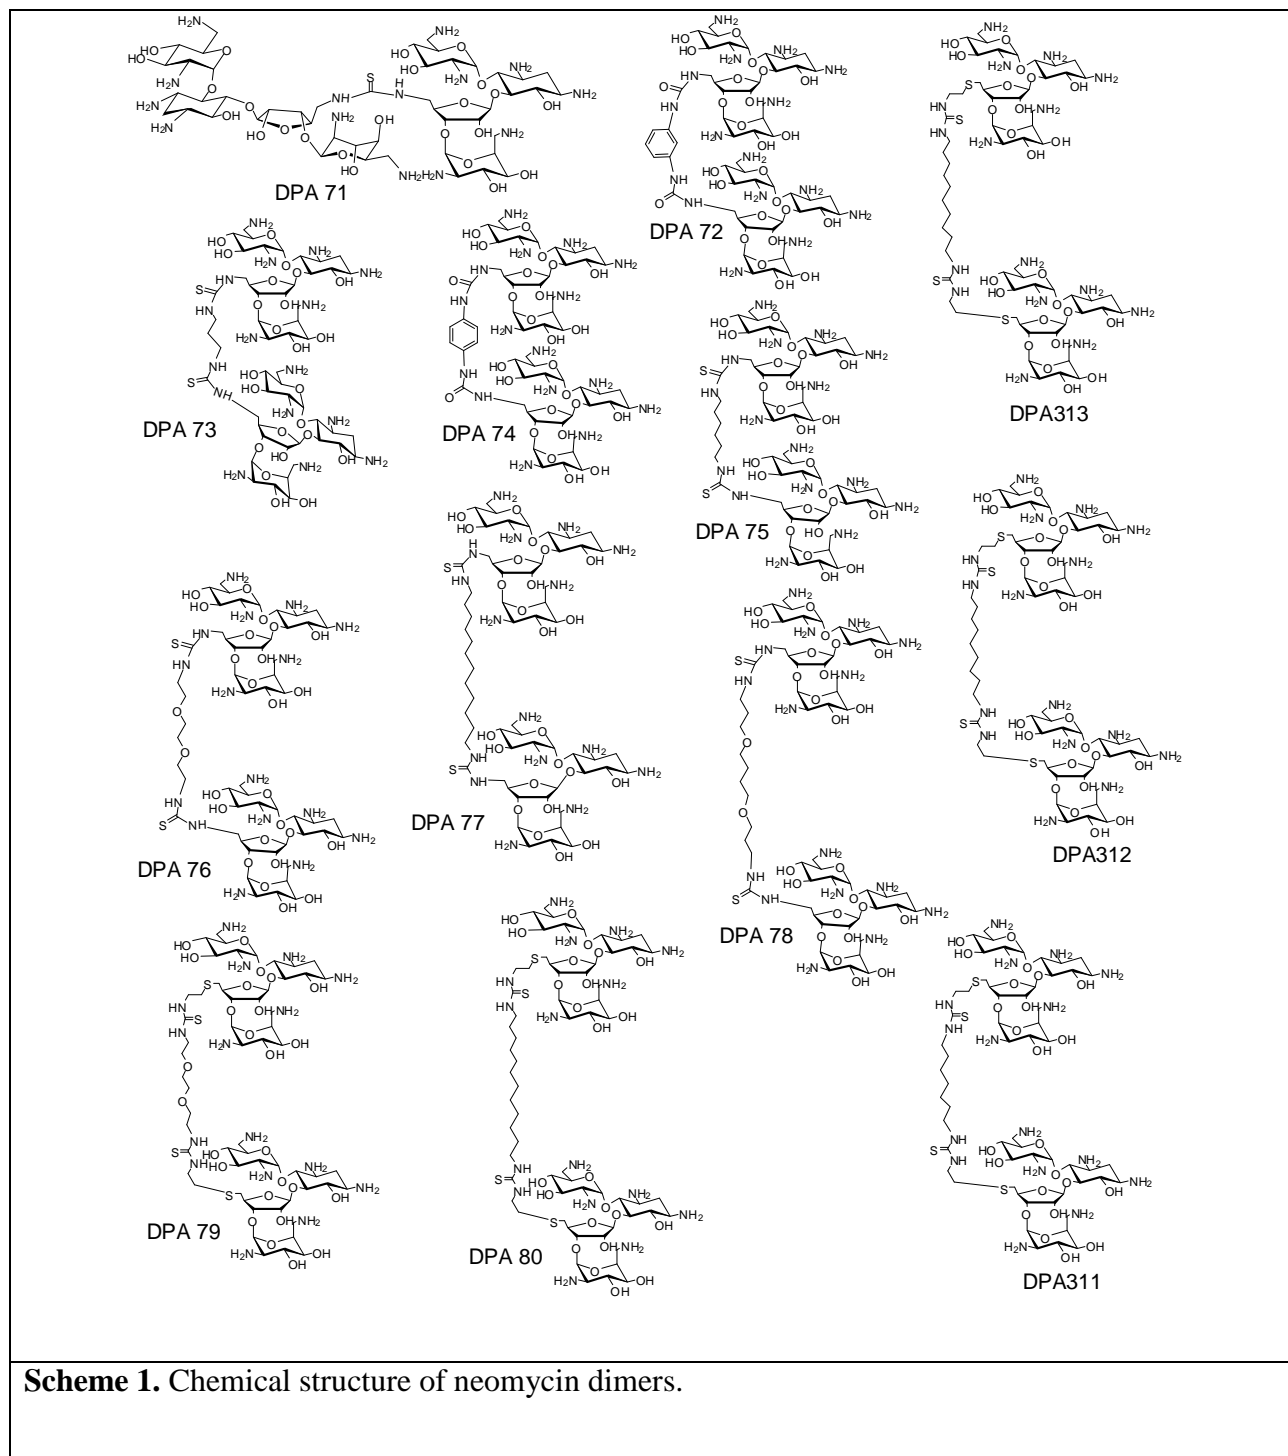

## Characterization of neomycin dimers

### Synthesis of Hexa-*N*-Boc deoxy-neomycin-5''-isothiocyanate

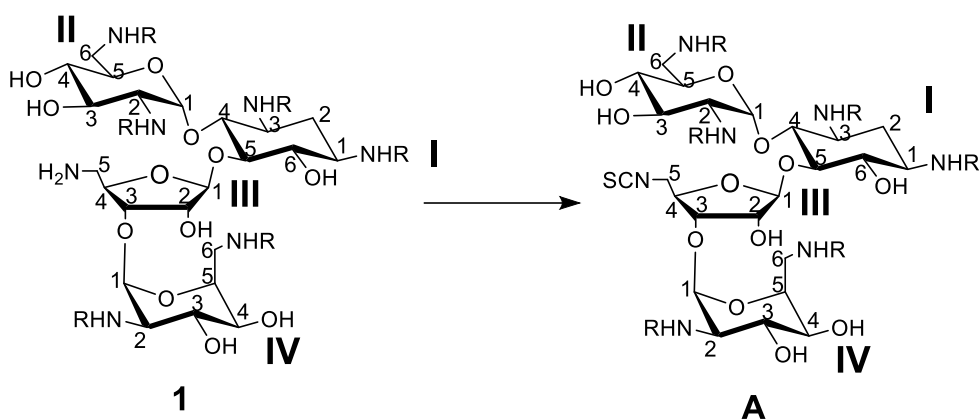

To a solution of  
Hexa-*N*-Boc  
deoxy-  
neomycin-5''-  
amine (1) (30.0  
mg, 24.0  $\mu$ mol)

in dry DCM (3.0 mL), DMAP (cat. amount) was added followed by the addition of TCDP (8.4 mg, 36.0  $\mu$ mol) and the reaction started with constant stirring at r.t. in the atmosphere of argon gas. The reaction ran for 12 h. The progress of the reaction was monitored by TLC. The solvents were removed on evaporater. Flash column chromatography [0 to 10 % EtOH in DCM (v/v)] yields an off white powder (24.55 mg, 80 %). [ $R_f$  0.62, 10 % EtOH in DCM (v/v)]; IR (KBr,  $\text{cm}^{-1}$ ) 2980, 2910, 2105 (NCS), 1701, 1510;  $^1\text{H}$  NMR (500 MHz,  $\text{CD}_3\text{COCD}_3$ )  $\delta$  6.41 (t,  $J = 5.36$  Hz, 1 H,  $\text{NH}_{6\text{IV}}$ ), 6.25-6.33 (m, 1 H,  $\text{NH}_{1\text{I}}$  or  $\text{NH}_{6\text{II}}$ ), 6.12 (d,  $J = 7.72$  Hz, 1 H,  $\text{NH}_{1\text{I}}$  or  $\text{NH}_{6\text{II}}$ ), 5.94-6.12 (m, 3 H,  $\text{NH}_{3\text{I}}$ ,  $\text{NH}_{2\text{IV}}$ ,  $\text{NH}_{2\text{II}}$ ), 5.23-5.25 (m, 2 H), 5.27-5.31 (m, 2 H), 4.85-4.95 (m, 1 H), 4.48 (m, 1 H), 4.42 (m, 1 H), 4.31 (t,  $J = 5.05$  Hz, 1 H), 4.22-4.27 (m, 1 H), 4.12 (q,  $J = 4.73$  Hz, 1 H), 3.99-4.08 (m, 2 H), 3.89-3.97 (m, 1 H), 3.74-3.88 (m, 4 H), 3.52-3.74 (m, 9 H), 3.40-3.52 (m, 4 H), 3.16-3.35 (m, 4 H), 1.35-1.65 (m, 56 H,  $\text{H}_{2\text{Iax}}$ ,  $6 \times \text{Boc}$ ). MS MALDI-TOF calcd. for  $\text{C}_{54}\text{H}_{93}\text{N}_7\text{O}_{24}$  ( $\text{M}+\text{Na}^+$ ), 1277.60, obsd: 1276.55.

### Synthesis of *N*-Boc DPA71.





3.40-3.50 (m, 6 H), 3.15-3.26 (m, 6 H), 1.50-1.60 (m, 2 H, H<sub>2</sub>lax), 1.35-1.50 (m, 108 H, 12 × Boc). MS MALDI-TOF calcd. for C<sub>107</sub>H<sub>188</sub>N<sub>14</sub>O<sub>48</sub>S (M+H<sub>2</sub>O<sup>+</sup>), 2486.24, obsd: 2485.70.

### DPA71.

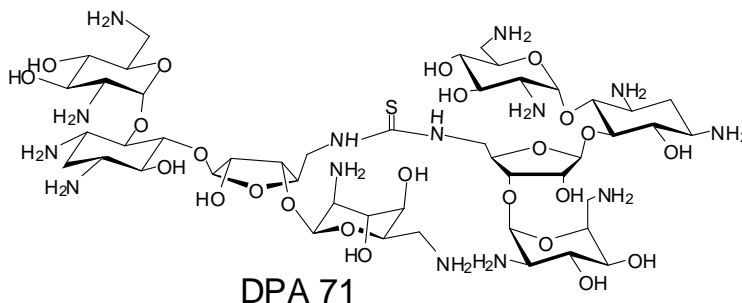

IR (KBr, cm<sup>-1</sup>) 3401 (br, OH), 2093, 1642; <sup>1</sup>H NMR (500 MHz, D<sub>2</sub>O): 5.80 (m, 2 H, H<sub>1II</sub>), 5.28 (d, *J* = 3.16 Hz, 2 H, H<sub>1III</sub>), 5.06 (br, 2 H, H<sub>1IV</sub>), 4.41 (m, 2 H, H<sub>4III</sub>), 4.26 (d, *J* = 5.83 Hz, 2 H, H<sub>2III</sub>), 4.15-4.20 (m, 2 H, H<sub>4IV</sub>), 4.05-4.11 (m, 2 H, H<sub>4I</sub>), 3.96-4.03 (m, 4 H), 3.85 (t, *J* = 9.78 Hz, 2 H, H<sub>6II</sub>), 3.78 (t, *J* = 10.25 Hz, 2 H, H<sub>5I</sub>), 3.64-3.74 (m, 8 H, H<sub>2IV</sub>, H<sub>4II</sub>, H<sub>5IV</sub>, and H<sub>3III</sub>), 3.60 (s, 2 H, H<sub>6I</sub>), 3.40-3.53 (m, 6 H, H<sub>3II</sub>, H<sub>3I</sub> and H<sub>5II</sub>), 3.27-3.38 (m, 4 H), 3.17-3.27 (m, 8 H, H<sub>3I</sub>, H<sub>5II</sub>, H<sub>3II</sub>), 3.08-3.17 (m, 4 H), 2.23-2.31 (m, 2 H, H<sub>2</sub>leq.), 1.69 (q, *J* = 12.45 Hz, 2 H, H<sub>2</sub>lax.); MS MALDI-TOF m/z for C<sub>47</sub>H<sub>92</sub>N<sub>14</sub>O<sub>24</sub>S [M+H<sub>2</sub>O]<sup>+</sup>, calcd 1287.38, found 1287.67.

## DPA72.

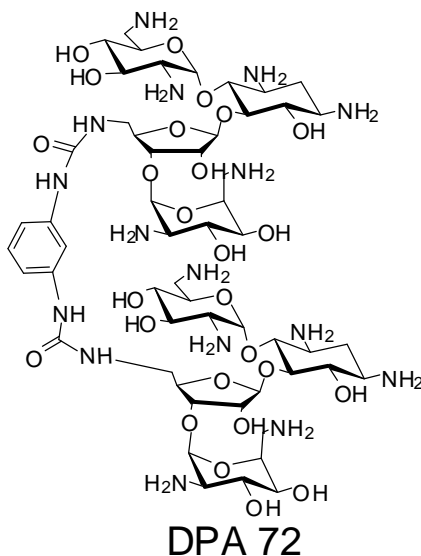

IR (KBr,  $\text{cm}^{-1}$ ) 3434 (br, OH), 2093, 1638, 1366;  $^1\text{H}$  NMR (500 MHz,  $\text{D}_2\text{O}$ )  $\delta$  7.32 (m, 1 H, Ar), 7.24 (m, 1 H, Ar), 7.05 (m, 2 H, Ar), 5.85-5.91 (m, 2H,  $\text{H}_{\text{II}}$ ), 5.28-5.32 (m, 2H,  $\text{H}_{\text{III}}$ ), 5.14-5.20 (m, 2H,  $\text{H}_{\text{IV}}$ ), 4.35-4.43 (m, 2 H), 4.25-4.34 (m, 2 H), 4.14-4.24 (m, 6 H), 4.12 (t,  $J = 2.84$  Hz, 4 H), 4.05 (t,  $J = 9.46$  Hz, 2 H,  $\text{H}_{6\text{II}}$ ), 3.85-3.94 (m, 4 H), 3.82 (t,  $J = 8.86$  Hz, 2 H,  $\text{H}_{5\text{I}}$ ), 3.71-3.78 (m, 4 H), 3.53-3.70 (m, 8 H), 3.47-3.51 (m, 4 H), 3.39-3.47 (m, 4 H), 3.30-3.38 (m, 8 H), 3.18-3.30 (m, 8 H), 3.00-3.17 (m, 8 H), 2.32-2.41 (m, 2 H,  $\text{H}_{2\text{Ieq}}$ ), 1.80-1.91 (m, 2 H,  $\text{H}_{2\text{Iax}}$ ); MS MALDI-TOF  $m/z$  for  $\text{C}_{54}\text{H}_{98}\text{N}_{16}\text{O}_{26}$   $[\text{M}+\text{Na}]^+$ , calcd 1410.45, found 1410.33; UV (water)  $\lambda_{\text{max}} = 234$  nm.

## DPA73 (Linker = 1,3-diisothiocyanatopropane).

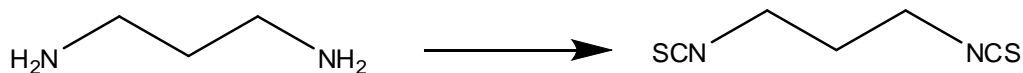

$[\text{R}_f = 0.45$  in  $\text{CH}_2\text{Cl}_2$ ]; IR (KBr,  $\text{cm}^{-1}$ ); 3400, 2967, 2912, 2050 (br, NCS), 1728, 1602, 1472;  $^1\text{H}$  NMR (300 MHz,  $\text{CDCl}_3$ ):  $\delta$  3.75 (t,  $J = 4.25$  Hz, 4 H), 2.07 (p,  $J = 3.21$  Hz, 2 H),  $^{13}\text{C}$  NMR (125 MHz,  $\text{CDCl}_3$ ):  $\delta$  42.09, 30.17.

## DPA73

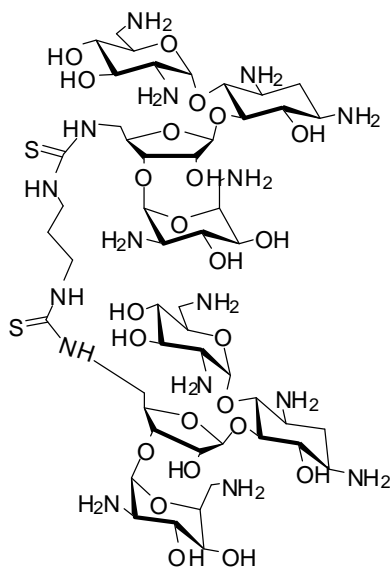

**DPA 73**

IR (KBr,  $\text{cm}^{-1}$ ) 3431 (br, OH), 2091 (weak), 1654, 1524, 1366;  $^1\text{H}$  NMR (500 MHz,  $\text{D}_2\text{O}$ ): 5.98-6.04 (m, 2 H, H<sub>1II</sub>), 5.30-5.34 (m, 2 H, H<sub>1III</sub>), 5.18-5.23 (br, 2 H, H<sub>1IV</sub>), 4.33-4.42 (m, 4 H, H<sub>4III</sub>, H<sub>2III</sub>), 4.26-4.32 (m, 2 H), 4.19-4.25 (m, 2 H, H<sub>4IV</sub>), 4.13 (m, 2 H, H<sub>4I</sub>), 4.10 (t,  $J = 10.09$  Hz, 2 H, H<sub>6II</sub>), 3.95 (t,  $J = 10.56$  Hz, 2 H, H<sub>5I</sub>), 3.74-3.90 (m, 8 H), 3.60-3.75 (m, 8 H, H<sub>2IV</sub>, H<sub>4II</sub>, H<sub>5IV</sub>, and H<sub>3III</sub>), 3.51-3.60 (m, 6 H), 3.42-3.52 (m, 8 H), 3.32-3.41 (m, 6 H), 3.20-3.32 (m, 8 H, H<sub>3I</sub>, H<sub>5II</sub>, H<sub>3II</sub>), 3.00-3.20 (m, 6 H), 2.67-2.87 (m, 4 H, linker protons), 2.37 (dt,  $J_1 = 3.62$  Hz,  $J_2 = 4.25$  Hz, 2 H, H<sub>2leq.</sub>), 1.89 (q,  $J = 13.25$  Hz, 2 H, H<sub>2lax.</sub>), 1.16 (m, 2 H, linker protons); MS MALDI-TOF  $m/z$  for  $\text{C}_{51}\text{H}_{100}\text{N}_{16}\text{O}_{24}\text{S}_2$   $[\text{M}+\text{H}_2\text{O}]^+$ , calcd 1403.44, found 1402.91.

## **N-Boc DPA74.**

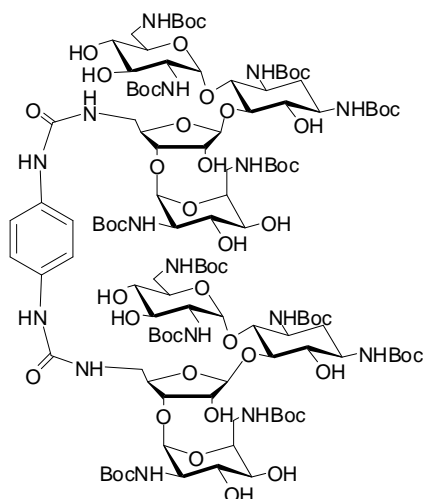

**N-Boc DPA74**

[ $R_f$  0.37 in 10% EtOH in DCM (v/v)]; IR (KBr,  $\text{cm}^{-1}$ ) 3375 (OH), 2930, 2870, 1691, 1600-1500 [-C=C- (aromatic region)];  $^1\text{H-NMR}$  (500 MHz,  $\text{CD}_3\text{COCD}_3$ )  $\delta$  7.42 (s, 4 H, aromatic region), 6.86 (m, 4 H,  $\text{NH}_{6\text{IV}}$ ), 6.57-6.77 (m, 4 H,  $\text{NH}_{1\text{I}}$ ), 6.09-6.33 (m, 4 H,  $\text{NH}_{6\text{II}}$ ,  $\text{NH}_{3\text{I}}$ ), 5.85-6.09 (m, 4 H,  $\text{NH}_{2\text{IV}}$ , and  $\text{NH}_{2\text{II}}$ ), 5.02-5.16 (m, 8 H,  $\text{H}_{1\text{II}}$ ,  $\text{H}_{1\text{III}}$ ,  $\text{OH}_{4\text{IV}}$ ,  $\text{H}_{1\text{IV}}$ ), 4.92-4.98 (m, 4 H), 4.09-4.38 (m, 10 H), 3.95-4.07 (m, 8 H), 3.77-3.91 (m, 8 H), 3.67-3.77 (m, 4 H), 3.52-3.65 (m, 16 H), 3.40-3.52 (m, 10 H), 3.25-3.39 (m, 4 H), 3.07-3.23 (m, 6 H), 2.11-2.16 (m, 2 H), 1.52-1.70 (m, 2 H,  $\text{H}_{2\text{Iax}}$ ), 1.10-1.53 (m, 110 H,  $\text{H}_{2\text{Iax}}$ ,  $12 \times \text{Boc}$ ); MALDI-TOF : calcd for  $\text{C}_{114}\text{H}_{194}\text{N}_{16}\text{O}_{50}$  [ $\text{M}+\text{H}_2\text{O}$ ] $^+$  2605.31, found 2604.10.

**DPA74.**

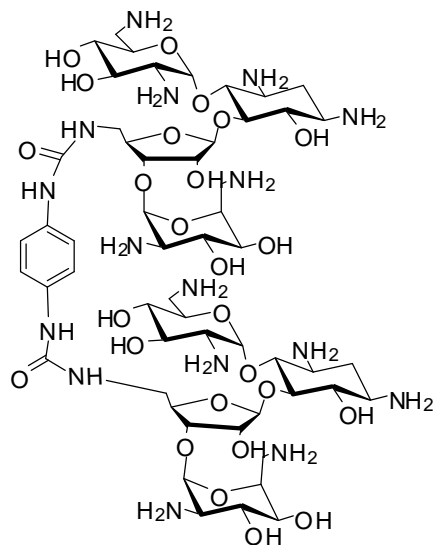

**DPA 74**

IR (KBr,  $\text{cm}^{-1}$ ) 3434 (br, OH), 2089, 1642;  $^1\text{H}$  NMR (500 MHz,  $\text{D}_2\text{O}$ )  $\delta$  7.27 (s, 2H, Ar), 5.91-5.94 (m, 2H,  $\text{H}_{1\text{III}}$ ), 5.34 (d,  $J = 3.47$  Hz, 2H,  $\text{H}_{1\text{III}}$ ), 5.20 (d,  $J = 3.47$  Hz, 2H,  $\text{H}_{1\text{IV}}$ ), 4.42 (t, 2H,  $J = 4.73$  Hz, 2 H  $\text{H}_{4\text{III}}$ ), 4.33-4.35 (m, 2H,  $\text{H}_{2\text{III}}$ ), 4.24 (d,  $J = 5.83$  Hz, 2H,  $\text{H}_{5\text{IV}}$  or  $\text{H}_{3\text{IV}}$ ), 4.17-4.22 (m, 4H,  $\text{H}_{5\text{IV}}$  or  $\text{H}_{3\text{IV}}$ ,  $\text{H}_{3\text{III}}$ ), 4.14 (t,  $J = 2.99$  Hz, 2 H), 3.85-3.95 (m, 8H), 3.65-3.70 (m, 8 H), 3.48-3.55 (m, 4 H), 3.22-3.38 (m, 12 H), 3.12-3.20 (m, 4 H), 3.03 (t,  $J = 9.30$  Hz, 2 H), 2.35-2.43 (m, 2 H,  $\text{H}_{2\text{leq}}$ ), 1.89-2.00 (m, 2 H,  $\text{H}_{2\text{Iax}}$ ); MS MALDI-TOF  $m/z$  for  $\text{C}_{54}\text{H}_{98}\text{N}_{16}\text{O}_{26}$   $[\text{M}+\text{Na}]^+$ , calcd 1410.44, found 1410.79; Anal. Calcd for  $\text{C}_{54}\text{H}_{110}\text{N}_{16}\text{O}_{26}\text{Cl}_{12}$ : C, 35.54; H, 6.08; Cl, 23.31; N, 12.28; O, 22.79. Found: C, 35.18; H, 5.92; N, 11.98; UV (water)  $\lambda_{\text{max}} = 253$  nm.

**DPA75 (Linker = 1,6-diisothiocyanatohexane).**

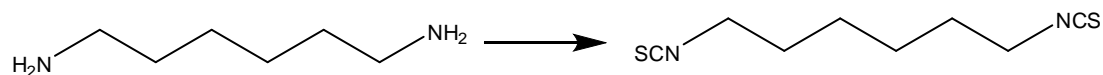

$R_f = 0.60$ , (silica gel,  $\text{CH}_2\text{Cl}_2$ ); IR (KBr,  $\text{cm}^{-1}$ ); 3000-3400 (br), 2105 (NCS), 1670 (br), 1420;  $^1\text{H}$  NMR (300 MHz,  $\text{CDCl}_3$ ):  $\delta$  3.31-3.38 (m, 4 H), 1.59-1.62 (m, 4 H), 1.44 (t,  $J = 3.62$  Hz, 4H).  $^{13}\text{C}$  NMR (125 MHz,  $\text{CDCl}_3$ ,  $25^\circ\text{C}$ ):  $\delta$  122 (NCS), 42.82, 31.05, 25.93.

## N-Boc DPA75.

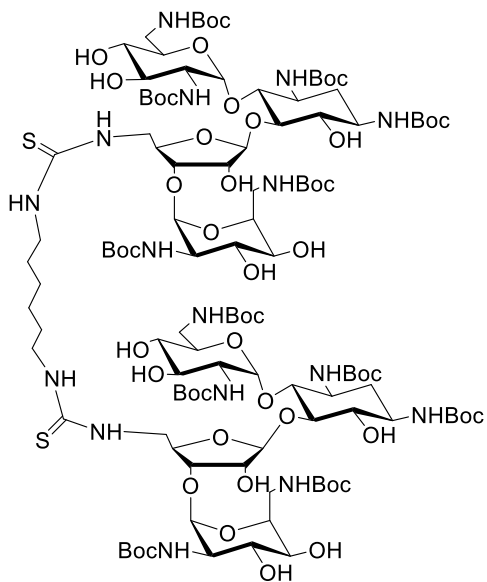

**N-Boc DPA75**

[ $R_f$  = 0.36, 10% CH<sub>3</sub>OH in CH<sub>2</sub>Cl<sub>2</sub>, (v/v)]; <sup>1</sup>H-NMR (500 MHz, CD<sub>3</sub>COCD<sub>3</sub>)  $\delta$  6.55-5.92 (m, 12 H, NH<sub>6IV</sub>, NH<sub>1I</sub>, NH<sub>6II</sub>, NH<sub>3I</sub>, NH<sub>2IV</sub>, and NH<sub>2II</sub>), 5.11-5.31 (s, br, 4H, H<sub>1II</sub>, H<sub>1III</sub>), 4.96-5.09 (m, 4 H, OH<sub>4IV</sub>, H<sub>1IV</sub>), 4.85 (s, 2H, OH), 4.72 (s, 2H, OH), 4.40-4.65 (m, 4 H, OH), 4.20-4.31 (m, 4 H, H<sub>5IV</sub> or H<sub>3IV</sub>), 4.13-4.30 (m, 4 H, H<sub>3III</sub> and H<sub>5IV</sub> or H<sub>3IV</sub>), 4.02-4.12 (m, 4 H), 3.91-3.98 (t, 2H,  $J$  = 7.25 Hz, H<sub>2IV</sub>), 3.81-3.90 (m, 8 H), 3.62 (m, 16 H, -O-CH<sub>2</sub>-CH<sub>2</sub>-O-, linker protons), 3.42-3.54 (m, 6 H), 3.17-3.38 (m, 10 H), 1.32-1.63 (m, 110 H, H<sub>2Iax</sub>, 12  $\times$  Boc); MALDI-TOF : calcd for C<sub>114</sub>H<sub>202</sub>N<sub>16</sub>O<sub>48</sub>S<sub>2</sub> [M]<sup>+</sup> 2627.32, found 2627.14.

## DPA75.

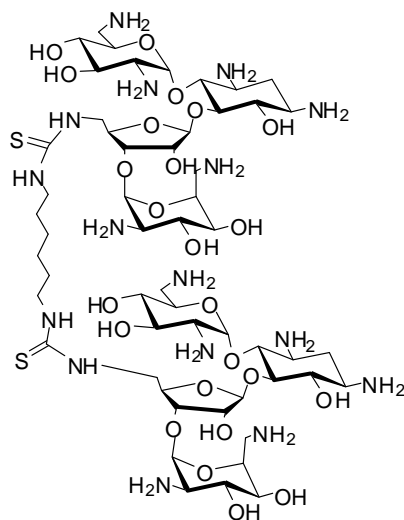

**DPA 75**

IR (KBr,  $\text{cm}^{-1}$ ) 3432 (br, OH), 2089, 1644;  $^1\text{H}$  NMR (500 MHz,  $\text{D}_2\text{O}$ )  $\delta$  5.91-5.95 (m, 2H,  $\text{H}_{1\text{II}}$ ), 5.32 (d,  $J = 3.94$  Hz, 2H,  $\text{H}_{1\text{III}}$ ), 5.17 (m, 2H,  $\text{H}_{1\text{IV}}$ ), 4.30 (t,  $J = 4.73$  Hz, 2 H,  $\text{H}_{4\text{III}}$ ), 4.23 (t,  $J = 4.73$  Hz, 2 H), 4.19 (t,  $J = 4.89$  Hz, 2 H), 4.13-4.17 (m, 2 H), 4.11 (t,  $J = 2.99$  Hz, 2 H), 4.05 (t,  $J = 9.93$  Hz, 2 H,  $\text{H}_{6\text{II}}$ ), 4.92 (t,  $J = 9.14$  Hz, 2 H,  $\text{H}_{5\text{I}}$ ), 3.80-3.88 (m, 4 H), 3.69-3.74 (m, 2 H), 3.63 (t,  $J = 9.93$  Hz, 2 H,  $\text{H}_{3\text{II}}$ ), 3.40-3.50 (m, 4 H), 3.28-3.40 (m, 8 H), 3.21-3.28 (m, 6 H), 3.12-3.17 (m, 2 H), 2.91-3.02 (m, 2 H), 2.34-2.42 (m, 2 H,  $\text{H}_{2\text{Ieq.}}$ ), 1.77 (q,  $J = 11.51$ , 2 H,  $\text{H}_{2\text{Iax.}}$ ); MS MALDI-TOF  $m/z$  for  $\text{C}_{54}\text{H}_{106}\text{N}_{16}\text{O}_{24}\text{S}_2$   $[\text{M}]^+$ , calcd 1427.64, found 1427.57.

**N-Boc DPA76.**

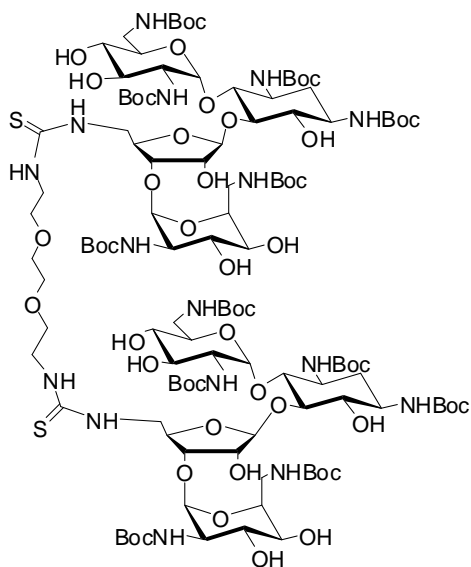

**N-Boc DPA76**

[ $R_f$  = 0.38, 10%  $\text{CH}_3\text{OH}$  in  $\text{CH}_2\text{Cl}_2$ , (v/v)]; IR ( $\text{cm}^{-1}$ ): 3375 (OH), 2930, 2870, 2150 ( $\text{C}=\text{S}$ ), 1691, 1510;  $^1\text{H-NMR}$  (500 MHz,  $\text{CD}_3\text{COCD}_3$ )  $\delta$  7.42 (s, 2 H, ( $\text{S}=\text{C-NH-CH}_2\text{-CH}_2\text{-O-}$ ), 7.32 (s, 2 H,  $\text{C}_{5\text{III}}\text{-CH}_2\text{-CH}_2\text{-NH-C}=\text{S}$ ), 6.59 (t, 2H,  $J = 5$  Hz,  $\text{NH}_{6\text{IV}}$ ), 6.47 (m, 2H,  $\text{NH}_{1\text{I}}$ ), 6.34-5.90 (m, 8 H,  $\text{NH}_{6\text{II}}$ ,  $\text{NH}_{3\text{I}}$ ,  $\text{NH}_{2\text{IV}}$ , and  $\text{NH}_{2\text{II}}$ ), 5.29 (s, 2H,  $\text{H}_{1\text{II}}$ ), 5.13 (s, 2H,  $\text{H}_{1\text{III}}$ ), 4.95-5.05 (m, 4 H,  $\text{OH}_{4\text{IV}}$ ,  $\text{H}_{1\text{IV}}$ ), 4.77 (s, 2H, OH), 4.63 (s, 2H, OH), 4.38-4.49 (m, 4 H, OH), 4.21-4.32 (m, 4 H,  $\text{H}_{5\text{IV}}$  or  $\text{H}_{3\text{IV}}$ ), 4.10-4.21 (m, 4 H,  $\text{H}_{3\text{III}}$  and  $\text{H}_{5\text{IV}}$  or  $\text{H}_{3\text{IV}}$ ), 4.05 (s, 2H,  $\text{H}_{4\text{IV}}$ ), 3.94 (t, 2H,  $J = 7.25$  Hz,  $\text{H}_{2\text{IV}}$ ), 3.80-3.92 (m, 8 H), 3.70-3.81 (m, 8 H), 3.66 (m, 12 H,  $\text{-O-CH}_2\text{-CH}_2\text{-O-}$ , linker protons), 3.39-3.58 (m, 12 H), 3.17-3.37 (m, 10 H), 1.35-1.60 (m, 110 H,  $\text{H}_{2\text{Iax}}$ ,  $12 \times \text{Boc}$ ); MALDI-TOF : calcd for  $\text{C}_{118}\text{H}_{210}\text{N}_{16}\text{O}_{50}\text{S}_2$  [ $\text{M}+\text{Na}$ ] $^+$  2650.33, found 2650.44.

**DPA76.**



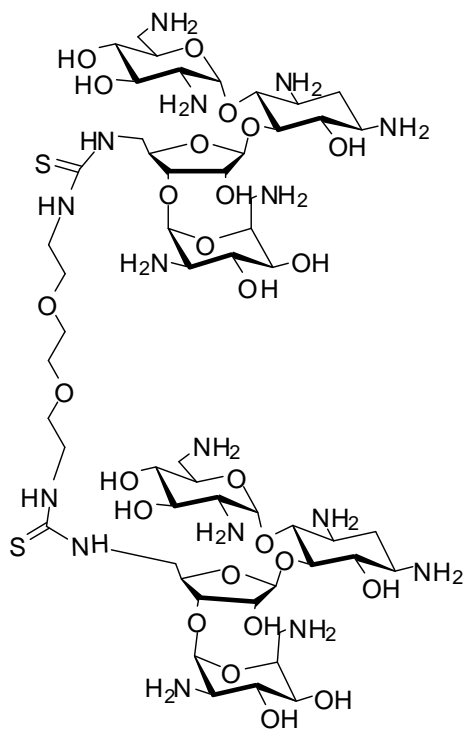

**DPA 76**

IR (KBr,  $\text{cm}^{-1}$ ) 3433 (br, OH), 2926, 1648, 1524;  $^1\text{H}$  NMR (500 MHz,  $\text{D}_2\text{O}$ )  $\delta$  5.96 (m, 2H,  $\text{H}_{1\text{II}}$ ), 5.32 (s, 2H,  $\text{H}_{1\text{III}}$ ), 5.18 (s, 2H,  $\text{H}_{1\text{IV}}$ ), 4.38 (m, 2H,  $\text{H}_{4\text{III}}$ ), 4.23-4.35 (m, 4H,  $\text{H}_{2\text{III}}$ ), 4.07-4.16 (m, 2H,  $\text{H}_{5\text{IV}}$  or  $\text{H}_{3\text{IV}}$ ), 4.02 (t,  $J = 9.78$  Hz, 2 H,  $\text{H}_{6\text{II}}$ ), 3.92 (t,  $J = 9.93$  Hz, 2 H), 3.78-3.87 (m, 8 H), 3.72 (m, 4 H), 3.54-3.68 (m, 12 H), 3.39-3.53 (m, 10 H), 3.14-3.38 (m, 16 H), 2.30-2.43 (m, 2 H,  $\text{H}_{2\text{Ieq}}$ ), 1.74-1.88 (m, 2 H,  $\text{H}_{2\text{Iax}}$ ); MS MALDI-TOF  $m/z$  for  $\text{C}_{54}\text{H}_{106}\text{N}_{16}\text{O}_{26}\text{S}_2$   $[\text{M}+\text{H}_2\text{O}]^+$ , calcd 1482.64, found 1481.89; Anal. Calcd for  $\text{C}_{54}\text{H}_{118}\text{N}_{16}\text{O}_{26}\text{Cl}_{12}$   $\text{S}_2$ : C, 34.19; H, 6.27; Cl, 22.42; N, 11.81; O, 21.93; S, 3.38. Found: C, 33.95; H, 6.16; N, 11.68.

**N-Boc DPA77.**

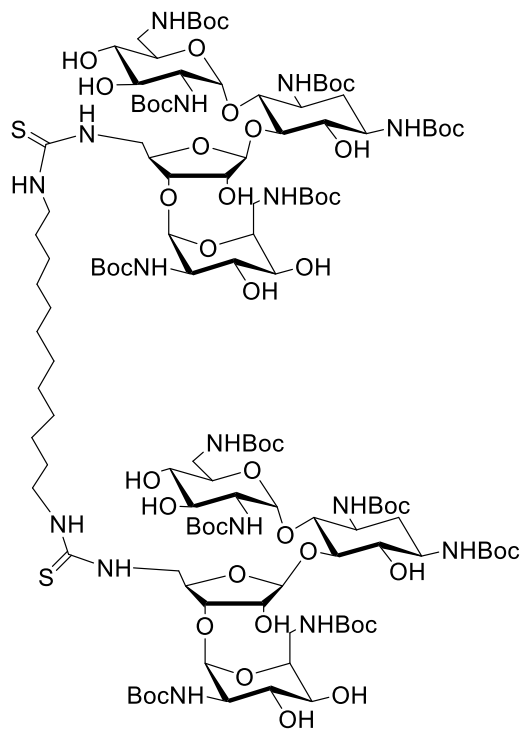

[ $R_f$  = 0.40, 10%  $\text{CH}_3\text{OH}$  in  $\text{CH}_2\text{Cl}_2$ , (v/v)];  $^1\text{H-NMR}$  (500 MHz,  $\text{CD}_3\text{COCD}_3$ )  $\delta$  6.54-6.63 (t, 2H,  $J$  = 5 Hz,  $\text{NH}_{6\text{IV}}$ ), 6.40-6.53 (m, 2H,  $\text{NH}_{1\text{I}}$ ), 6.35-5.87 (m, 10 H,  $\text{NH}_{6\text{II}}$ ,  $\text{NH}_{3\text{I}}$ ,  $\text{NH}_{2\text{IV}}$ , and  $\text{NH}_{2\text{II}}$ ), 5.28 (s, 2H,  $\text{H}_{1\text{II}}$ ), 5.15 (s, 2H,  $\text{H}_{1\text{III}}$ ), 4.94-5.08 (m, 4 H,  $\text{OH}_{4\text{IV}}$ ,  $\text{H}_{1\text{IV}}$ ), 4.75 (s, 2H, OH), 4.62 (s, 2H, OH), 4.40-4.51 (m, 4 H, OH), 4.20-4.31 (m, 4 H,  $\text{H}_{5\text{IV}}$  or  $\text{H}_{3\text{IV}}$ ), 4.11-4.20 (m, 4 H,  $\text{H}_{3\text{III}}$  and  $\text{H}_{5\text{IV}}$  or  $\text{H}_{3\text{IV}}$ ), 4.01-4.11 (s, 4H), 3.91-3.98 (t, 2H,  $J$  = 7.25 Hz,  $\text{H}_{2\text{IV}}$ ), 3.81-3.90 (m, 8 H), 3.71-3.81 (m, 8 H), 3.66 (m, 8 H, -O- $\text{CH}_2$ - $\text{CH}_2$ -O-, linker protons), 3.39-3.58 (m, 10 H), 3.20-3.38 (m, 10 H), 1.32-1.63 (m, 110 H,  $\text{H}_{2\text{Iax}}$ , 12  $\times$  Boc); MALDI-TOF : calcd for  $\text{C}_{120}\text{H}_{214}\text{N}_{16}\text{O}_{48}\text{S}_2$   $[\text{M}]^+$  2711.40, found 2710.96.

**DPA77.**

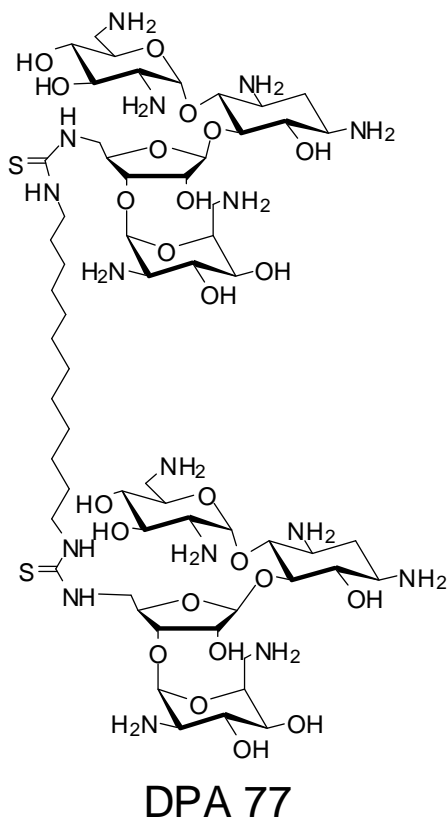

IR (KBr,  $\text{cm}^{-1}$ ) 3412 (br, OH), 2928, 1684, 1521, 1366;  $^1\text{H}$  NMR (500 MHz,  $\text{D}_2\text{O}$ ): 5.94 (d,  $J = 4.09$  Hz, 2 H,  $\text{H}_{\text{III}}$ ), 5.30 (d,  $J = 2.68$  Hz, 2 H,  $\text{H}_{\text{III}}$ ), 5.19 (d,  $J = 1.58$  Hz, 2 H,  $\text{H}_{\text{IV}}$ ), 4.29-4.34 (m, 4 H), 4.16-4.23 (m, 4 H), 4.11 (t,  $J = 2.99$  Hz, 2 H), 4.02-4.08 (m, 2 H), 3.98 (t,  $J = 10.25$  Hz, 2 H,  $\text{H}_{6\text{II}}$ ), 3.76-3.84 (m, 4 H), 3.90 (t,  $J = 9.14$  Hz, 2 H,  $\text{H}_{5\text{I}}$ ), 3.76-3.84 (m, 4 H), 3.69-3.73 (m, 2 H), 3.59 (t,  $J = 9.15$  Hz, 2 H), 3.44-3.51 (m, 4 H), 3.42 (d,  $J = 3.94$  Hz, 2 H), 3.40 (d,  $J = 4.10$  Hz, 2 H), 3.30-3.80 (m, 6 H), 3.20-3.30 (m, 8 H), 3.09-3.18 (m, 6 H), 3.01 (dd,  $J_1 = 3.47$  Hz,  $J_2 = 3.62$  Hz, 2 H), 2.76-2.84 (m, 4 H, linker protons), 2.70 (q,  $J = 8.98$  Hz, 2 H), 2.37 (dt,  $J_1 = 3.94$  Hz,  $J_2 = 4.25$  Hz, 2 H,  $\text{H}_{2\text{Ieq}}$ ), 1.80 (q,  $J = 12.61$  Hz, 2 H,  $\text{H}_{2\text{Iax}}$ ), 1.19 (s, 2 H, linker protons), 1.05-1.12 (m, 18 H, linker protons); MS MALDI-TOF  $m/z$  for  $\text{C}_{60}\text{H}_{118}\text{N}_{16}\text{O}_{24}\text{S}_2$   $[\text{M}+\text{Na}]^+$ , calcd 1534.98, found 1535.81.

**N-Boc DPA78 (Linker = 4, 9-dioxa-1, 12- dodecadiisothiocyanate).**

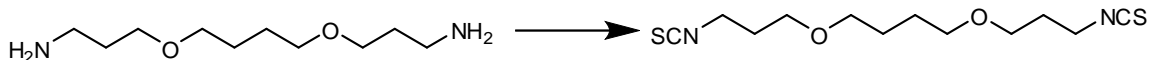

$R_f = 0.50$ , (silica gel,  $\text{CH}_2\text{Cl}_2$ ); IR (KBr,  $\text{cm}^{-1}$ ) 3350, 2950, 2110 (NCS), 1250, 1050;  $^1\text{H}$  NMR (300 MHz,  $\text{CDCl}_3$ ):  $\delta$  3.65 (t,  $J = 4.22$  Hz, 4H), 3.55 (t,  $J = 3.84$  Hz, 4H), 3.46 (t,  $J = 3.72$  Hz, 4H), 1.93 (p,  $J = 3.64$  Hz, 4H), 1.61 (p,  $J = 3.58$  Hz, 4H).  $^{13}\text{C}$  NMR (125 MHz,  $\text{CDCl}_3$ ):  $\delta$  131, 70.88, 66.58, 53.5, 42.15, 30.21, 26.36; MS/GC calcd.: 288.07, obsd ( $\text{M}^+$ ): 288.

**N-Boc DPA78.**

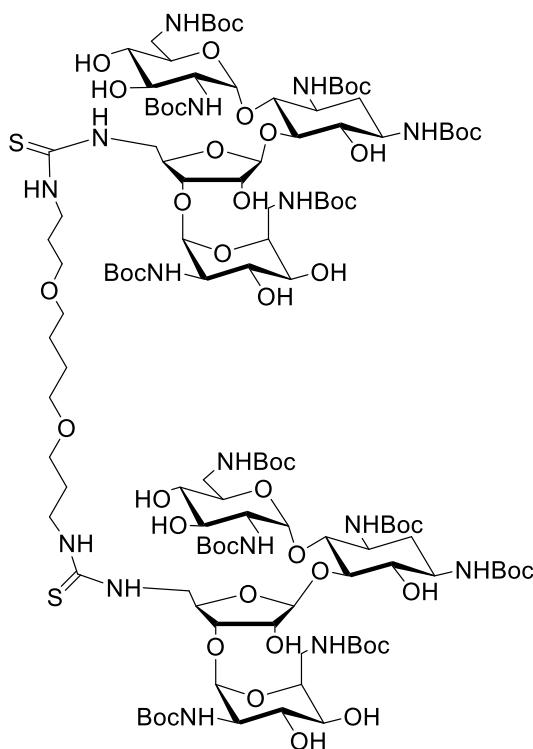

[ $R_f$  0.40, 10 % MeOH in  $\text{CH}_2\text{Cl}_2$ , (v/v)];  $^1\text{H}$  NMR (300 MHz,  $\text{CDCl}_3$ , 25 °C);  $\delta$  6.15 (s, 2H), 5.46 (br s, 2 H), 5.13 (br s, 2 H), 4.92 (m, 2 H), 4.23 (m, 2 H), 4.09 (br s, 4 H), 3.88-3.91 (m, 4 H), 3.74-3.77 (m, 4 H), 3.63-3.67 (m, 4 H), 3.53-3.56 (m, 4 H), 3.44-3.47 (m,

4 H), 3.56-3.44 (m, 30 H), 3.00-3.30 (m, 24 H), 1.92-1.95 (m, 2 H), 1.87-1.91 (m, 4 H), 1.60-1.64 (m, 8 H), 1.38-1.58 (m, 110 H);  $^{13}\text{C}$  NMR (500 MHz,  $\text{D}_2\text{O}$ )  $\delta$  167 (C=S), 155-158 (m,  $6 \times \text{Boc}$ , C=O), 100, 71, 69, 67, 62, 53, 52, 51, 42.5, 38.5, 33, 32, 31.8, 31.1, 31, 27.5, 26, 25; MALDI-TOF : calcd for  $\text{C}_{118}\text{H}_{210}\text{N}_{16}\text{O}_{50}\text{S}_2$   $[\text{M}]^+$  2716.39, found 2716.90.

**DPA78.**

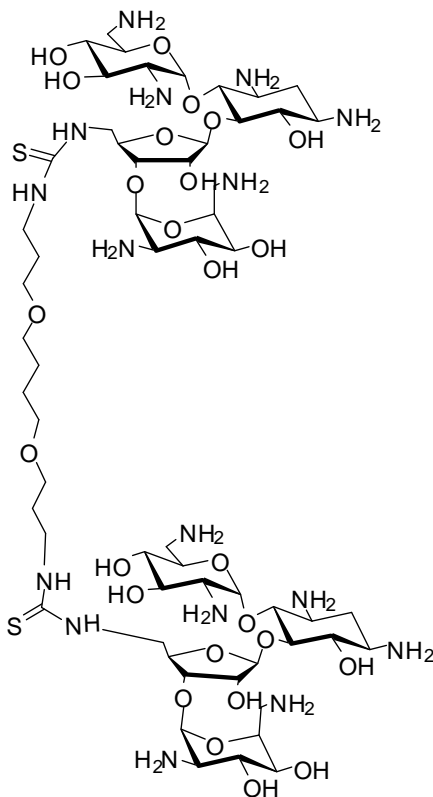

**DPA 78**

$^1\text{H}$  NMR (500 MHz,  $\text{D}_2\text{O}$ ): 5.99 (d,  $J = 3.92$  Hz, 2 H,  $\text{H}_{\text{III}}$ ), 5.28-5.36 (m, 2 H,  $\text{H}_{\text{III}}$ ), 5.16-5.22 (m, 2 H,  $\text{H}_{\text{IV}}$ ), 4.36-4.44 (m, 2 H), 4.22-4.32 (m, 4 H), 4.17-4.23 (m, 4 H), 4.08-4.15 (m, 2 H), 4.03 (t,  $J = 9.78$  Hz, 2 H,  $\text{H}_{6\text{II}}$ ), 3.90 (t,  $J = 9.93$  Hz, 2 H,  $\text{H}_{5\text{I}}$ ), 3.78-3.87 (m, 4 H), 3.67-3.77 (m, 4 H), 3.54-3.65 (m, 12 H, linker protons), 3.40-3.54 (m, 10 H), 3.32-3.39 (m, 6 H), 3.30 (t,  $J = 4.58$  Hz, 2 H), 3.12-3.29 (m, 8 H), 2.38 (dt,  $J_1 = 3.78$  Hz,  $J_2 = 4.41$  Hz, 2 H,  $\text{H}_{2\text{Ieq.}}$ ), 1.71-1.91 (m, 4 H,  $\text{H}_{2\text{Iax.}}$ , linker protons), 1.05-1.25 (m, 4

H, linker protons), 1.05-1.12 (m, 18 H, linker protons);  $^{13}\text{C}$  NMR (500 MHz,  $\text{D}_2\text{O}$ )  $\delta$  176, 109, 97, 91, 77, 75, 74, 73, 72, 70.9, 70.6, 70.1, 69.5, 68.1, 68, 62.5, 61, 53, 52, 51, 50, 49, 48, 42.5, 40.5, 40.1, 27.5, 25; MALDI-TOF : calcd for  $\text{C}_{58}\text{H}_{114}\text{N}_{16}\text{O}_{26}\text{S}_2$   $[\text{M}+\text{H}_2\text{O}]^+$  1533.75, found 1533.43.

**DPA79** (Synthesis and characterization of DPA79 is reported in S. Kumar, L. Xue and D. P. Arya, *J. Am. Chem. Soc.*, 2011, **133**, 7361-7375).

### **N-Boc DPA80.**

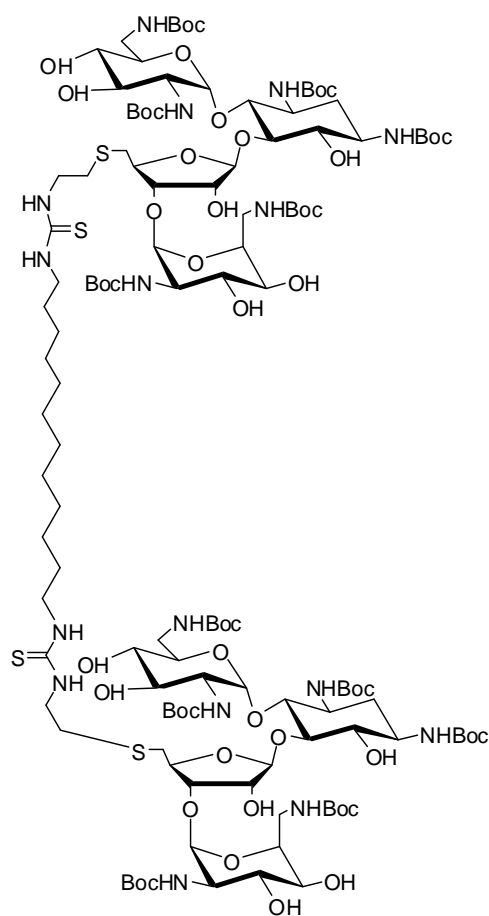

**N-Boc DPA80**

$[\text{R}_f = 0.42, 10\% \text{CH}_3\text{OH in } \text{CH}_2\text{Cl}_2 \text{ (v/v)}]$ ; IR (KBr,  $\text{cm}^{-1}$ ) 3300 (br, OH), 2950, 2902, 2833, 2107 (br,  $-\text{C}=\text{S}$ ), 1727, 1615, 1450;  $^1\text{H}$ -NMR (500 MHz,  $\text{CD}_3\text{COCD}_3$ )  $\delta$  7.58 (s, 2

H, (S=C-NH-CH<sub>2</sub>-CH<sub>2</sub>-O-), 6.60 (m, 2 H, NH<sub>6IV</sub>), 6.19-6.35 (m, 4 H, NH<sub>1I</sub>, NH<sub>6II</sub>), 6.14 (s, br, 2 H, NH<sub>3I</sub>), 6.06 (d, *J* = 9.62 Hz, 2 H, NH<sub>2IV</sub>), 5.91 (s, 2 H, NH<sub>2II</sub>), 5.77 (m, 2 H, OH), 4.96-5.14 (m, 8 H, H<sub>1II</sub>, H<sub>1III</sub>, OH<sub>4IV</sub>, H<sub>1IV</sub>), 4.76 (s, 2 H, OH<sub>6I</sub>), 4.56-4.70 (s, 2 H, OH<sub>4II</sub>), 4.18-4.27 (m, 4 H, H<sub>3III</sub> and H<sub>5IV</sub> or H<sub>3IV</sub>), 4.10-4.17 (m, 2 H, H<sub>3IV</sub> or H<sub>5IV</sub>), 3.98-4.10 (m, 8 H, H<sub>4IV</sub>, H<sub>2IV</sub>), 3.90-3.98 (m, 2 H), 3.78-3.86 (m, 6 H, H<sub>5II</sub> or H<sub>5I</sub>), 3.74 (t, *J* = 8.82 Hz, 2 H, H<sub>5II</sub> or H<sub>5I</sub>), 3.51-3.70 (m, 12 H, H<sub>6I</sub>, H<sub>4I</sub>, H<sub>3I</sub>, H<sub>5III</sub>, and H<sub>2II</sub>), 3.38-3.51 (m, 8 H, H<sub>3II</sub> and H<sub>1I</sub>), 3.22-3.38 (m, 10 H), 3.12-3.22 (m, 4 H, H<sub>3I</sub> or H<sub>1I</sub>), 2.98-3.12 (m, 4 H, H<sub>3I</sub> or H<sub>1I</sub>), 1.10-1.65 (m, 130 H, H<sub>2Iax</sub>, 6 × Boc, linker protons); MS MALDI-TOF calcd. for C<sub>124</sub>H<sub>222</sub>N<sub>16</sub>O<sub>50</sub>S<sub>2</sub> (M+Na<sup>+</sup>), 2817.30, obsd, 2818.45.

**DPA80.**

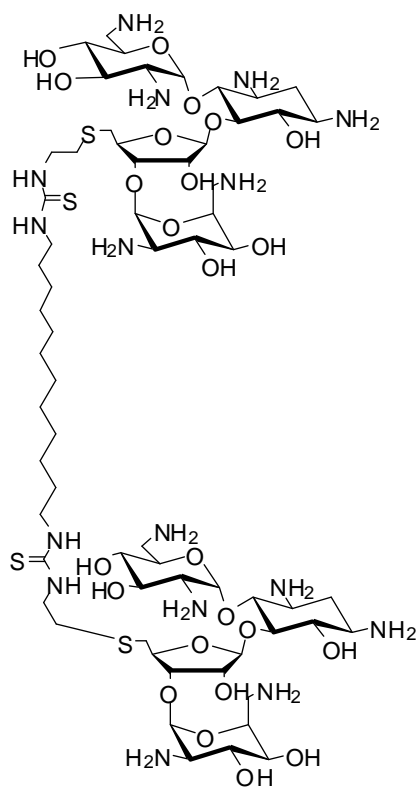

**DPA 80**

IR (KBr,  $\text{cm}^{-1}$ ) 3432 (br, OH), 2102, 1646;  $^1\text{H}$  NMR (500 MHz,  $\text{D}_2\text{O}$ ): 5.96 (t,  $J = 3.94$  Hz, 2 H,  $\text{H}_{\text{II}}$ ), 5.32 (m, 2 H,  $\text{H}_{\text{III}}$ ), 5.18-5.24 (m, 2 H,  $\text{H}_{\text{IV}}$ ), 4.29-4.36 (m, 4 H), 4.17-4.26 (m, 4 H), 4.10-4.15 (m, 2 H), 3.97-4.09 (m, 4 H,  $\text{H}_{6\text{I}}$ ), 3.92 (t,  $J = 9.30$  Hz, 2 H,  $\text{H}_{5\text{I}}$ ), 3.77-3.87 (m, 6 H), 3.68-3.74 (m, 2 H), 3.60 (t,  $J = 9.30$  Hz, 2 H), 3.47-3.52 (m, 2 H), 3.40-3.47 (m, 6 H), 3.31-3.40 (m, 8 H), 3.20-3.32 (m, 8 H), 3.09-3.20 (m, 6 H), 2.98-3.05 (m 2 H), 2.96 (m, 2 H), 2.77-2.89 (m, 4 H), 2.72 (q,  $J = 8.98$  Hz, 2 H), 2.37 (dt,  $J_1 = 3.94$  Hz,  $J_2 = 4.25$  Hz, 2 H,  $\text{H}_{2\text{Ieq}}$ ), 1.81 (q,  $J = 12.45$  Hz, 2 H,  $\text{H}_{2\text{Iax}}$ ), 1.25-1.32 (s, 4 H, linker protons), 1.04-1.13 (m, 18 H, linker protons); MS MALDI-TOF  $m/z$  for  $\text{C}_{64}\text{H}_{126}\text{N}_{16}\text{O}_{24}\text{S}_4$   $[\text{M}+2\text{H}_2\text{O}]^+$ , calcd 1668.04, found 1668.15.

### DPA311.

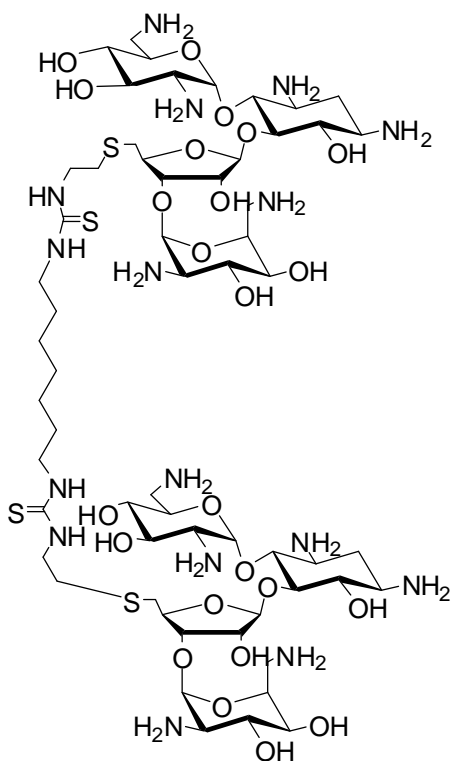

DPA311



IR (KBr,  $\text{cm}^{-1}$ ) 3433 (br, OH), 2110, 1641;  $^1\text{H}$  NMR (500 MHz,  $\text{D}_2\text{O}$ )  $\delta$  5.85-5.60 (m, 2 H,  $\text{H}_{\text{III}}$ ), 5.25-5.38 (m, 2 H,  $\text{H}_{\text{III}}$ ), 5.10-5.20 (m, 2 H,  $\text{H}_{\text{IV}}$ ), 4.15-4.35 (m, 8H), 4.08-4.14 (m, 2 H), 3.97-4.06 (m, 2 H), 3.88-3.96 (m, 2 H,  $\text{H}_{5\text{I}}$ ), 3.75-3.86 (m, 4 H), 3.68-3.74 (m, 2 H), 3.54-3.64 (m, 4 H), 2.95-3.50 (m, 30 H), 2.50-2.85 (m, 6 H), 2.30-2.40 (m, 2 H,  $\text{H}_{2\text{Ieq}}$ ), 1.71-1.90 (m, 2 H,  $\text{H}_{2\text{Iax}}$ ), 1.30-1.58 (m, 4 H, linker protons), 1.02-1.25 (m, 12 H, linker protons); MS MALDI-TOF  $m/z$  for  $\text{C}_{59}\text{H}_{116}\text{N}_{16}\text{O}_{24}\text{S}_4$   $[\text{M}+\text{H}_2\text{O}]^+$ , calcd 1579.91, found 1580.21.

### DPA312.

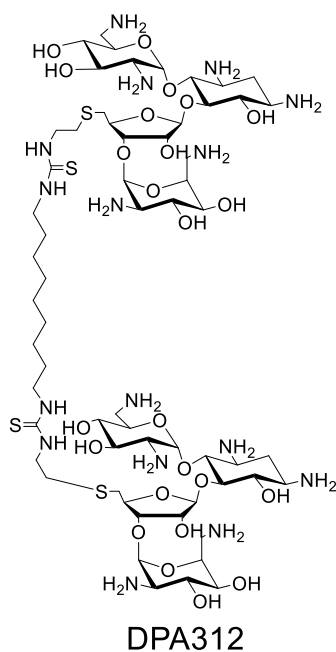

IR (KBr,  $\text{cm}^{-1}$ ) 3430 (br, OH), 2106, 1642;  $^1\text{H}$  NMR (500 MHz,  $\text{D}_2\text{O}$ )  $\delta$  5.85-5.96 (m, 2 H,  $\text{H}_{\text{III}}$ ), 5.20-5.28 (m, 2 H,  $\text{H}_{\text{III}}$ ), 5.10-5.15 (m, 2 H,  $\text{H}_{\text{IV}}$ ), 4.17-4.30 (m, 6 H), 4.12-4.16 (m, 2 H), 4.06 (t,  $J = 2.84$  Hz, 2 H), 3.94 (t,  $J = 9.78$  Hz, 2 H,  $\text{H}_{5\text{I}}$ ), 3.86 (t,  $J = 9.30$  Hz, 2 H), 3.70-3.80 (m, 6 H), 3.64-3.68 (m, 2 H), 3.48-3.59 (m, 6 H), 3.41-3.45 (m, 2 H), 3.31-3.40 (m, 4 H), 3.26-3.30 (m, 6 H), 3.14-3.25 (m, 8 H), 3.04-3.13 (m, 4 H), 2.94-3.04 (m,

2 H), 2.55-2.80 (m, 6 H), 2.27-2.37 (m, 2 H, H<sub>2Ieq.</sub>), 1.75 (q,  $J = 12.45$  Hz, 2 H, H<sub>2Iax.</sub>), 1.30-1.41 (m, 4 H, linker protons), 1.02-1.20 (m, 12 H, linker protons); MS MALDI-TOF  $m/z$  for C<sub>61</sub>H<sub>120</sub>N<sub>16</sub>O<sub>24</sub>S<sub>4</sub> [M+H<sub>2</sub>O]<sup>+</sup>, calcd 1589.96, found 1608.0.

### DPA313.

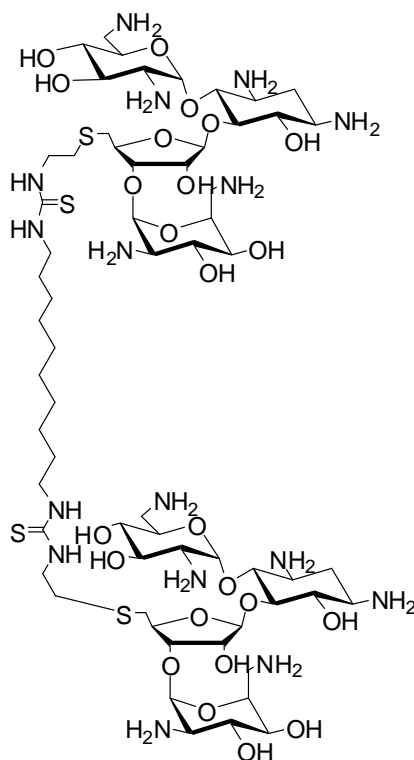

DPA313

IR (KBr, cm<sup>-1</sup>) 3431 (br, OH), 2104, 1646; <sup>1</sup>H NMR (500 MHz, D<sub>2</sub>O)  $\delta$  5.85-5.97 (m, 2 H, H<sub>III</sub>), 5.24-5.33 (m, 2 H, H<sub>IIII</sub>), 5.13-5.21 (m, 2 H, H<sub>IV</sub>), 4.20-4.37 (m, 6 H), 4.13-4.19 (m, 2 H), 4.05-4.12 (m, 2 H), 3.96 (t,  $J = 9.62$  Hz, 2 H, H<sub>5I</sub>), 3.88 (t,  $J = 9.62$  Hz, 2 H), 3.72-3.83 (m, 6 H), 3.66-3.72 (m, 2 H), 3.51-3.64 (m, 6 H), 3.29-3.50 (m, 10 H), 3.16-3.30 (m, 6 H), 2.95-3.15 (m, 6 H), 2.60-2.83 (m, 6 H), 2.30-2.40 (m, 2 H, H<sub>2Ieq.</sub>), 1.75 (q,  $J = 12.13$  Hz, 2 H, H<sub>2Iax.</sub>), 1.30-1.57 (m, 4 H, linker protons), 1.02-1.20 (m, 12 H, linker

protons); MS MALDI-TOF m/z for  $C_{62}H_{122}N_{16}O_{24}S_4$   $[M+H_2O]^+$ , calcd 1603.98, found 1622.18.

*Hexa-N-Boc deoxy-neomycin-5''-isothiocyanate (A).*

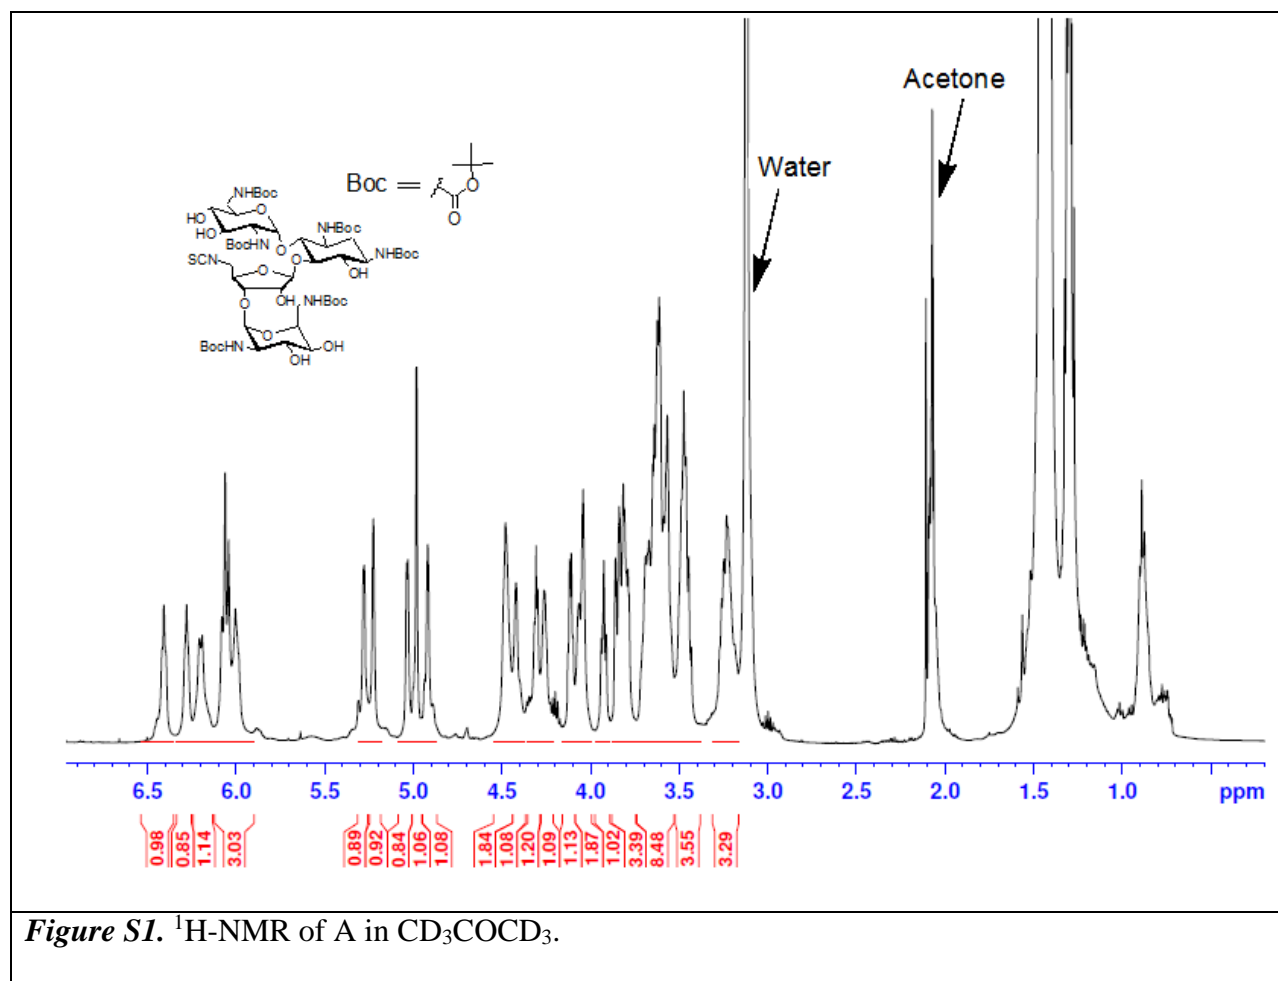

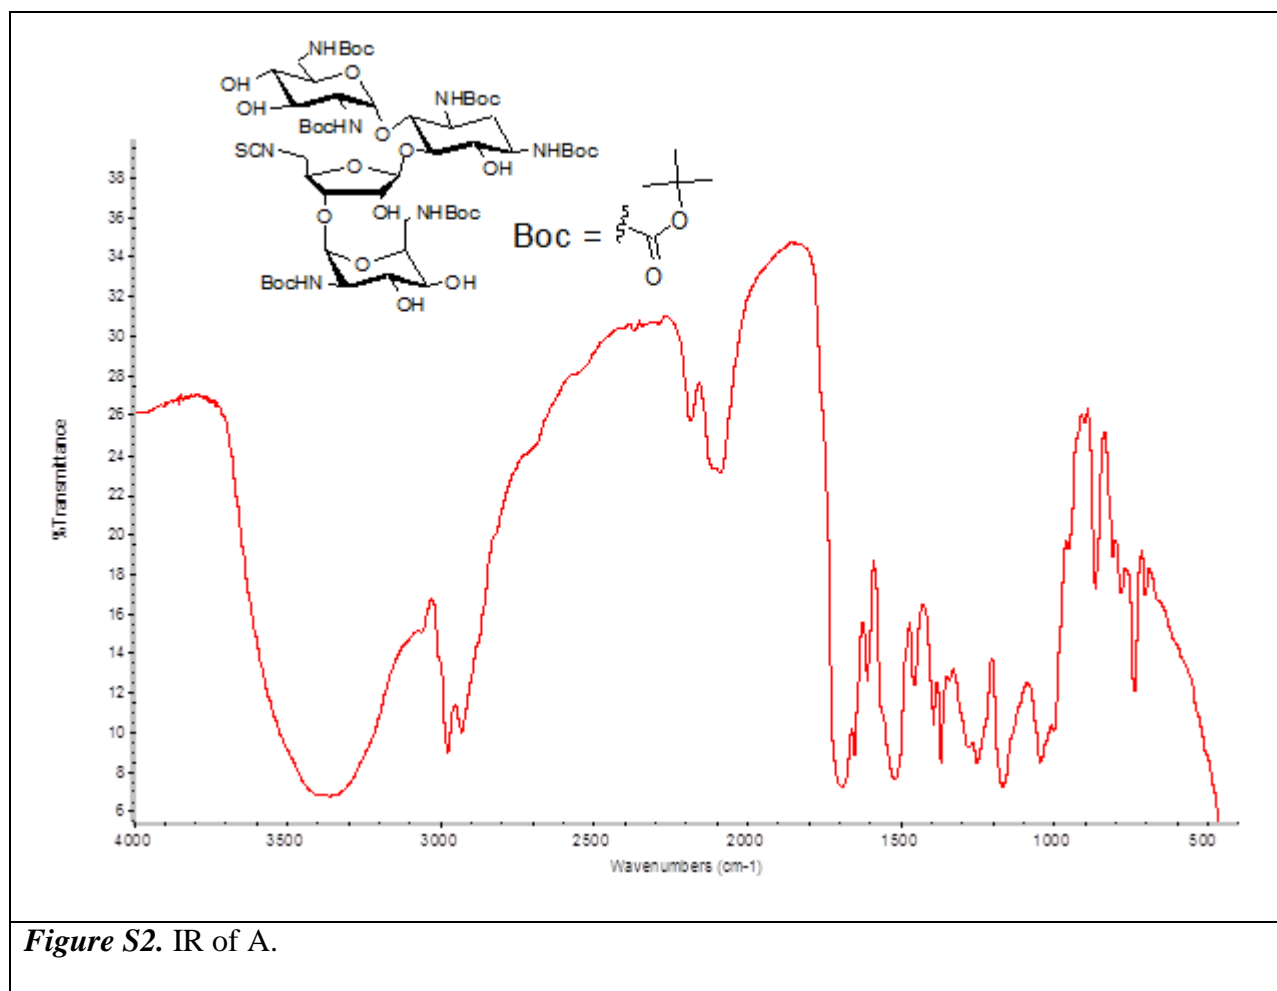

**Figure S2.** IR of A.

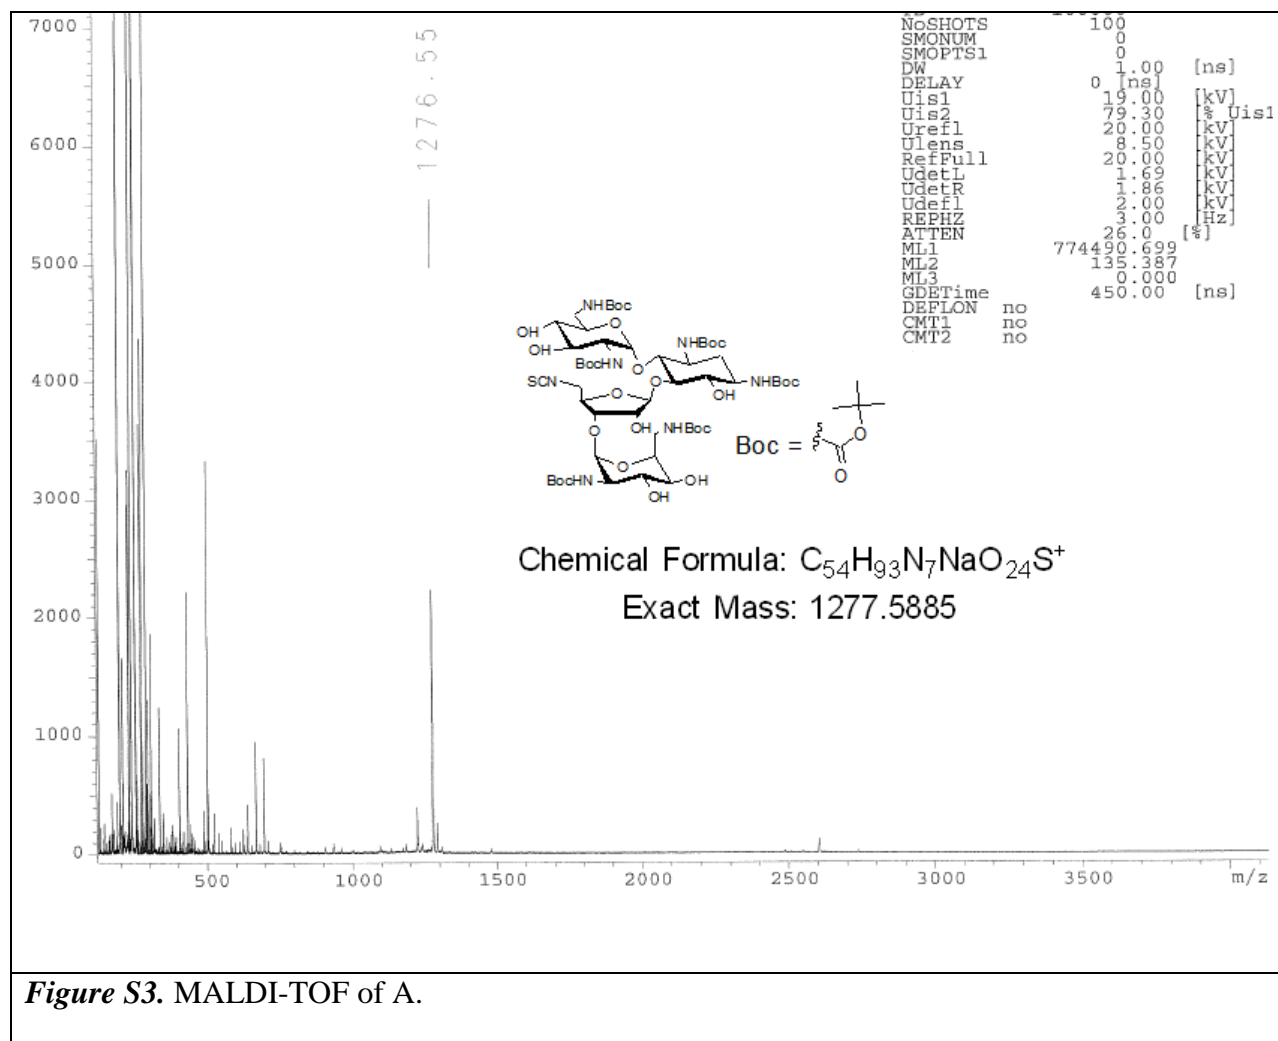

N-Boc DPA 71.

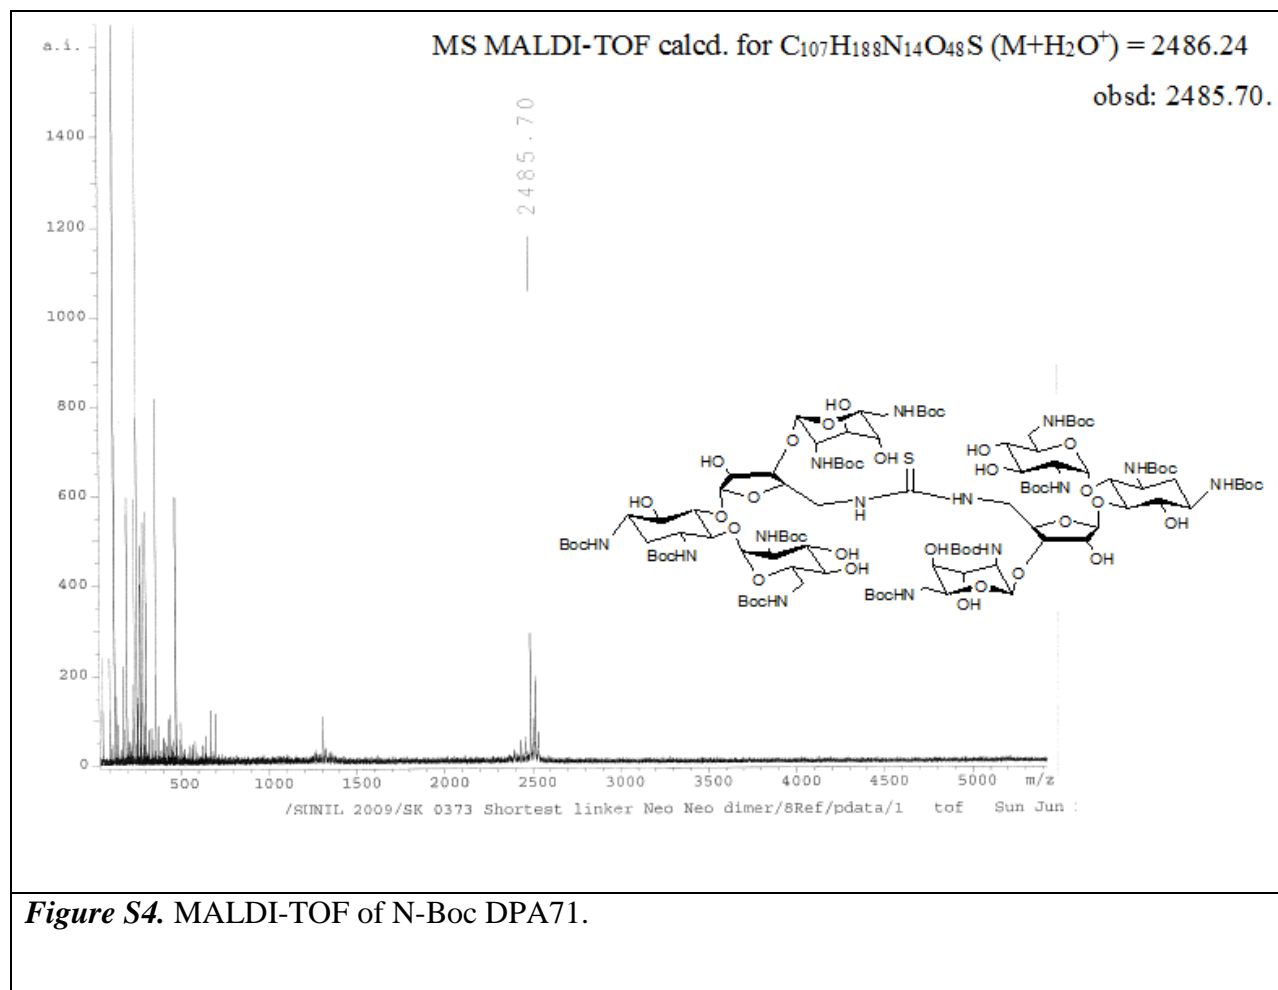

**Figure S4.** MALDI-TOF of N-Boc DPA71.

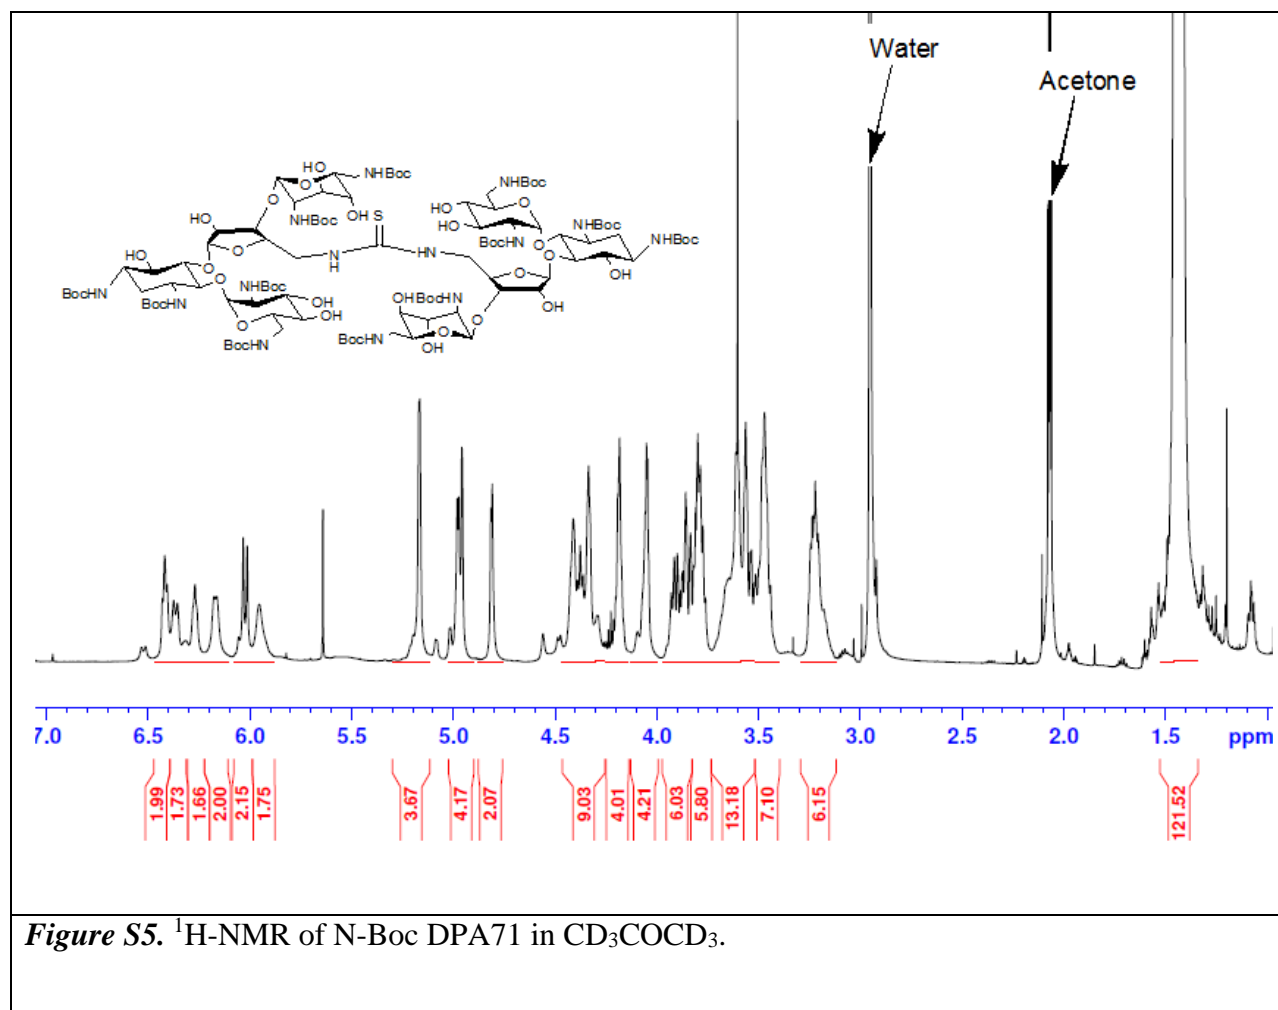

**Figure S5.** <sup>1</sup>H-NMR of N-Boc DPA71 in CD<sub>3</sub>COCD<sub>3</sub>.



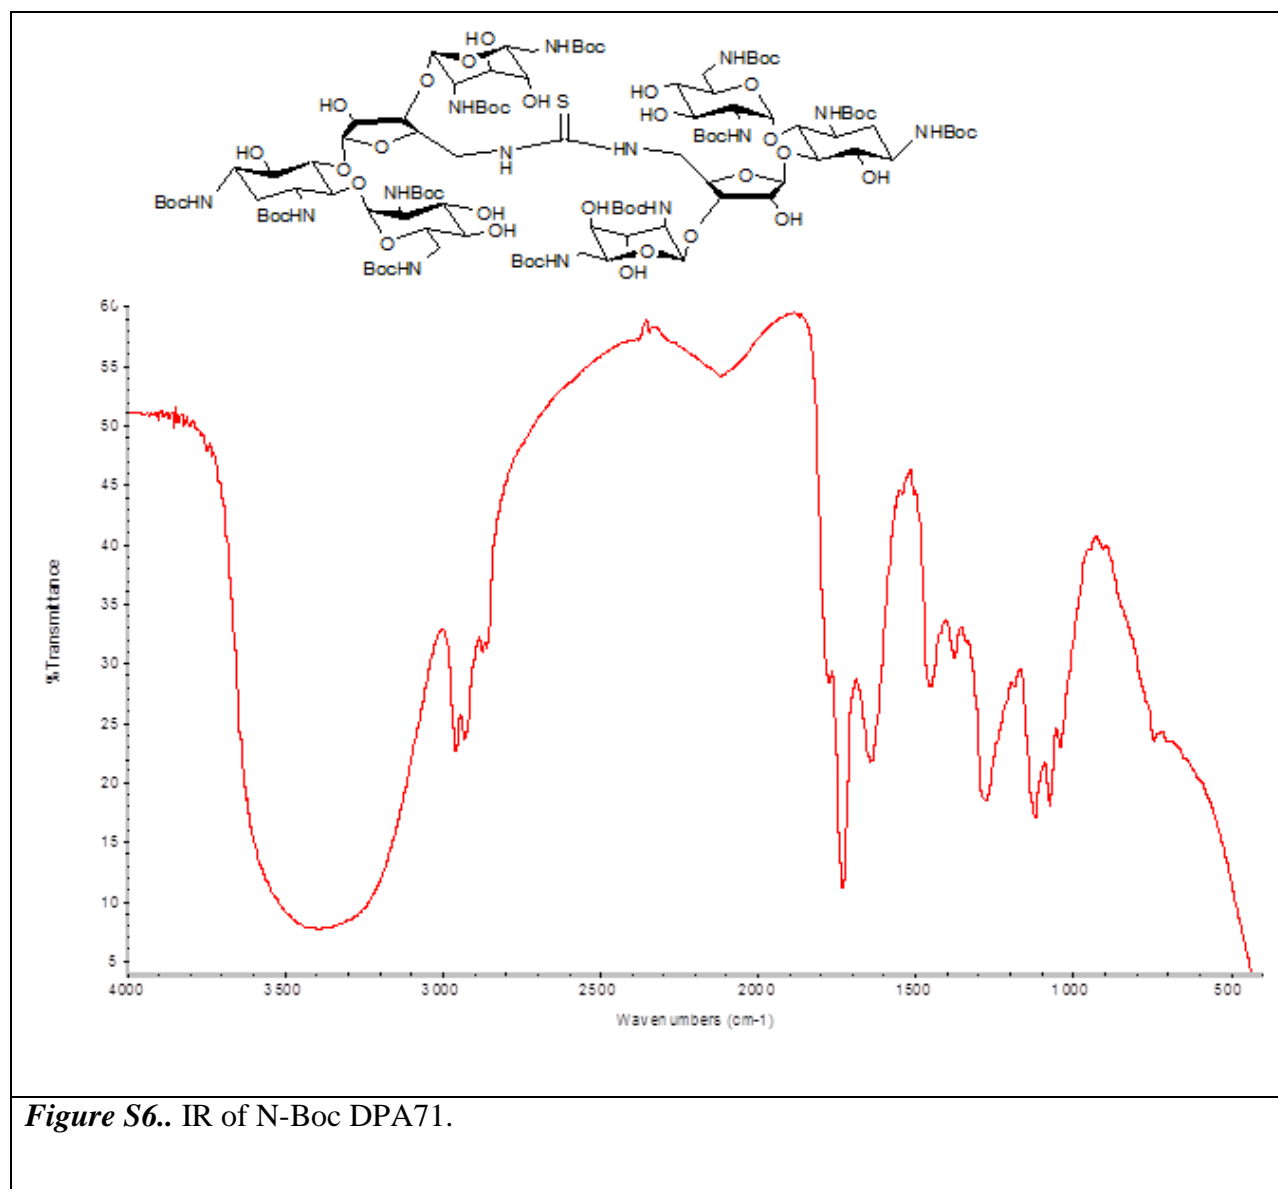

DPA71.

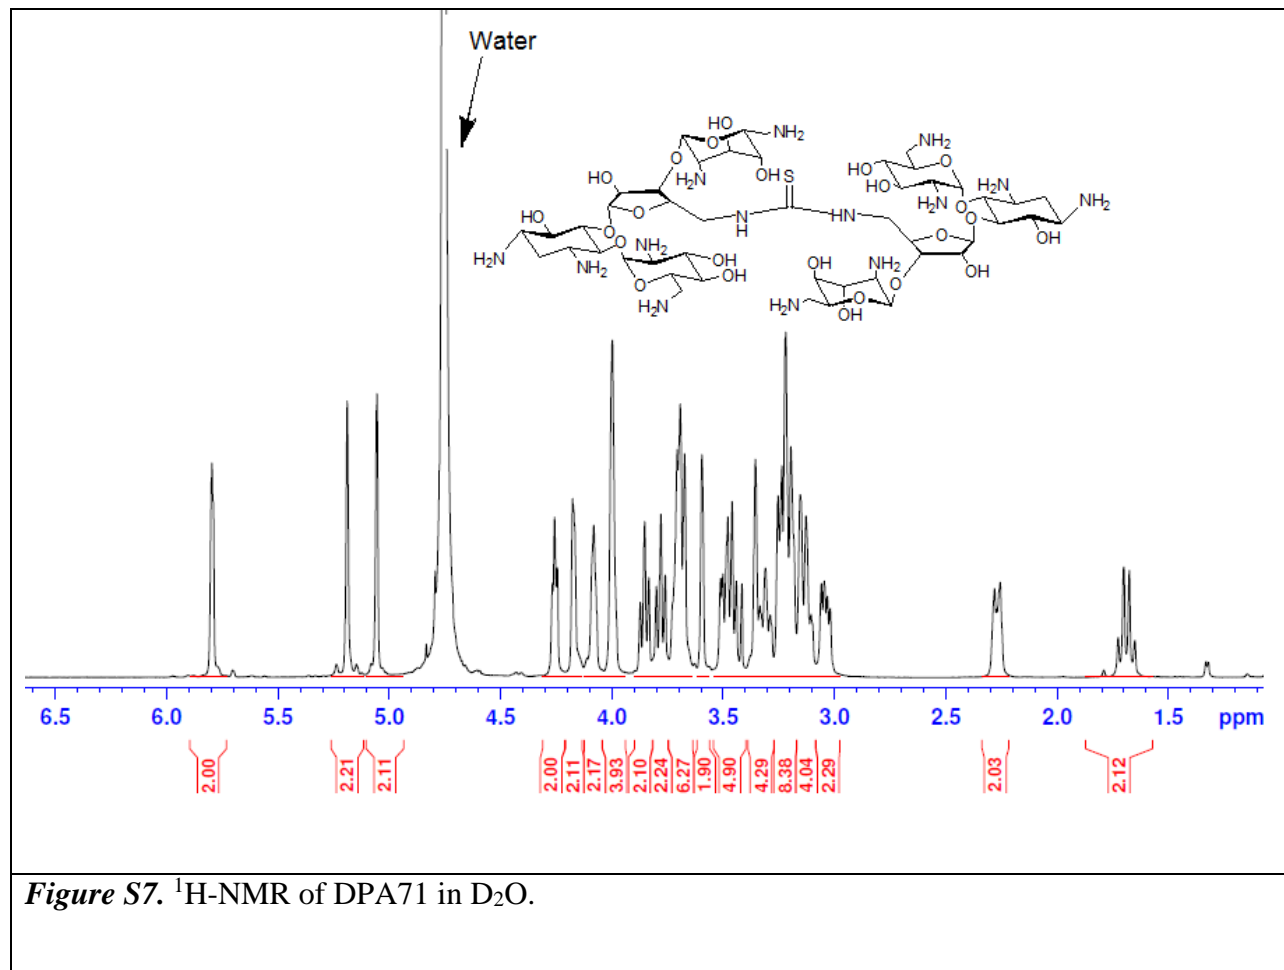

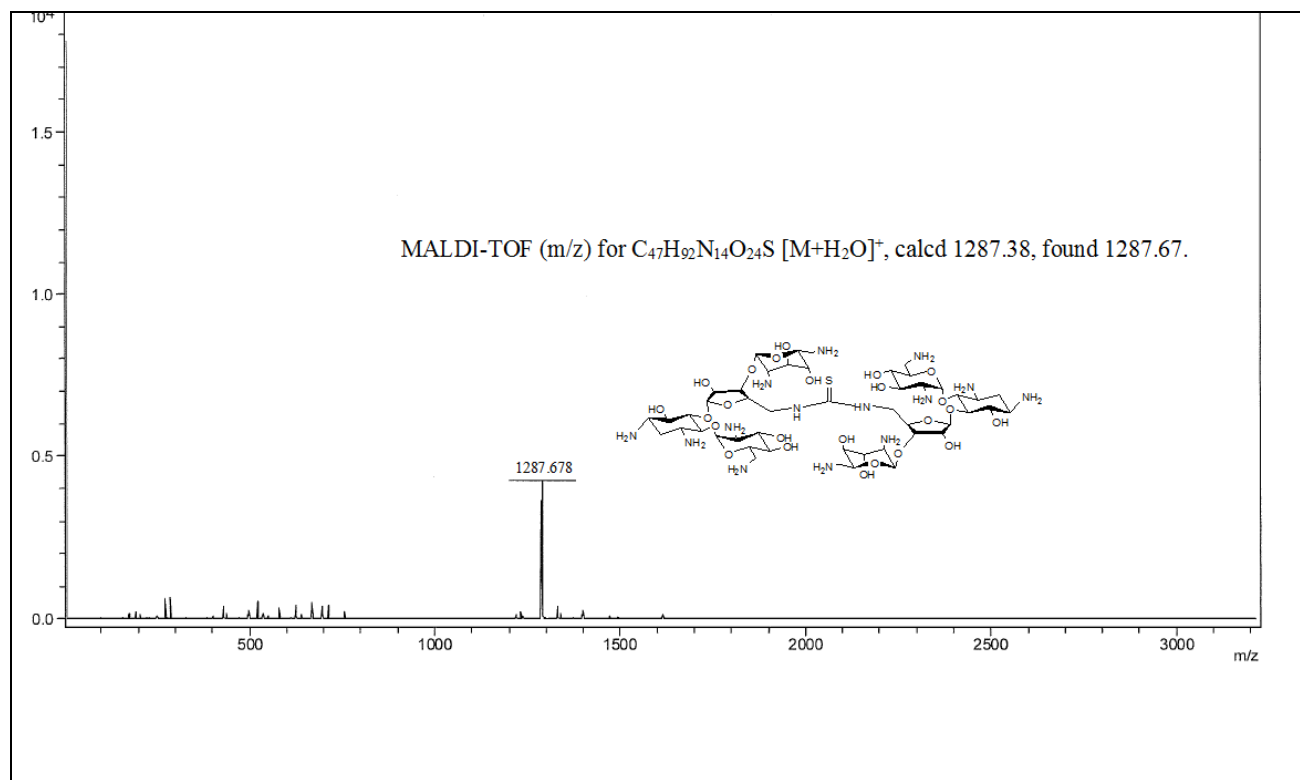

**Figure S8.** MALDI-TOF of DPA71.

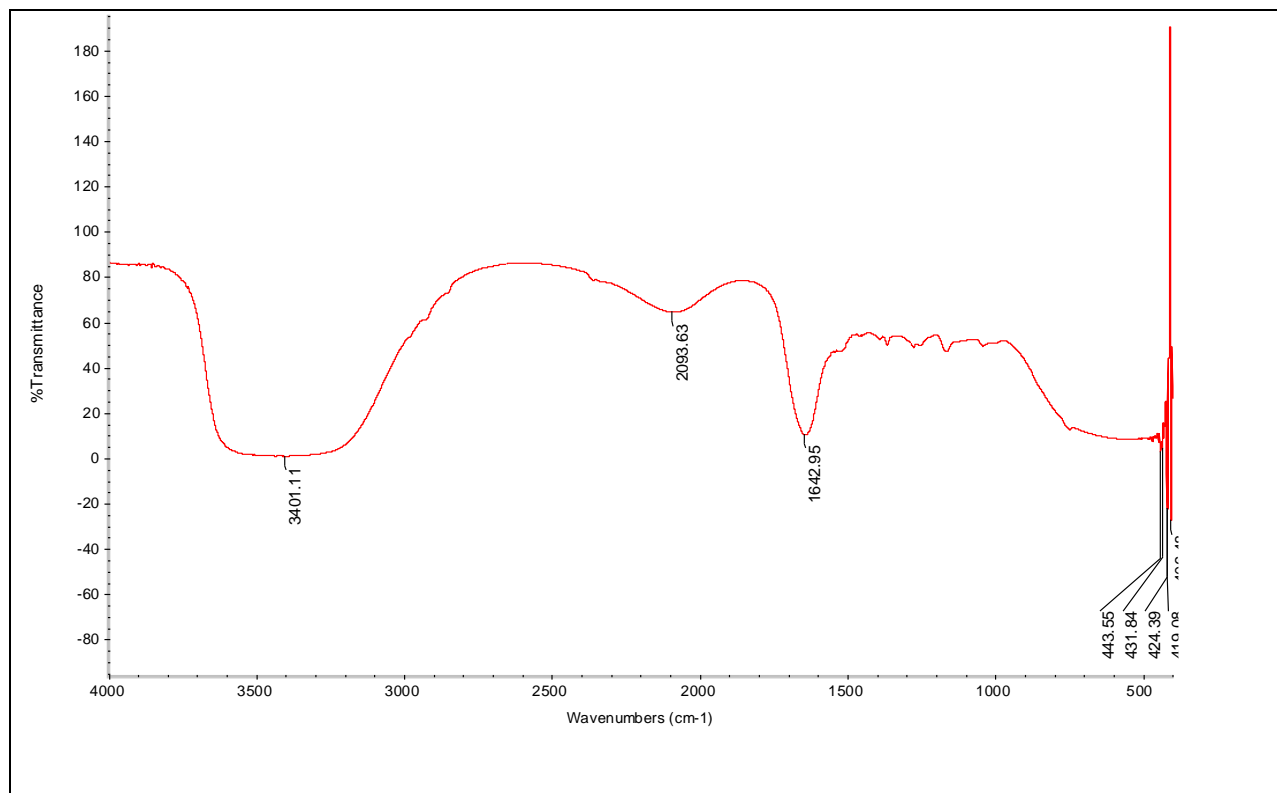

**Figure 9.** IR of DPA71.

DPA 72.

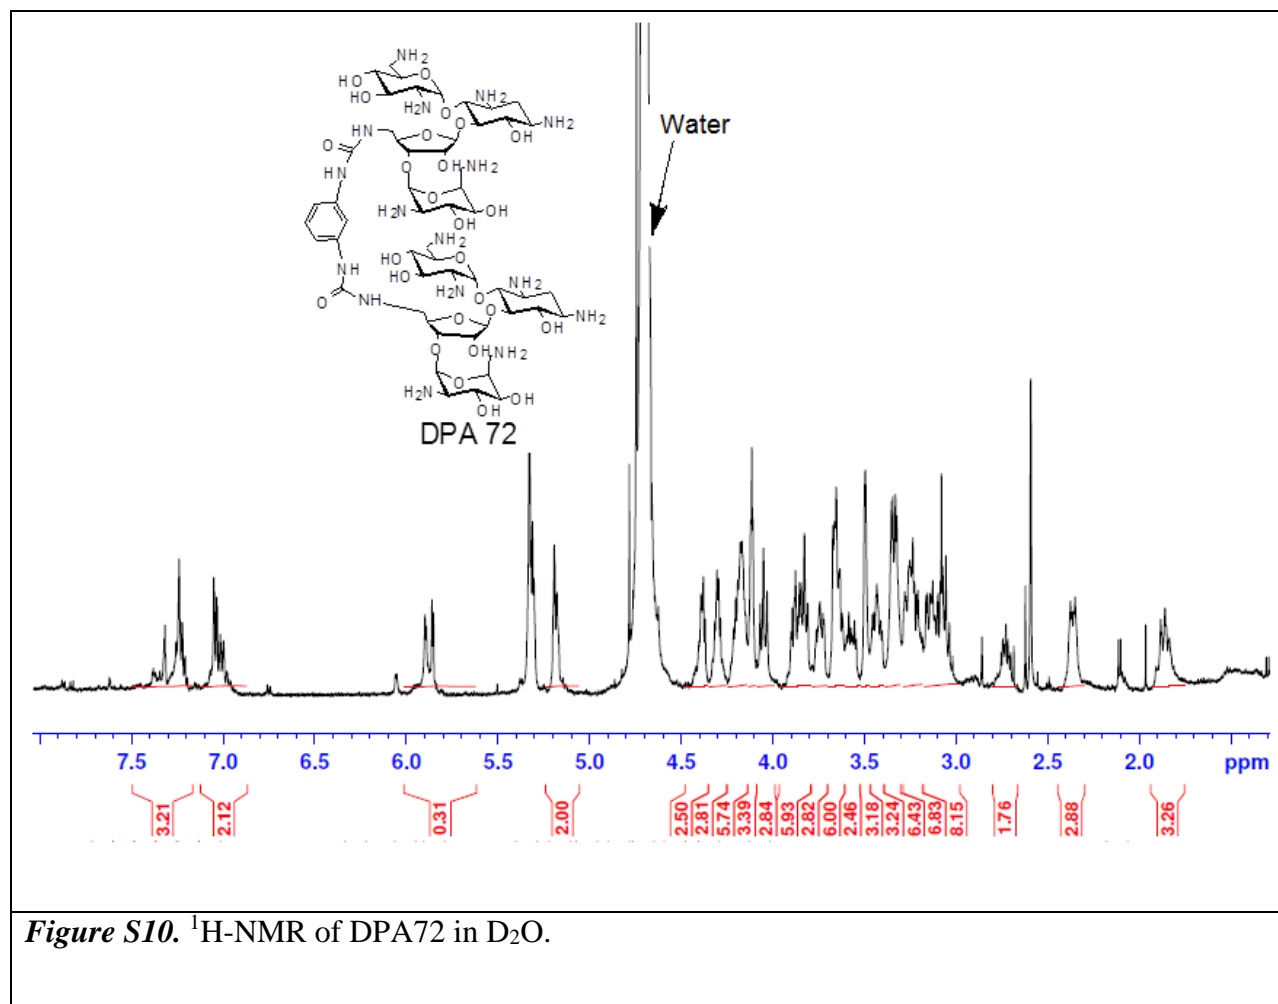

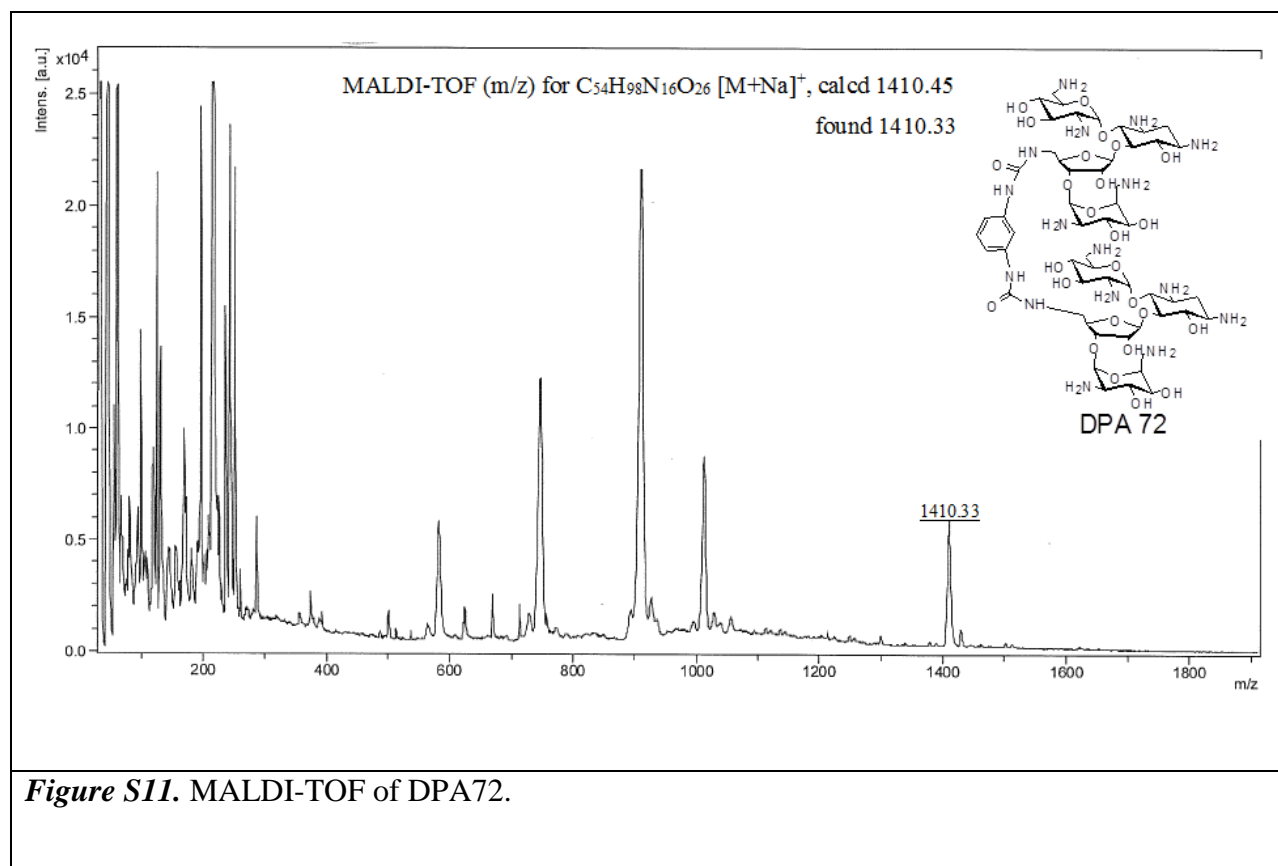

**Figure S11.** MALDI-TOF of DPA72.

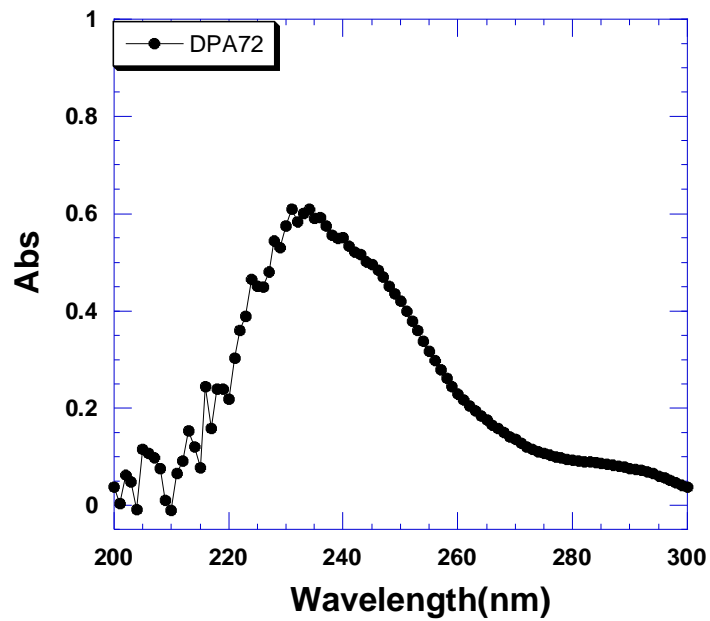

**Figure S12.** UV absorbance scan of DPA72. Scan was taken in water and the concentration of DPA72 was 25  $\mu\text{M}$ .  $T = 25\text{ }^{\circ}\text{C}$ .

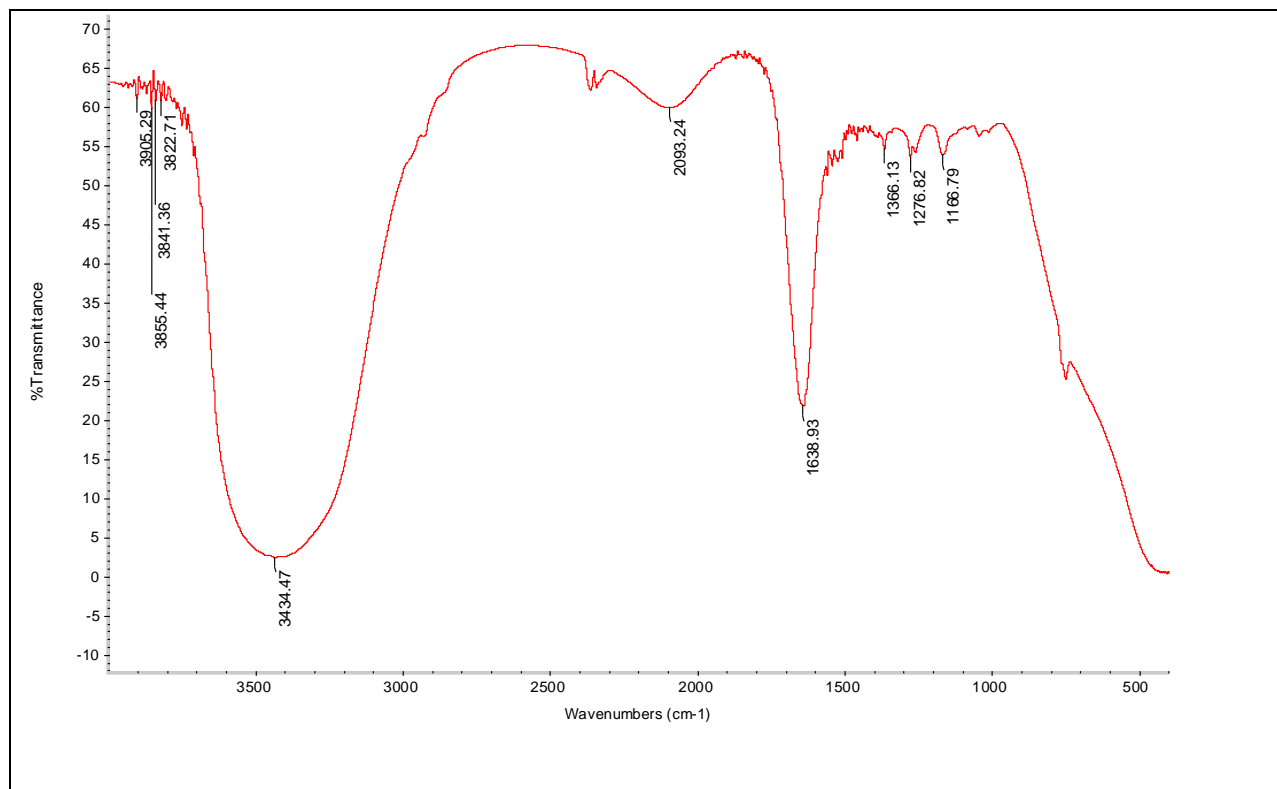

**Figure S13.** IR of DPA72.



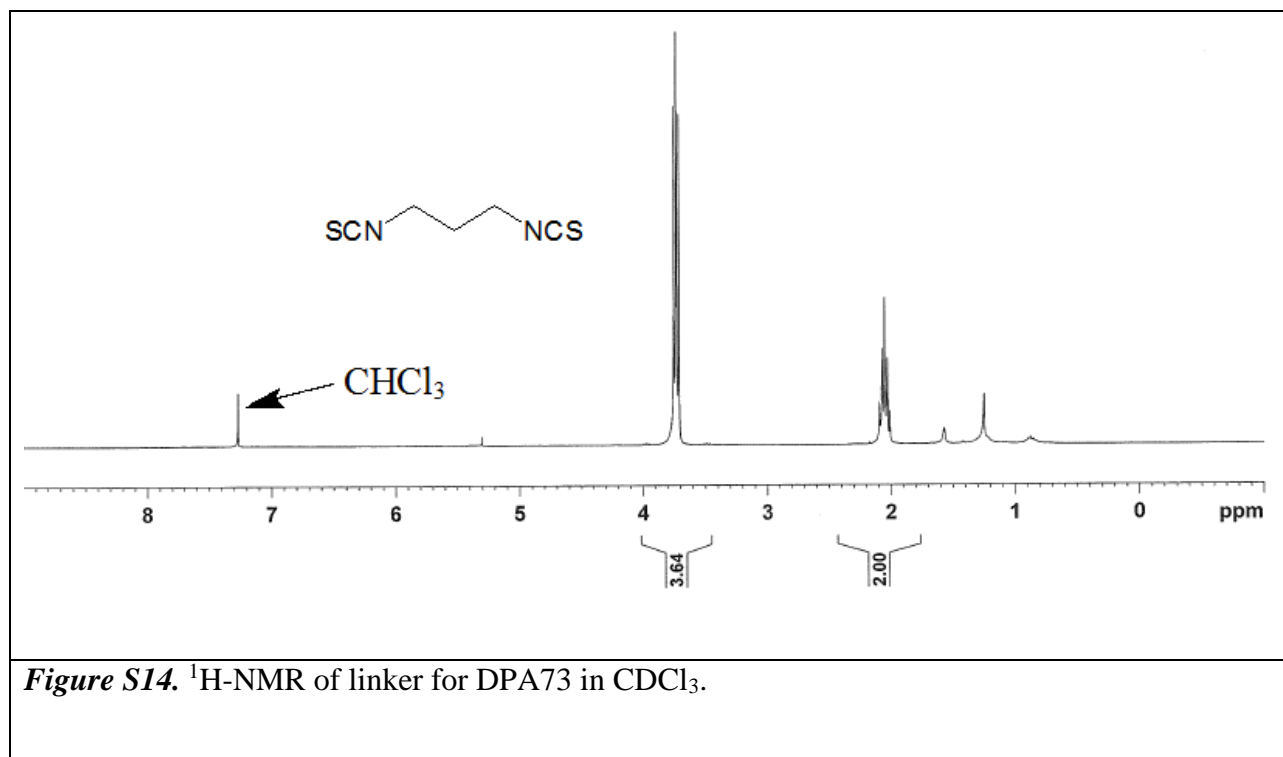

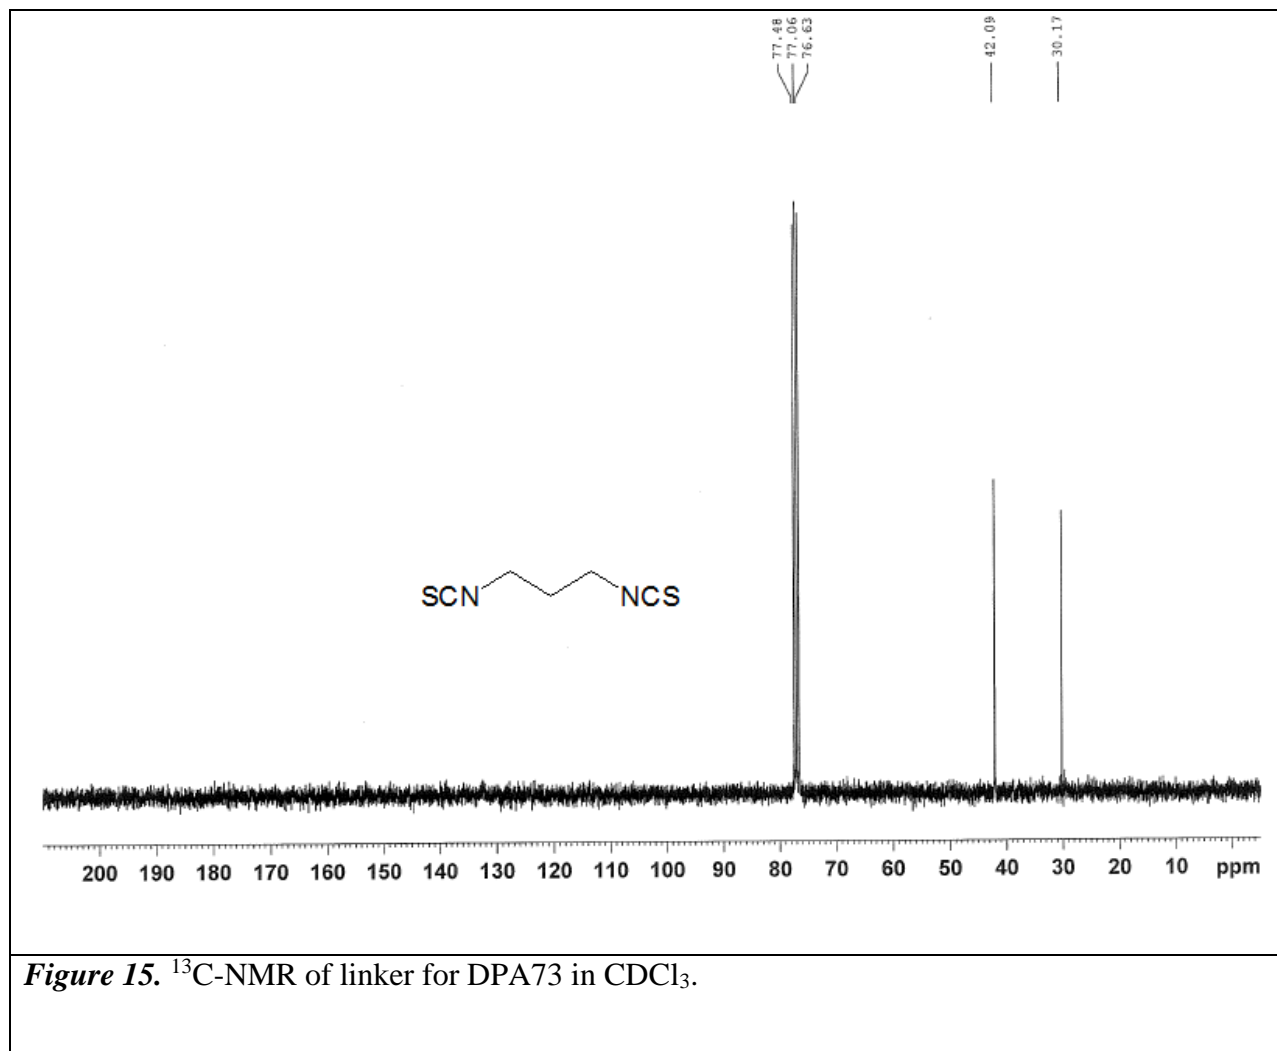

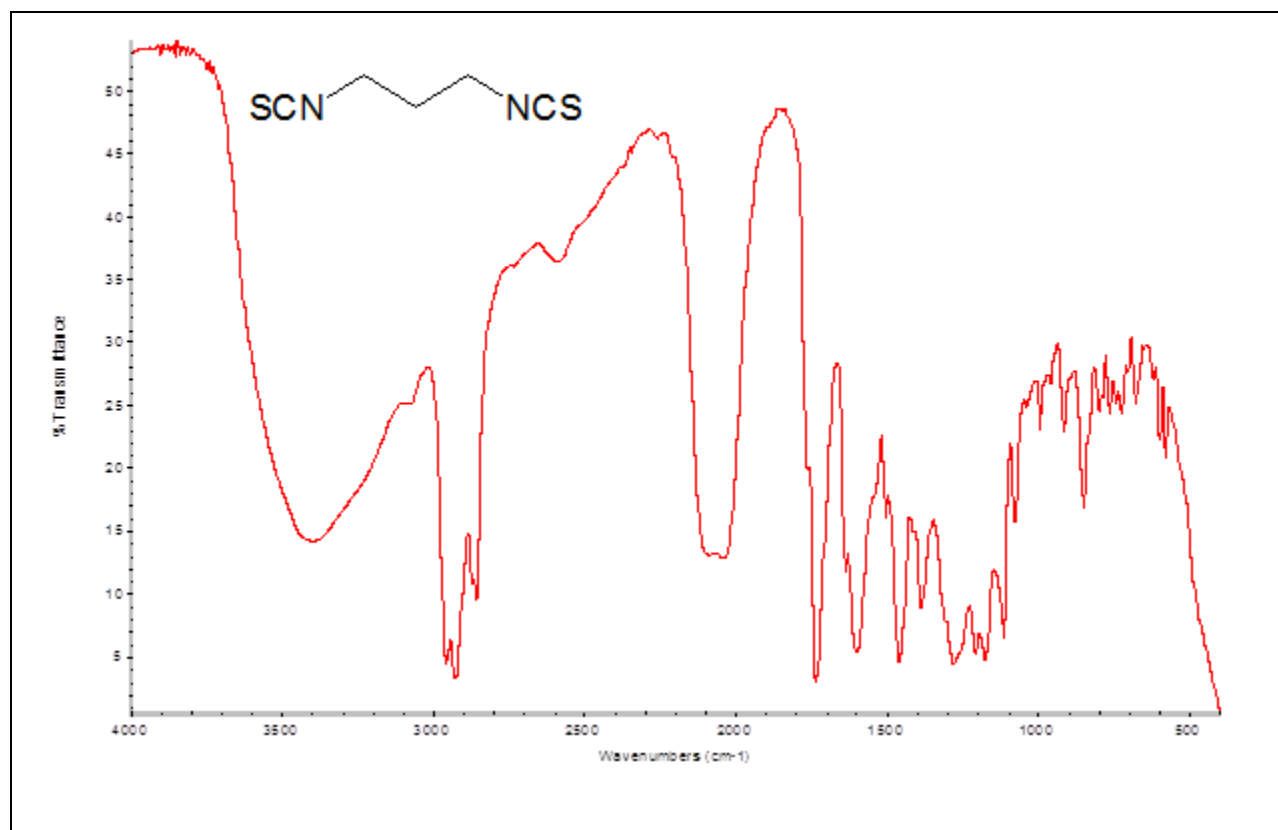

**Figure S16.** IR of linker for DPA73.

DPA73.

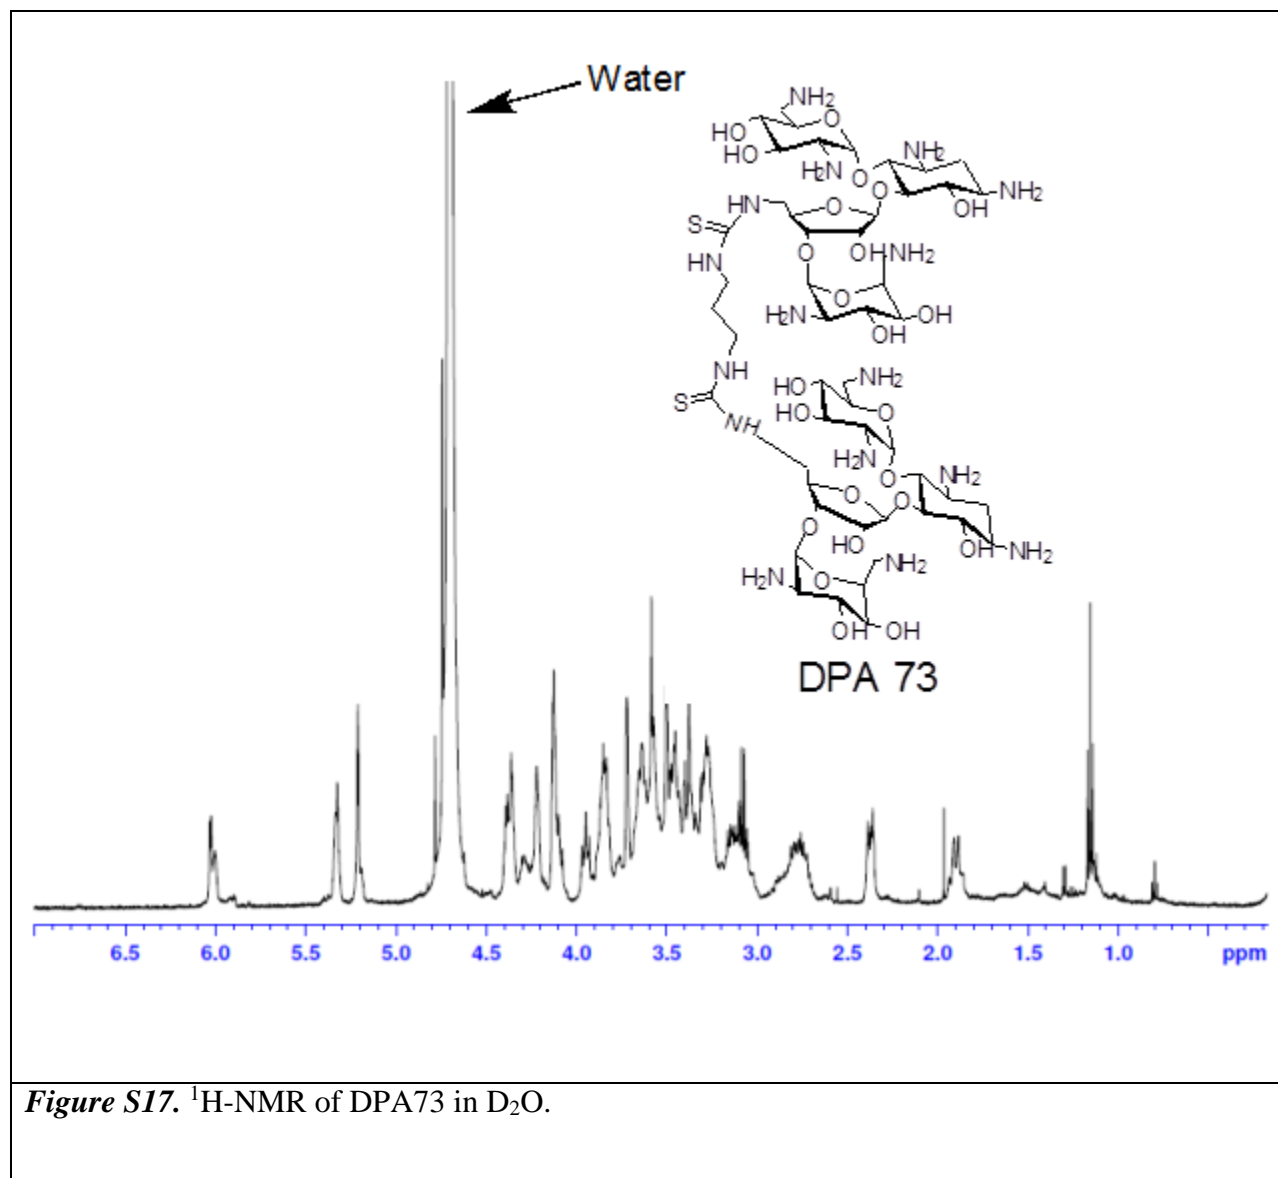

**Figure S17.**  $^1\text{H-NMR}$  of DPA73 in  $\text{D}_2\text{O}$ .

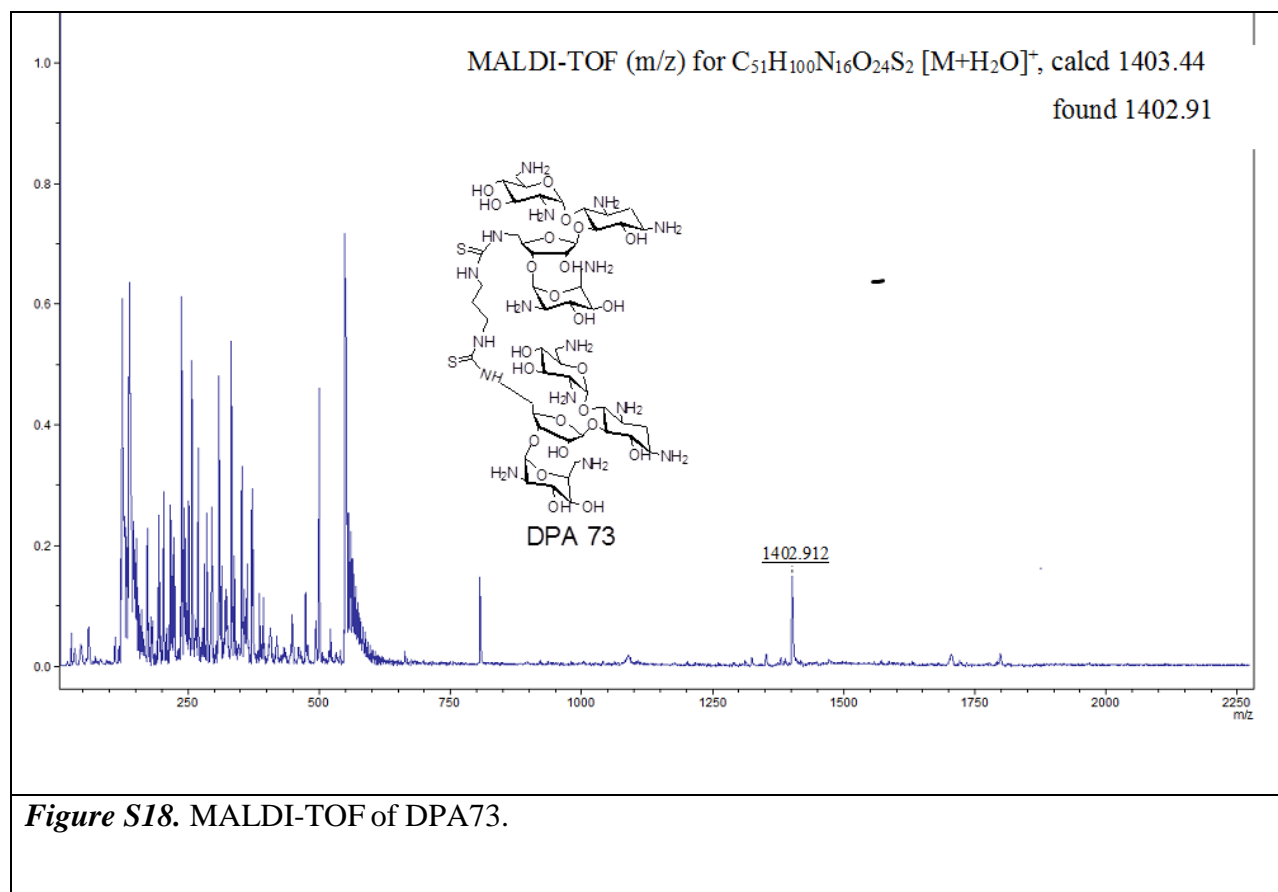

**Figure S18.** MALDI-TOF of DPA73.

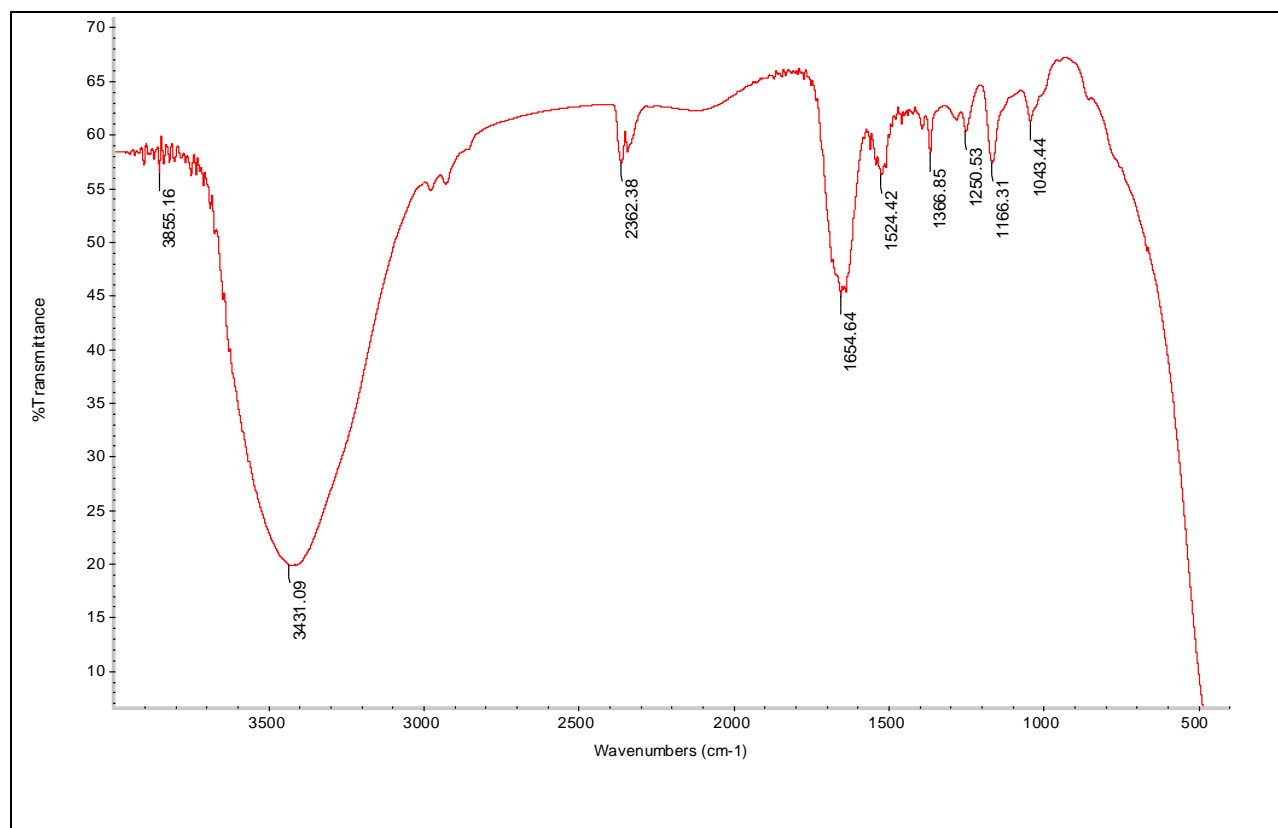

**Figure S19.** IR of DPA73.

N-Boc DPA 74.

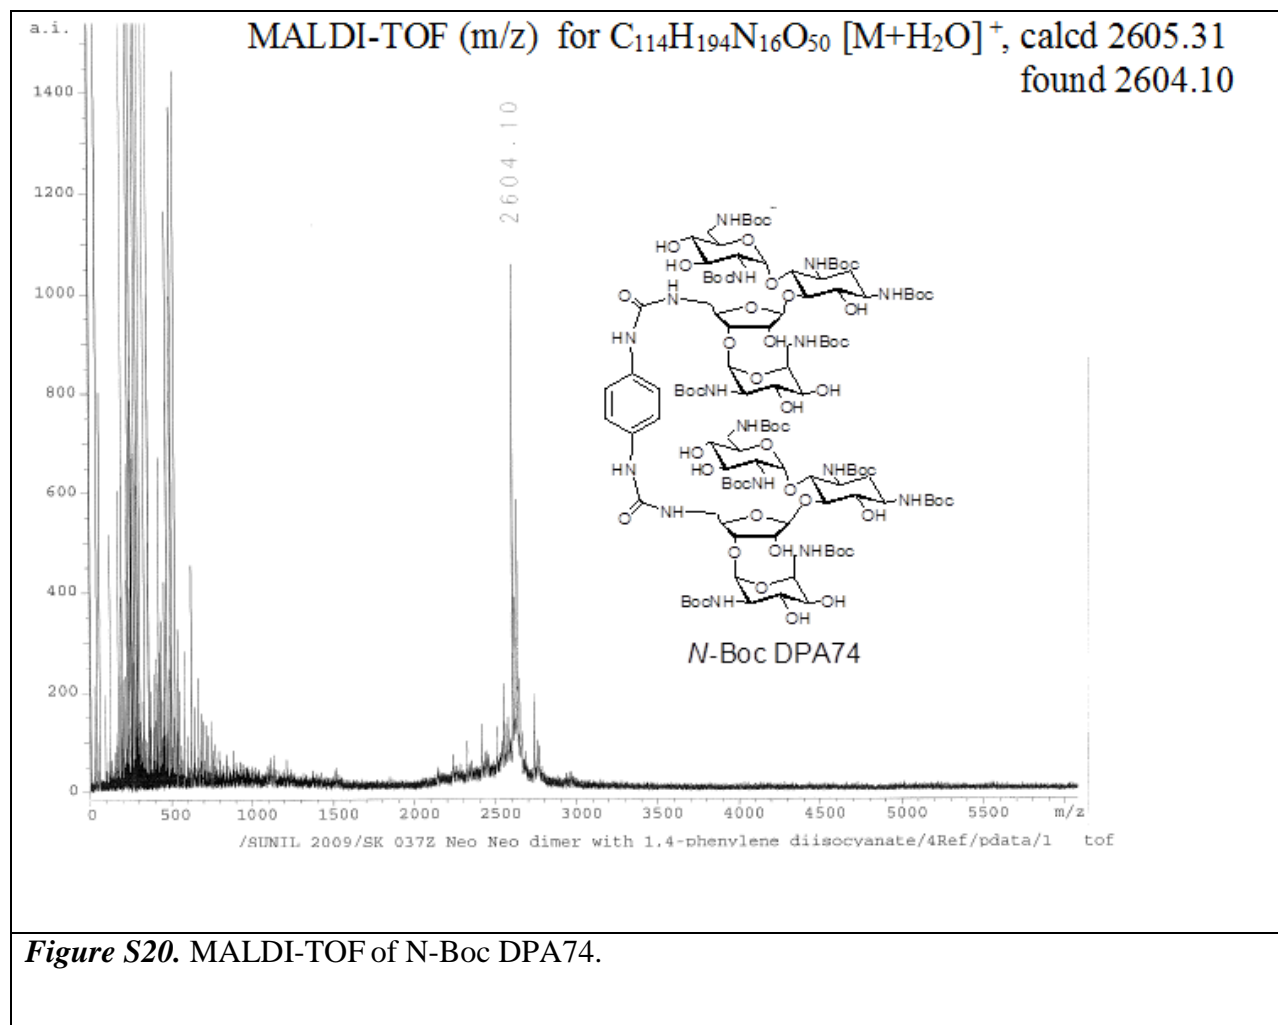

**Figure S20.** MALDI-TOF of N-Boc DPA74.

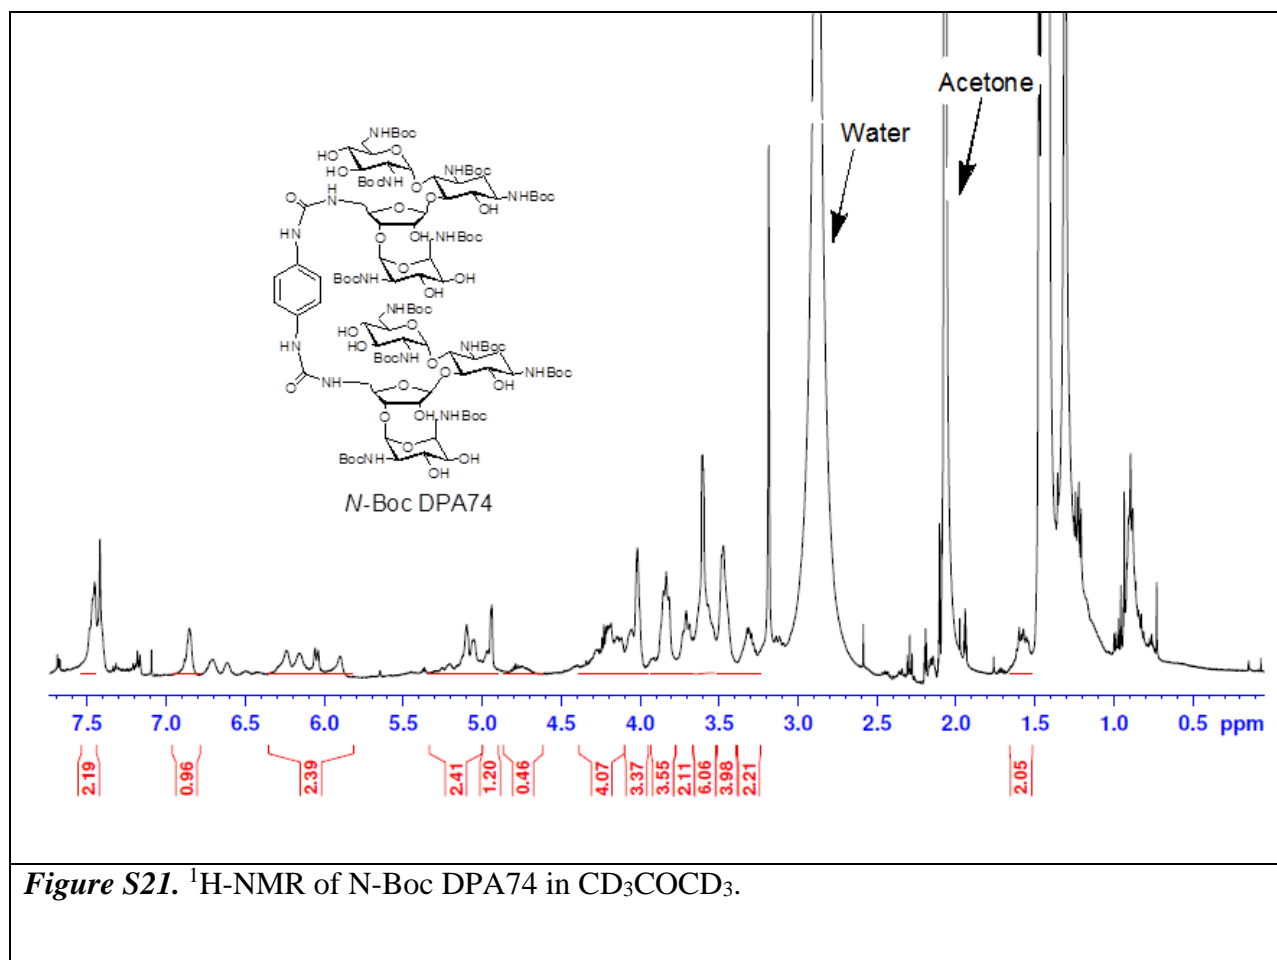

**Figure S21.** <sup>1</sup>H-NMR of N-Boc DPA74 in CD<sub>3</sub>COCD<sub>3</sub>.



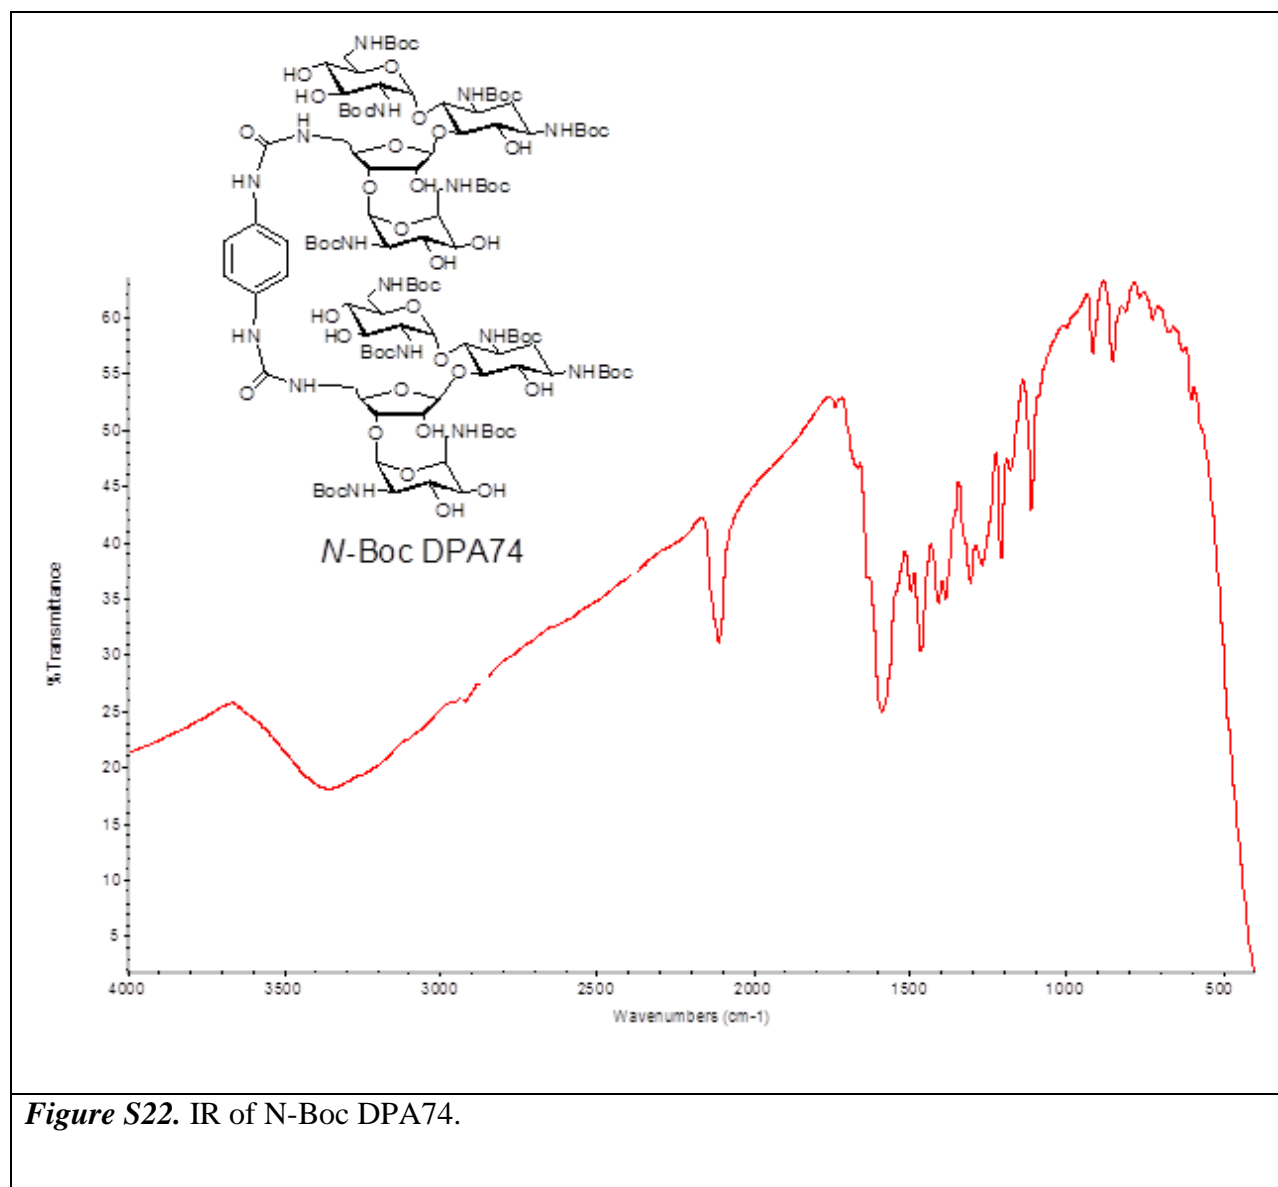

DPA74.

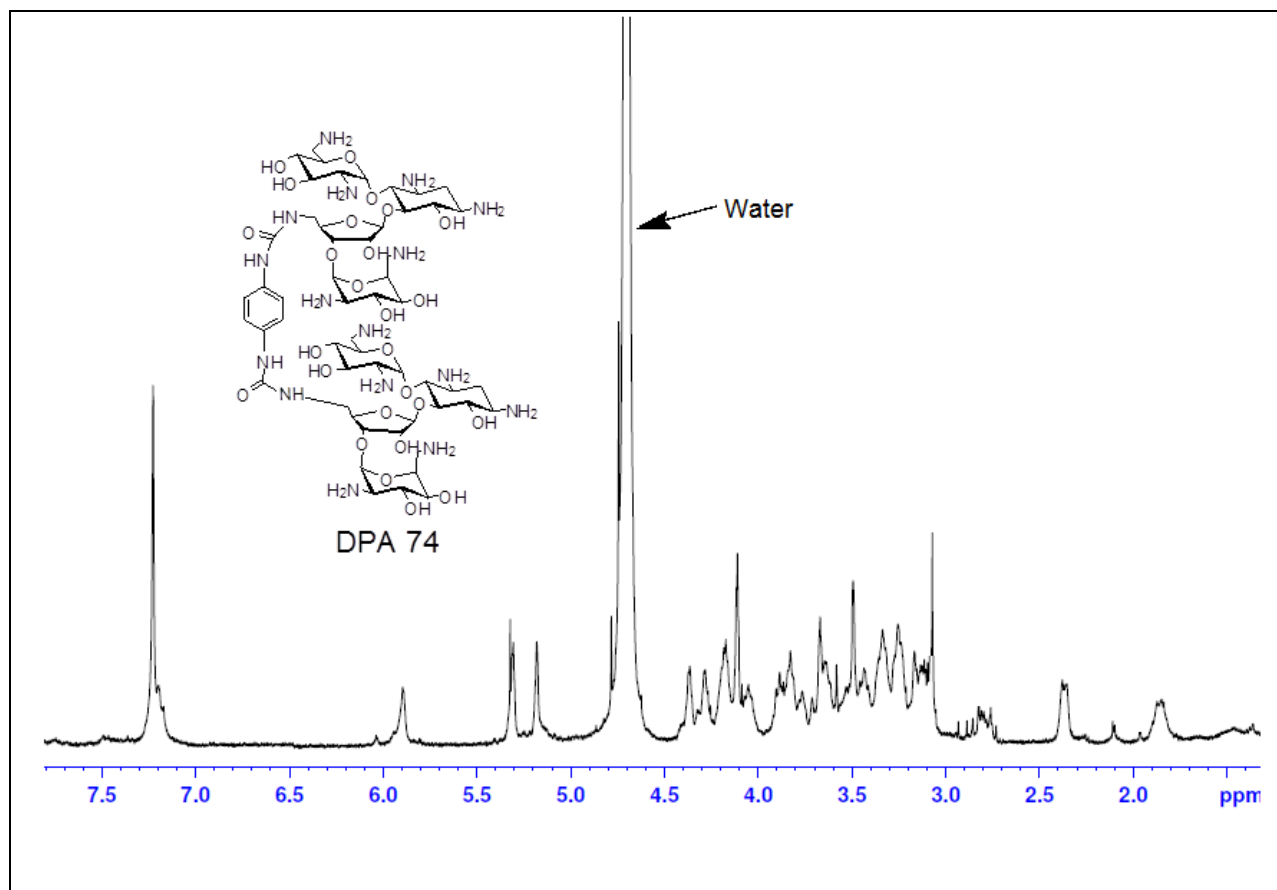

**Figure S23.** <sup>1</sup>H-NMR of DPA74 in D<sub>2</sub>O.

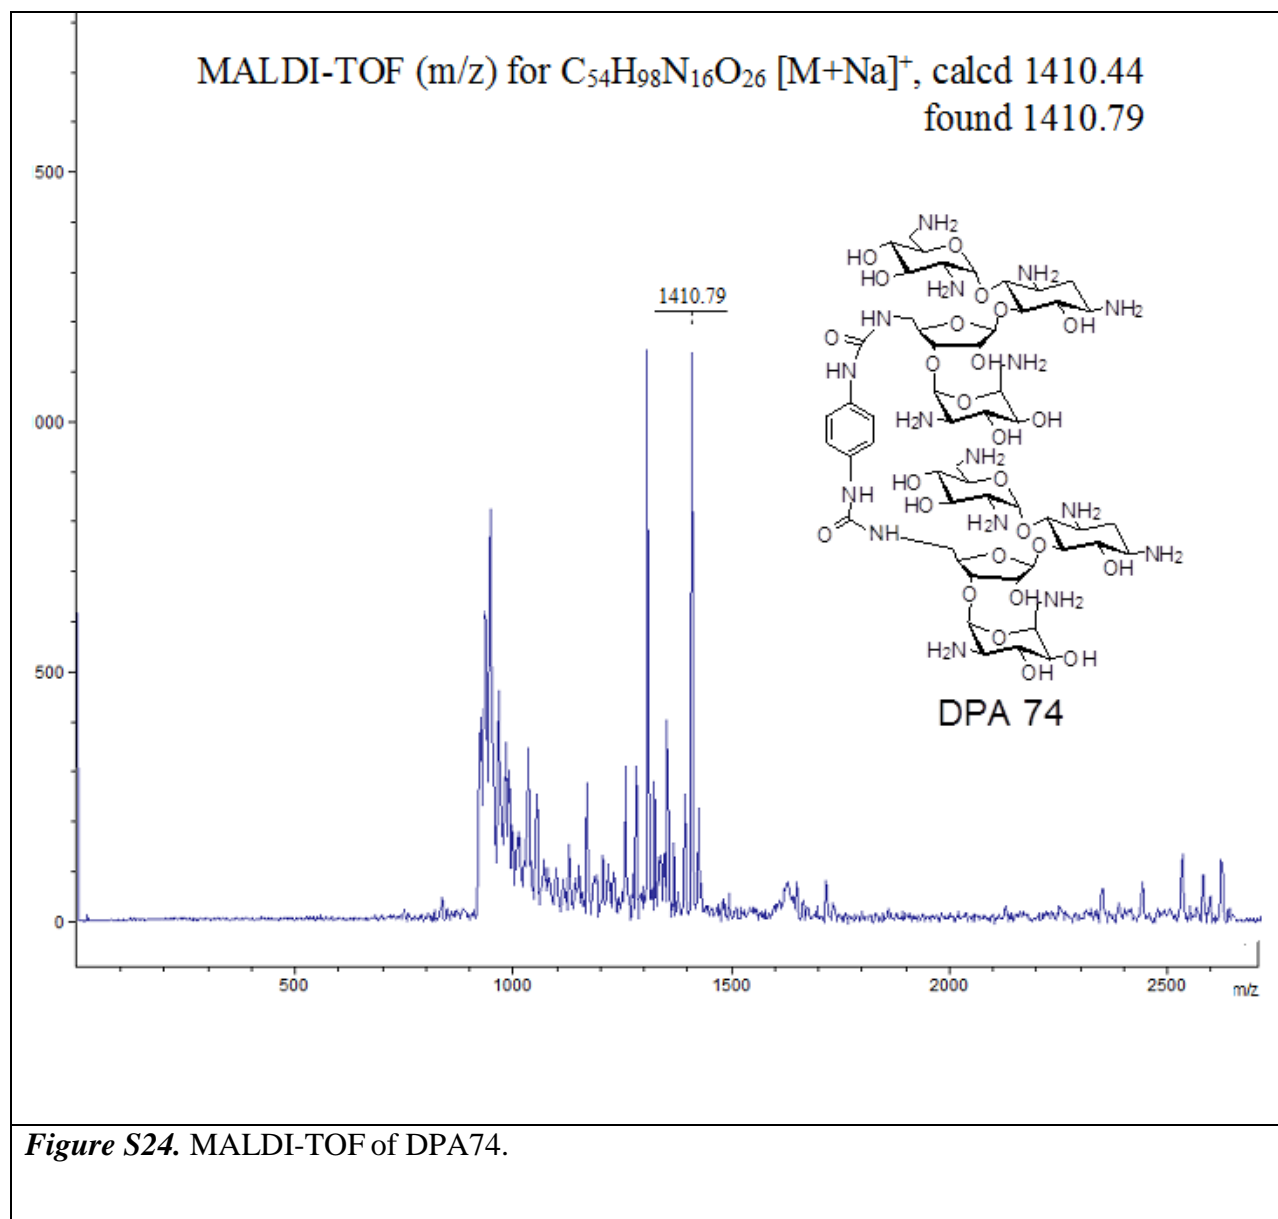

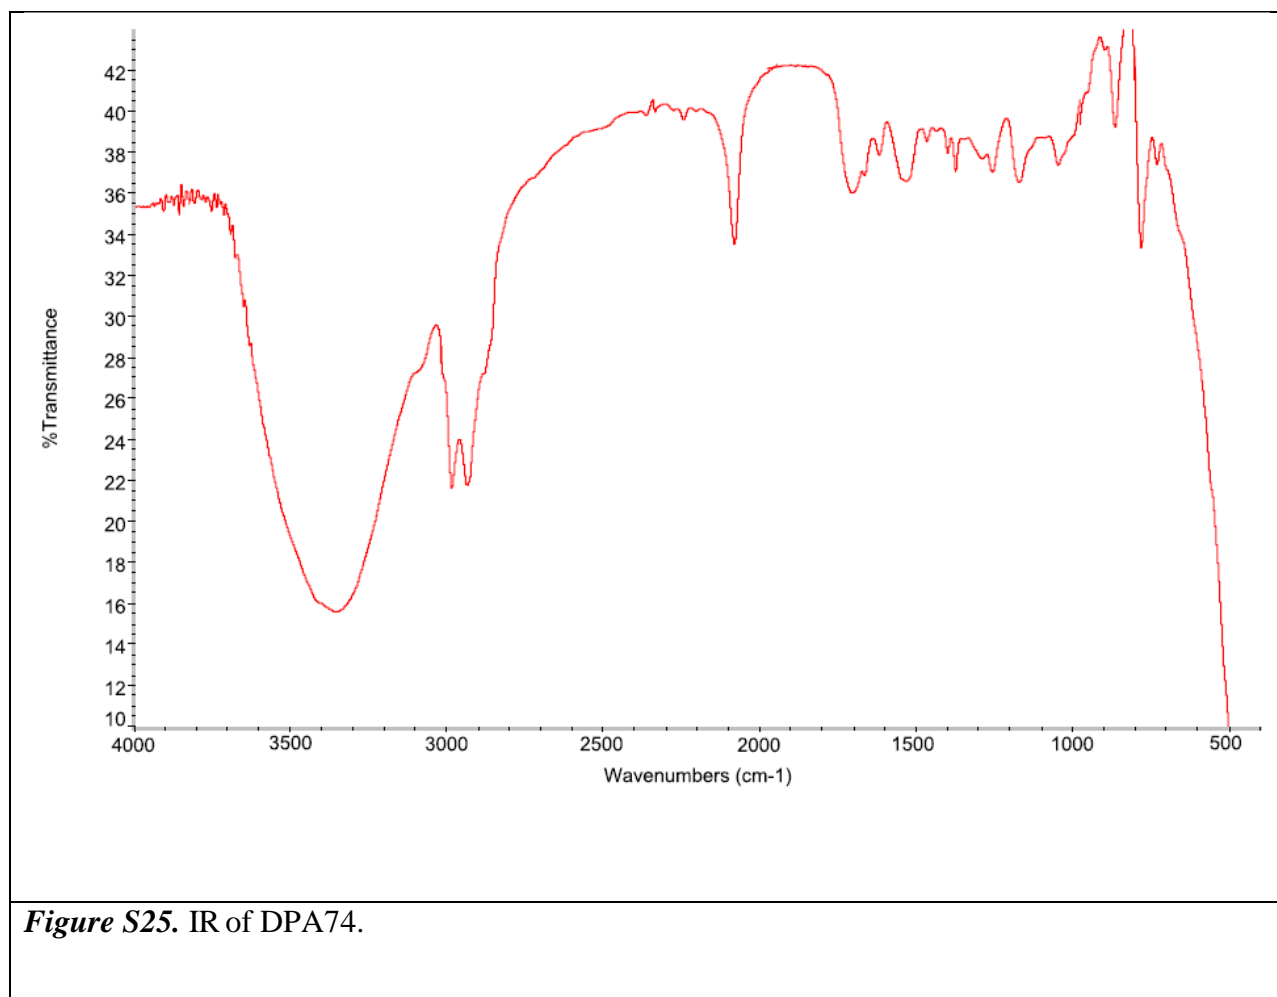

**Figure S25.** IR of DPA74.

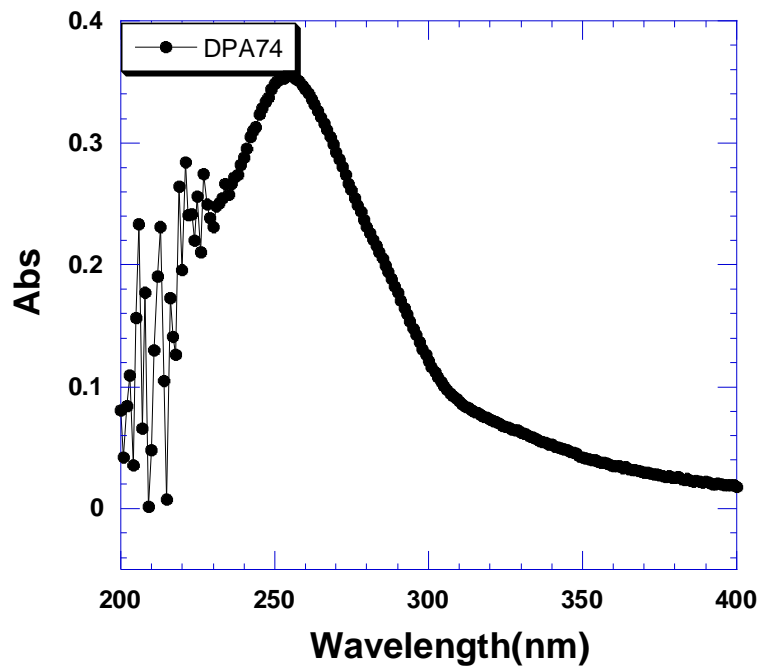

**Figure S26.** UV absorbance scan of DPA74. Scan was taken in water and the concentration of DPA74 was 25  $\mu\text{M}$ . T = 25  $^{\circ}\text{C}$ .

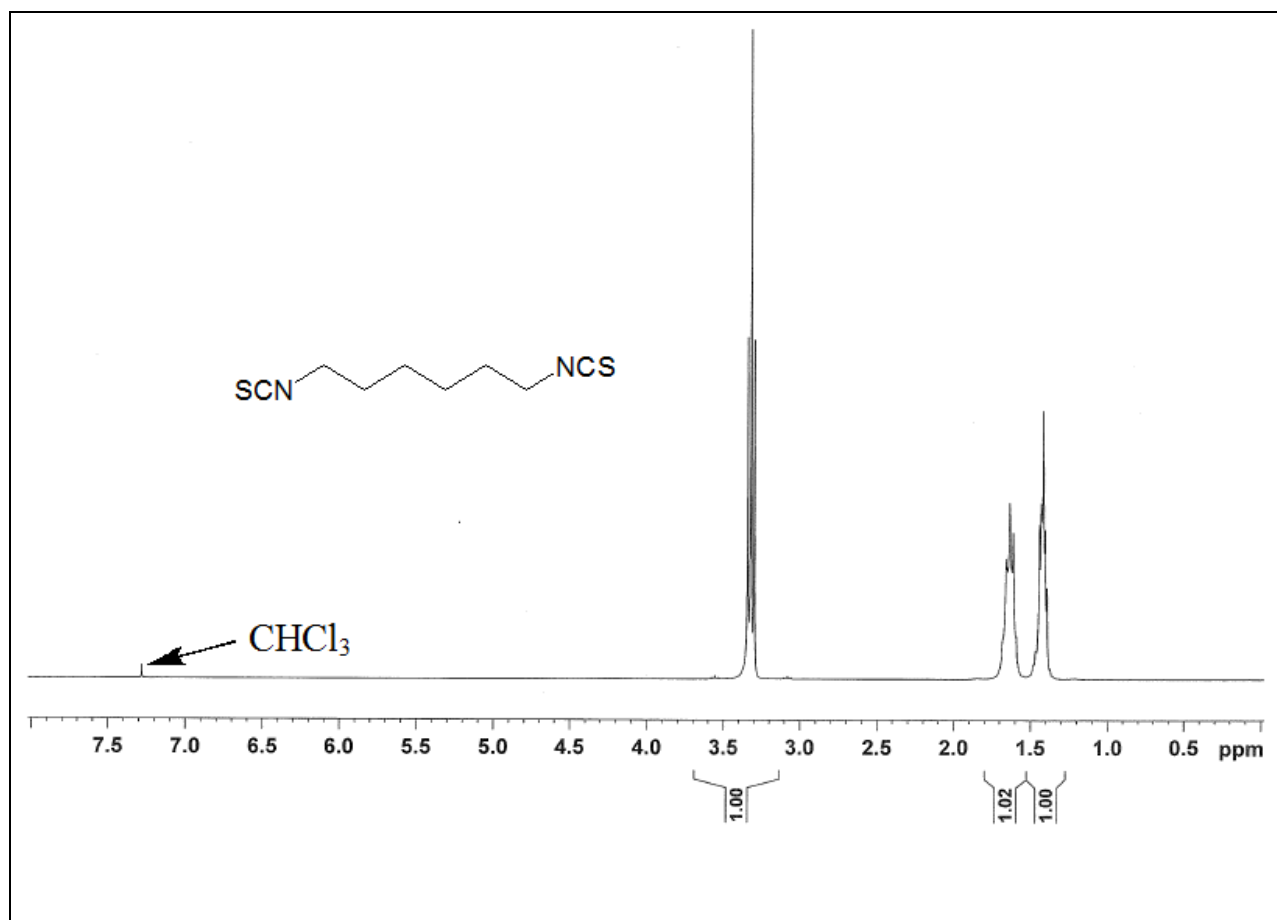

**Figure 27.** <sup>1</sup>H-NMR of linker for N-Boc DPA75 in CDCl<sub>3</sub>.

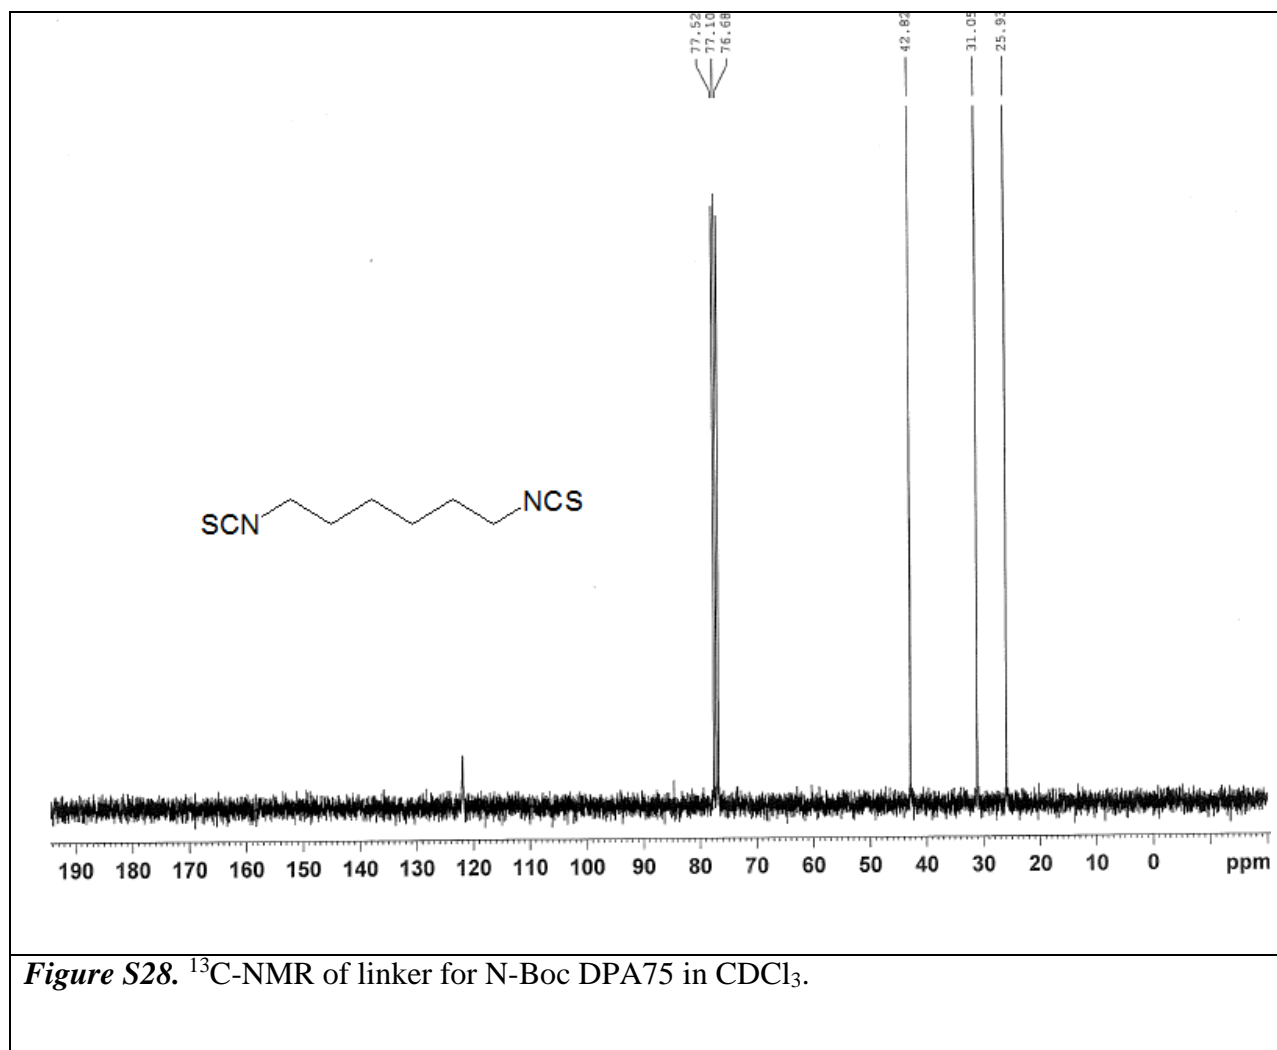

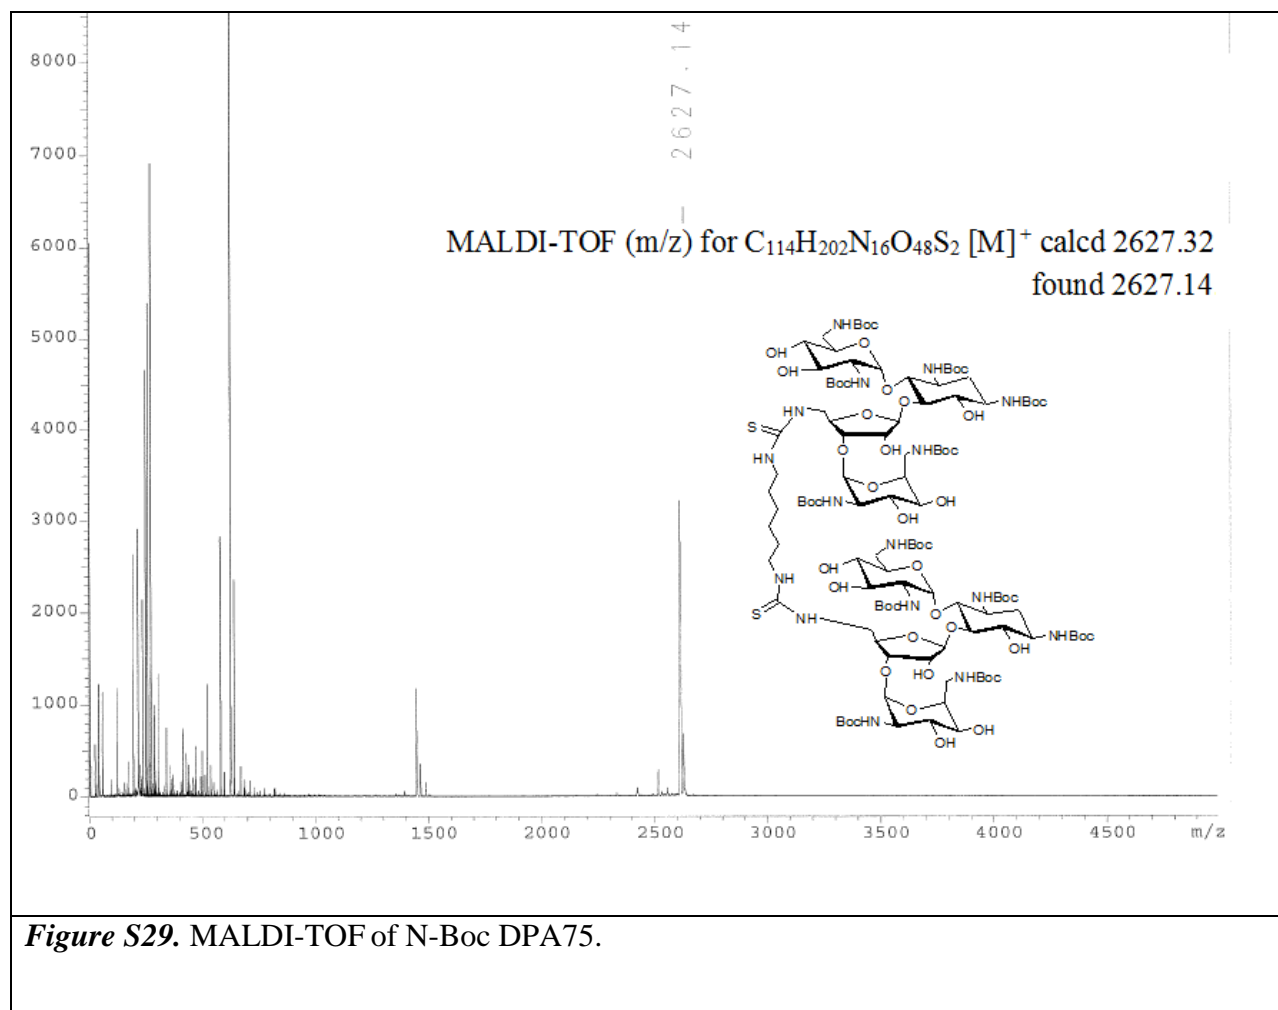

**Figure S29.** MALDI-TOF of N-Boc DPA75.



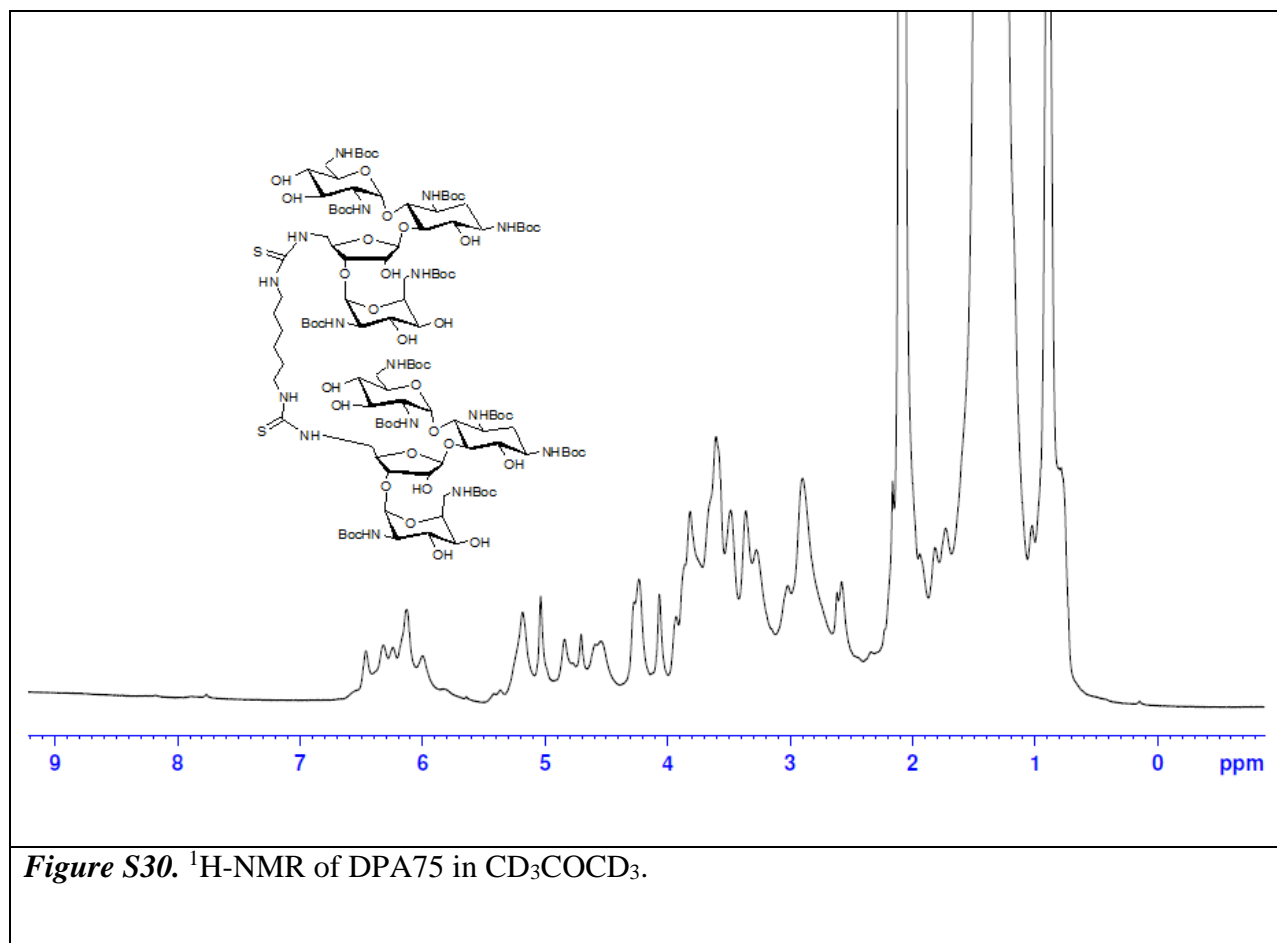

**Figure S30.**  $^1\text{H-NMR}$  of DPA75 in  $\text{CD}_3\text{COCD}_3$ .

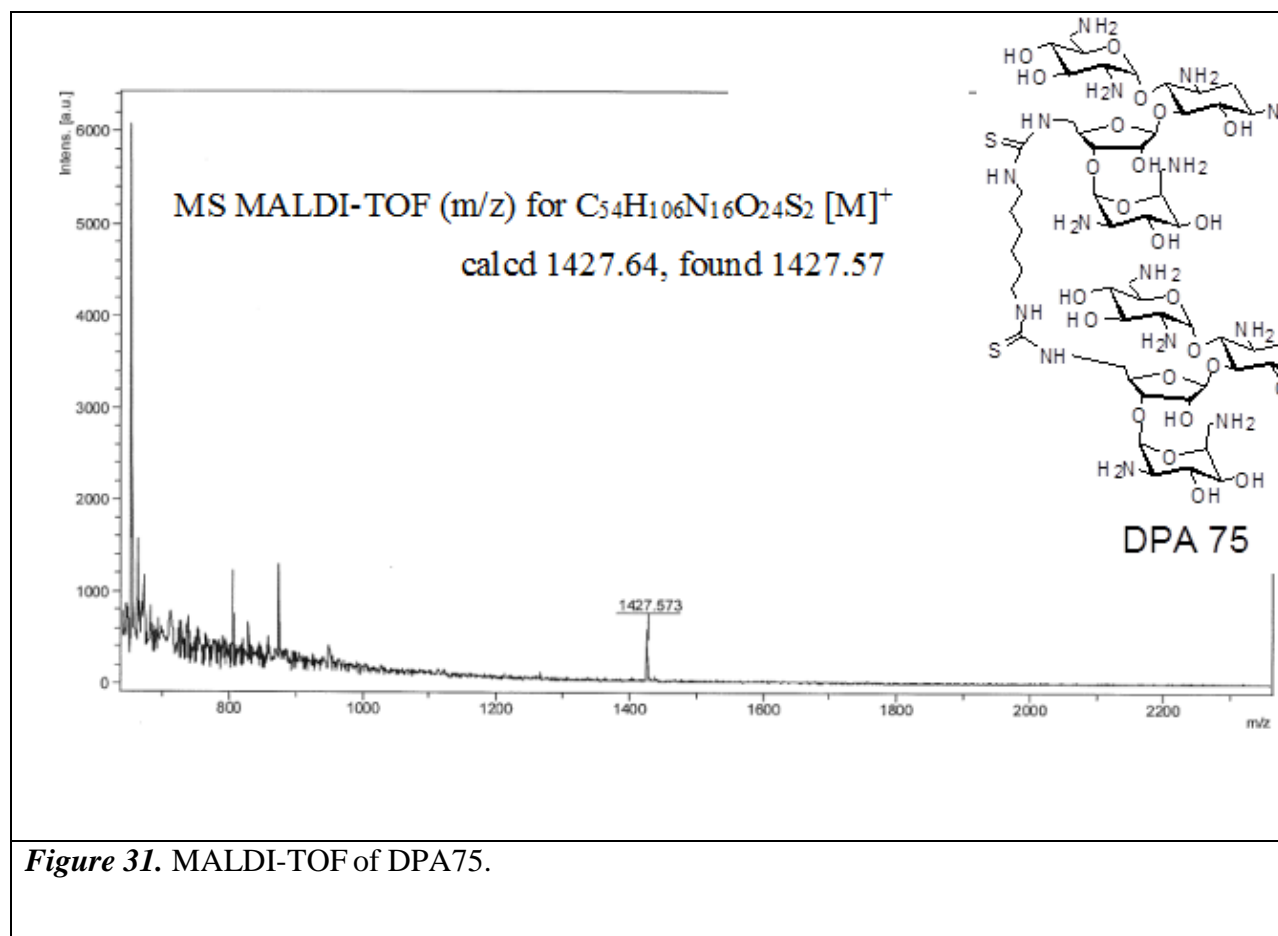

**Figure 31.** MALDI-TOF of DPA75.

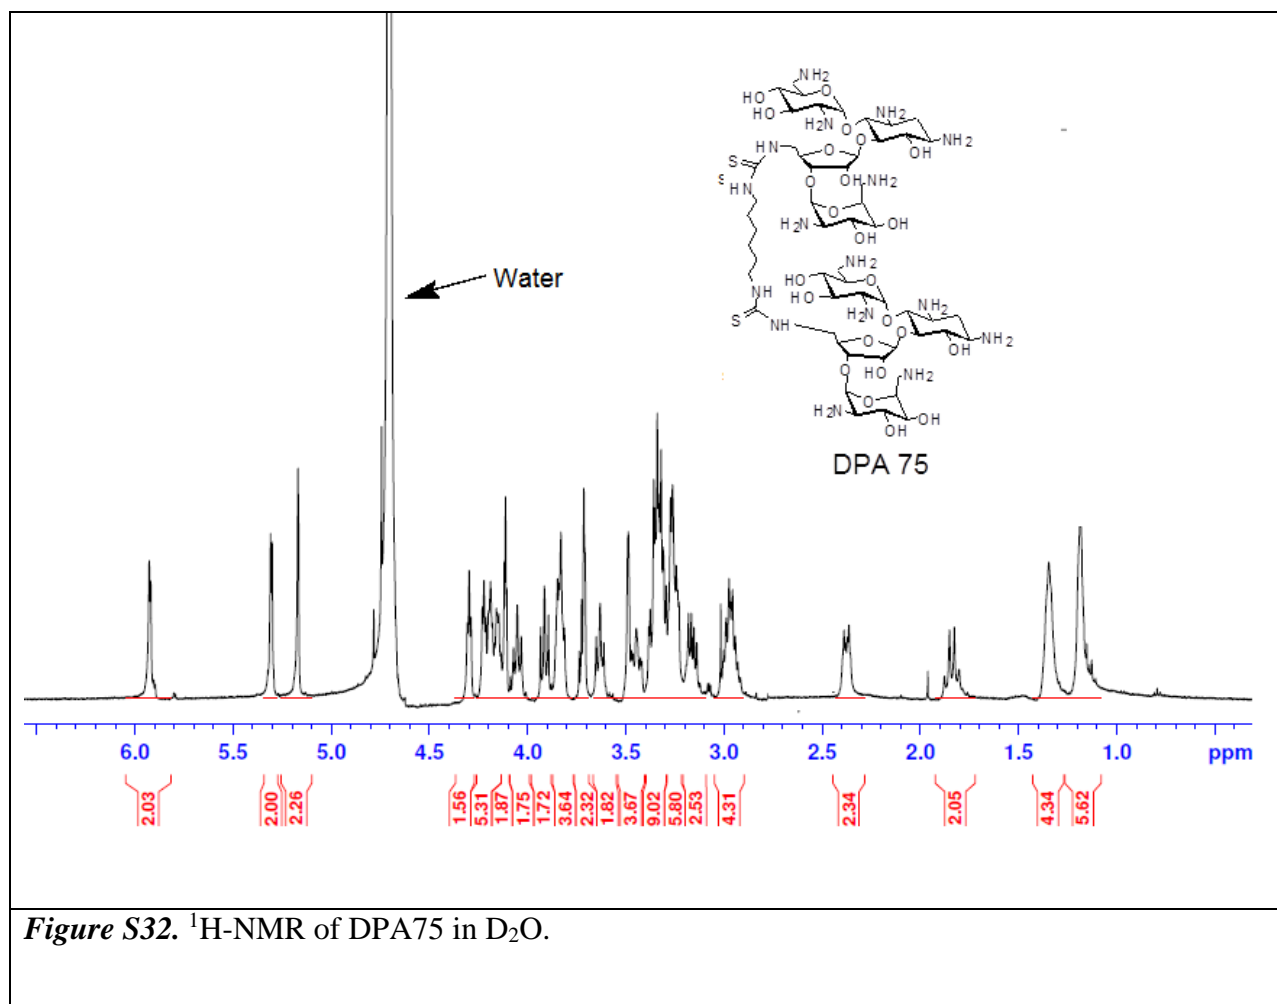

**Figure S32.** <sup>1</sup>H-NMR of DPA75 in D<sub>2</sub>O.

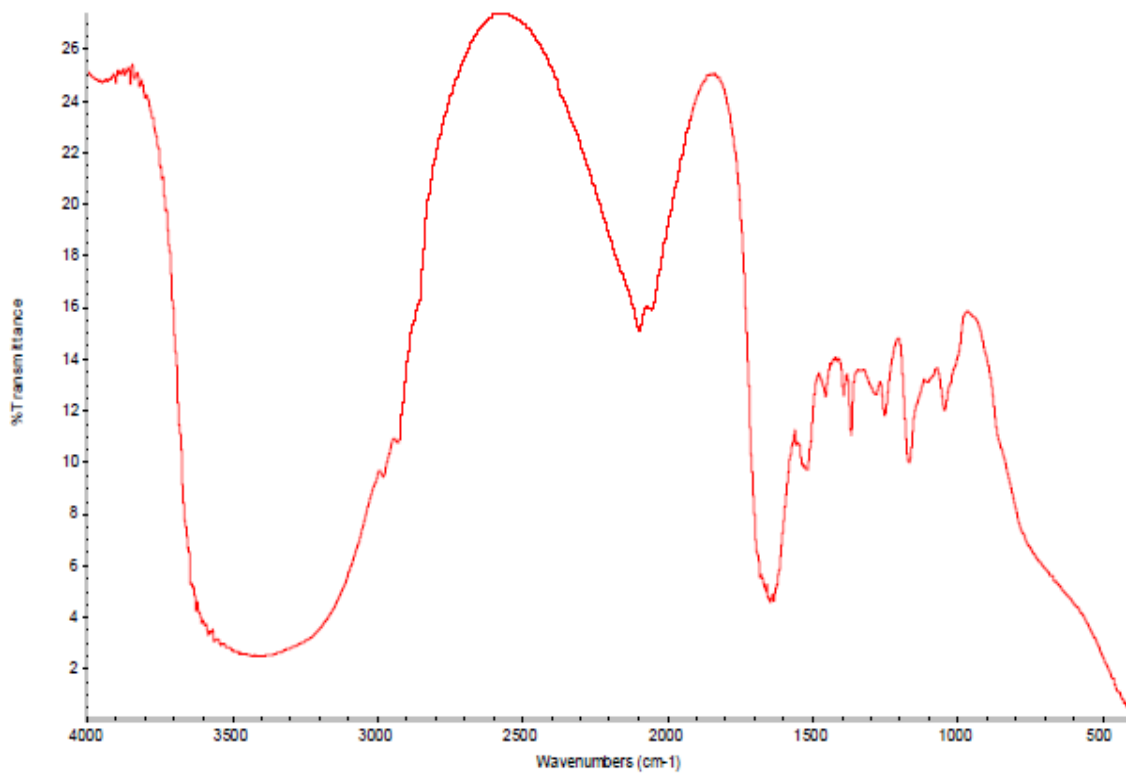

*Figure S33.* IR of DPA75.

N-Boc DPA 76.

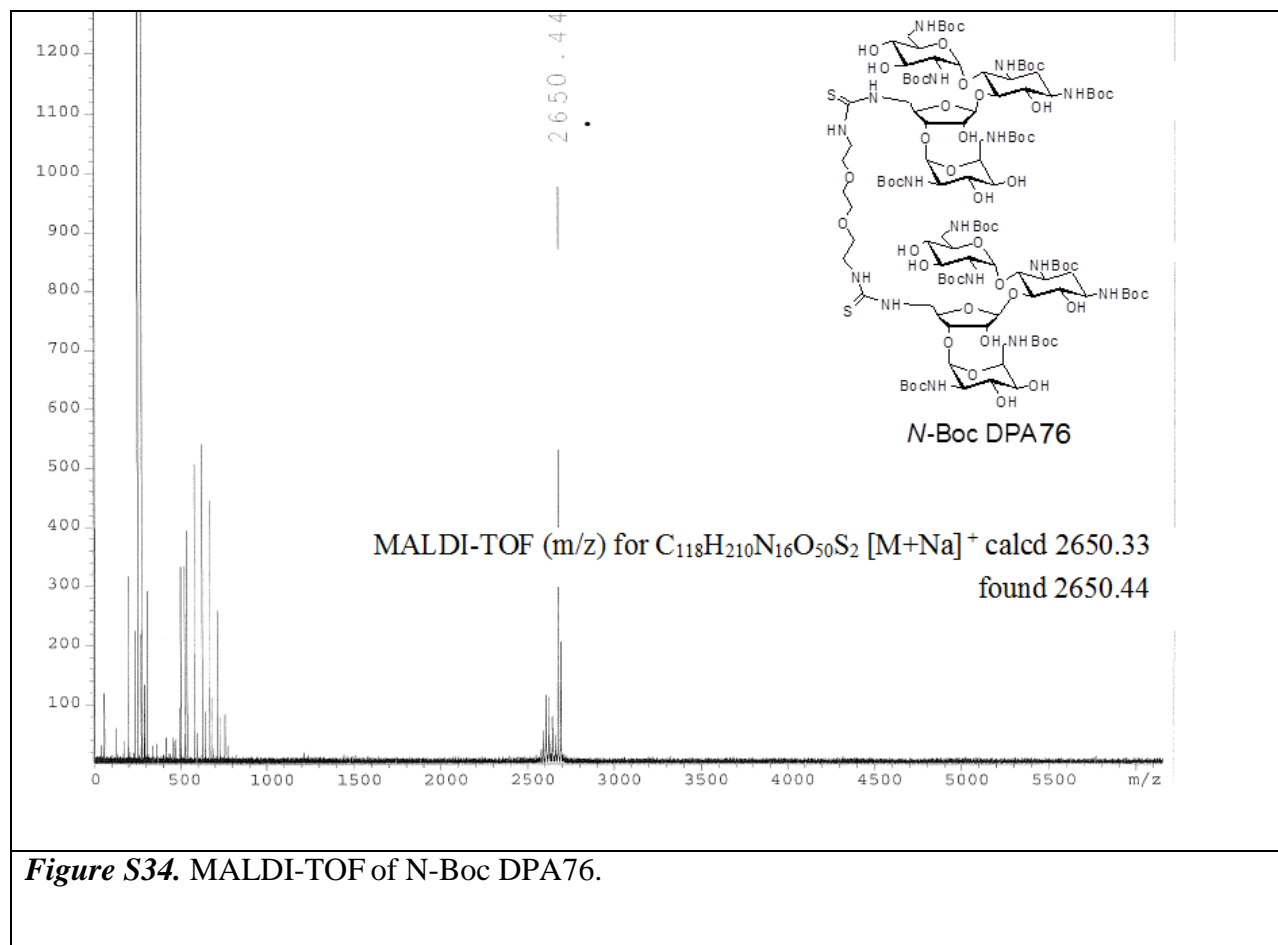

**Figure S34.** MALDI-TOF of N-Boc DPA76.

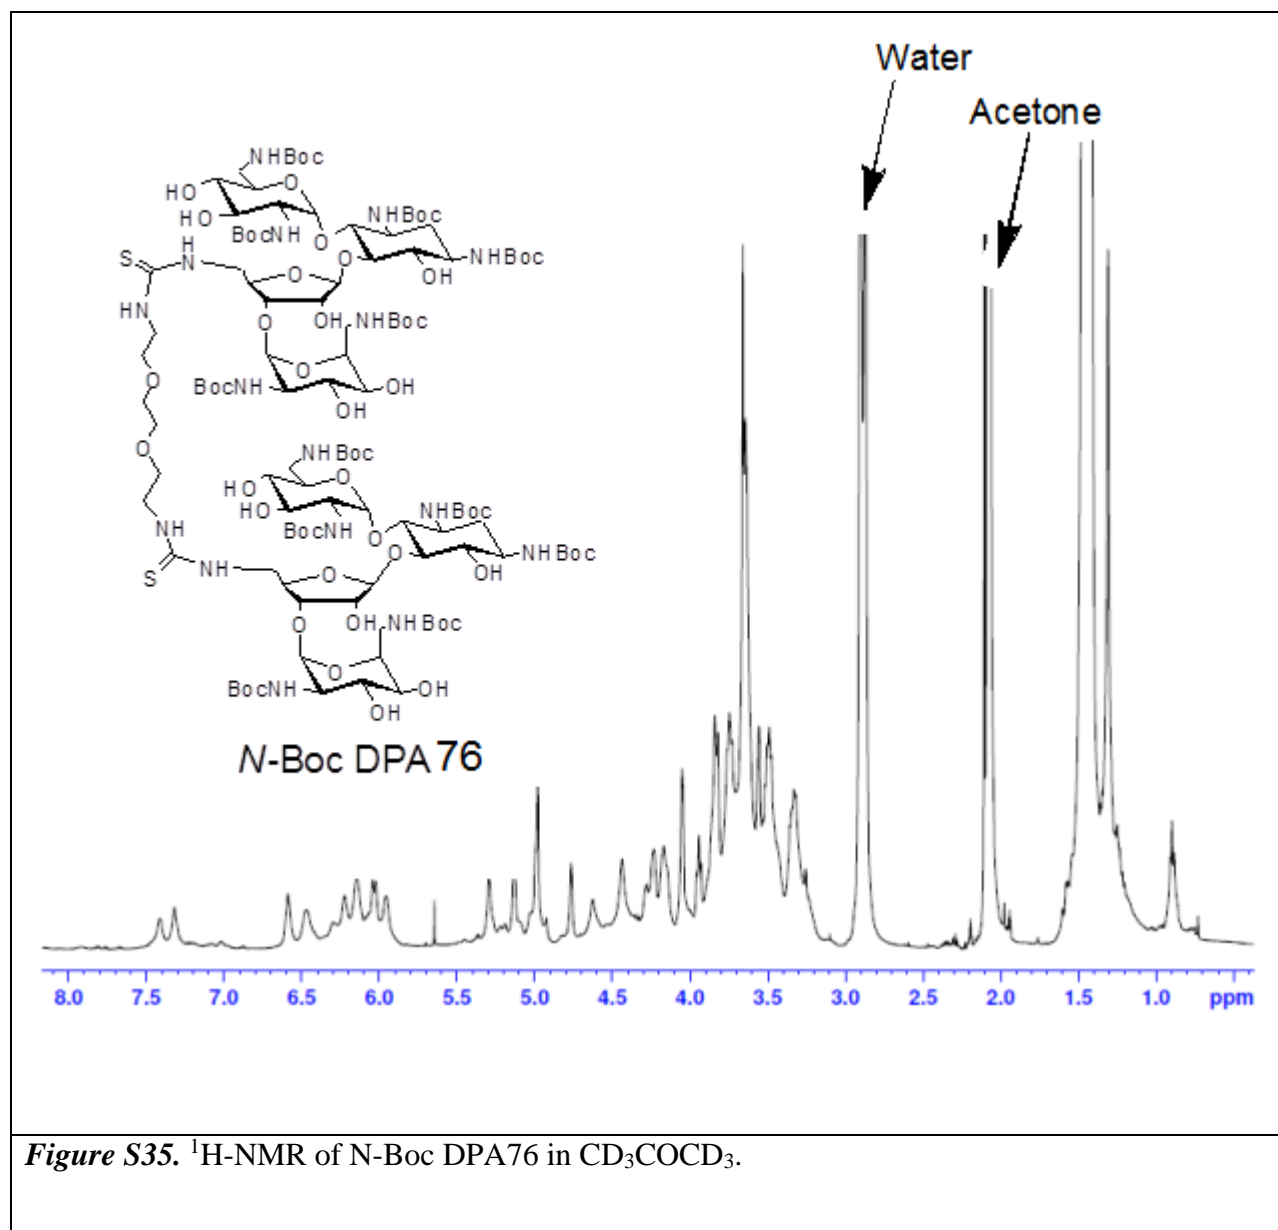

**Figure S35.** <sup>1</sup>H-NMR of *N*-Boc DPA76 in CD<sub>3</sub>COCD<sub>3</sub>.

DPA76.

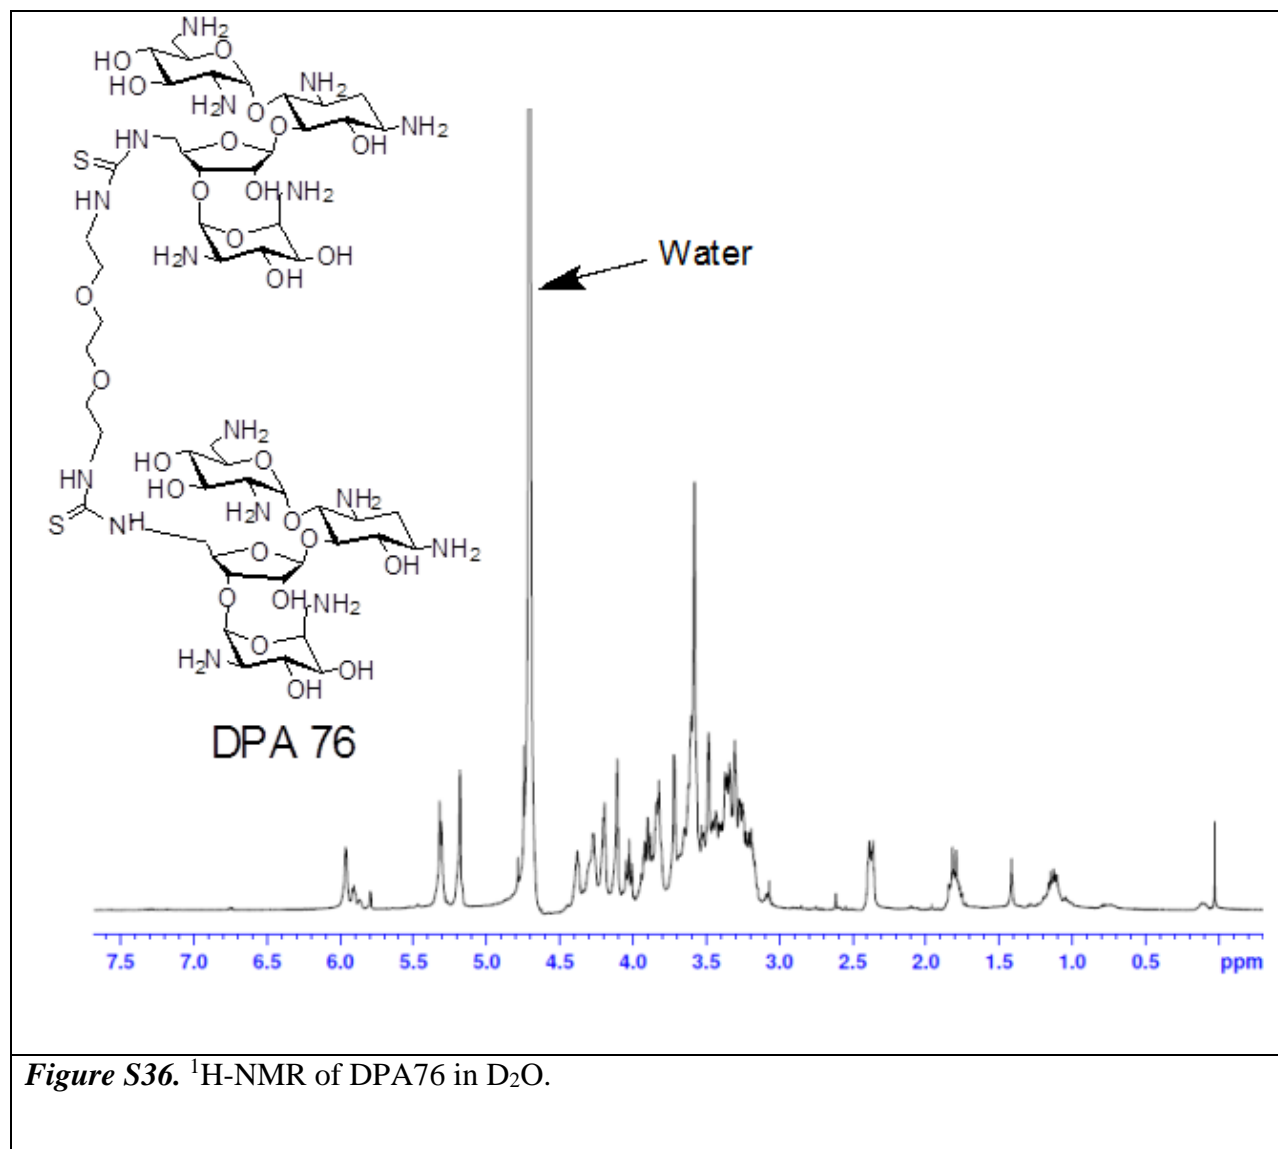

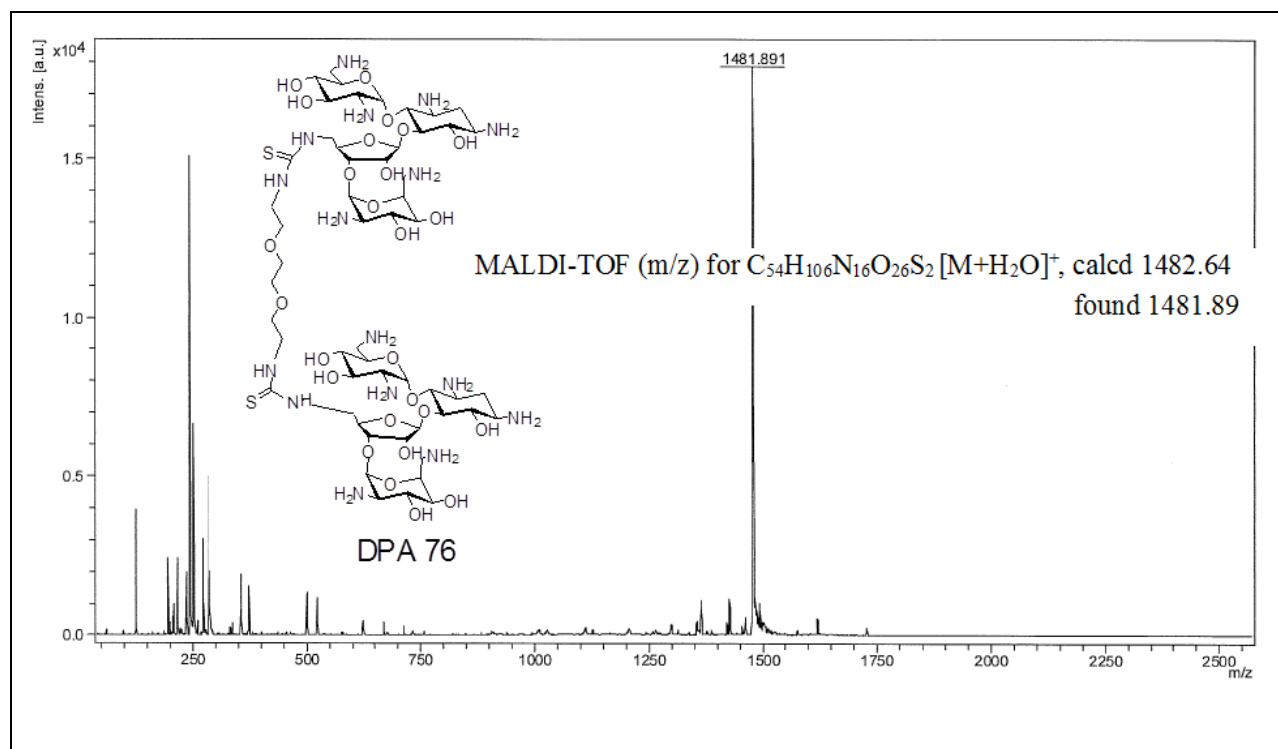

**Figure S37.** MALDI-TOF of DPA76.



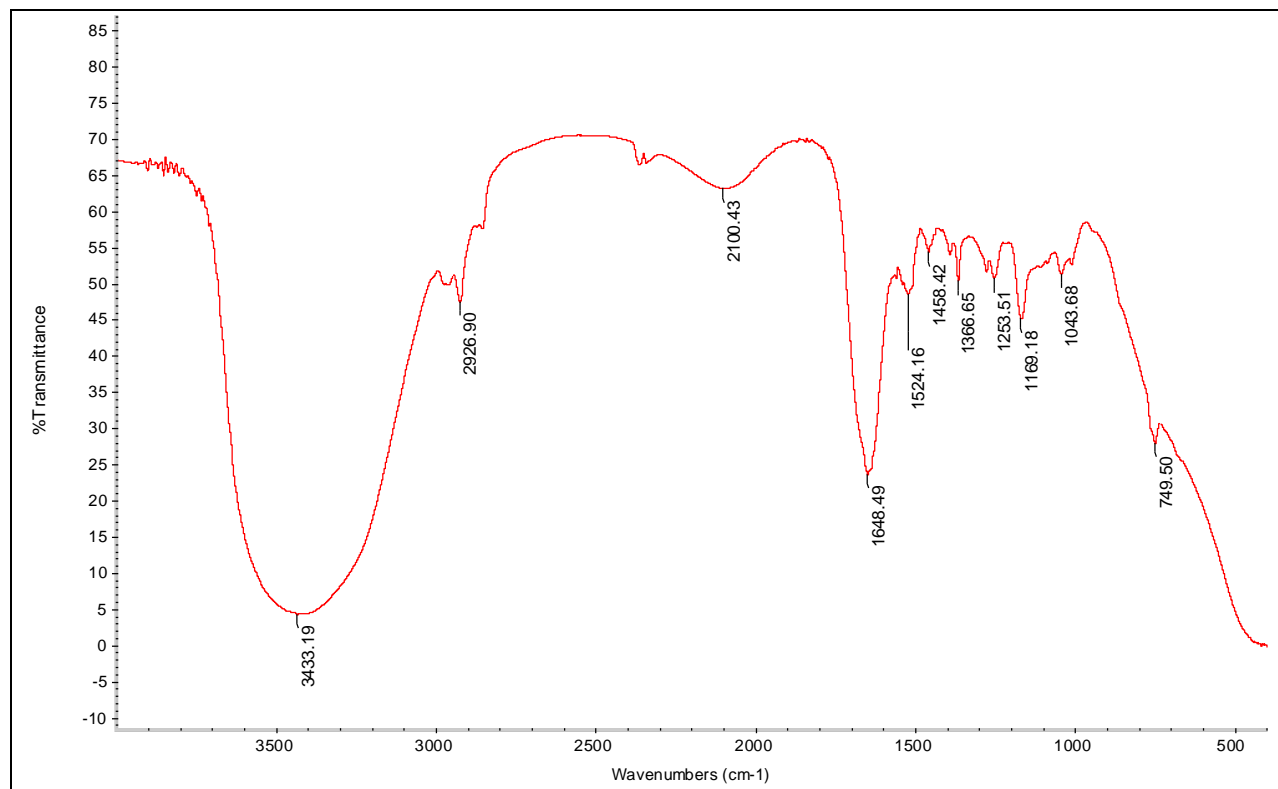

**Figure S38.** IR of DPA76.

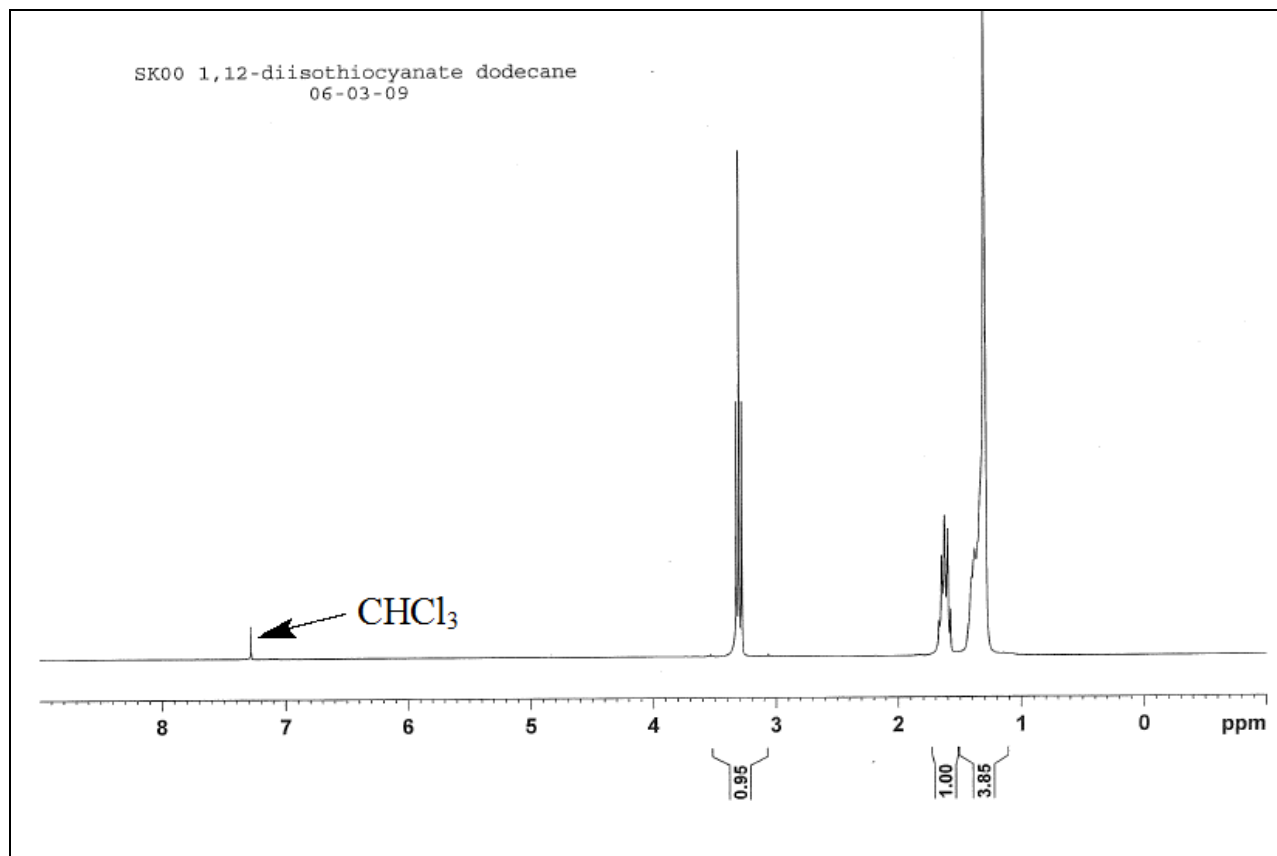

**Figure S39.** <sup>1</sup>H-NMR of linker for N-Boc DPA77 in CDCl<sub>3</sub>.

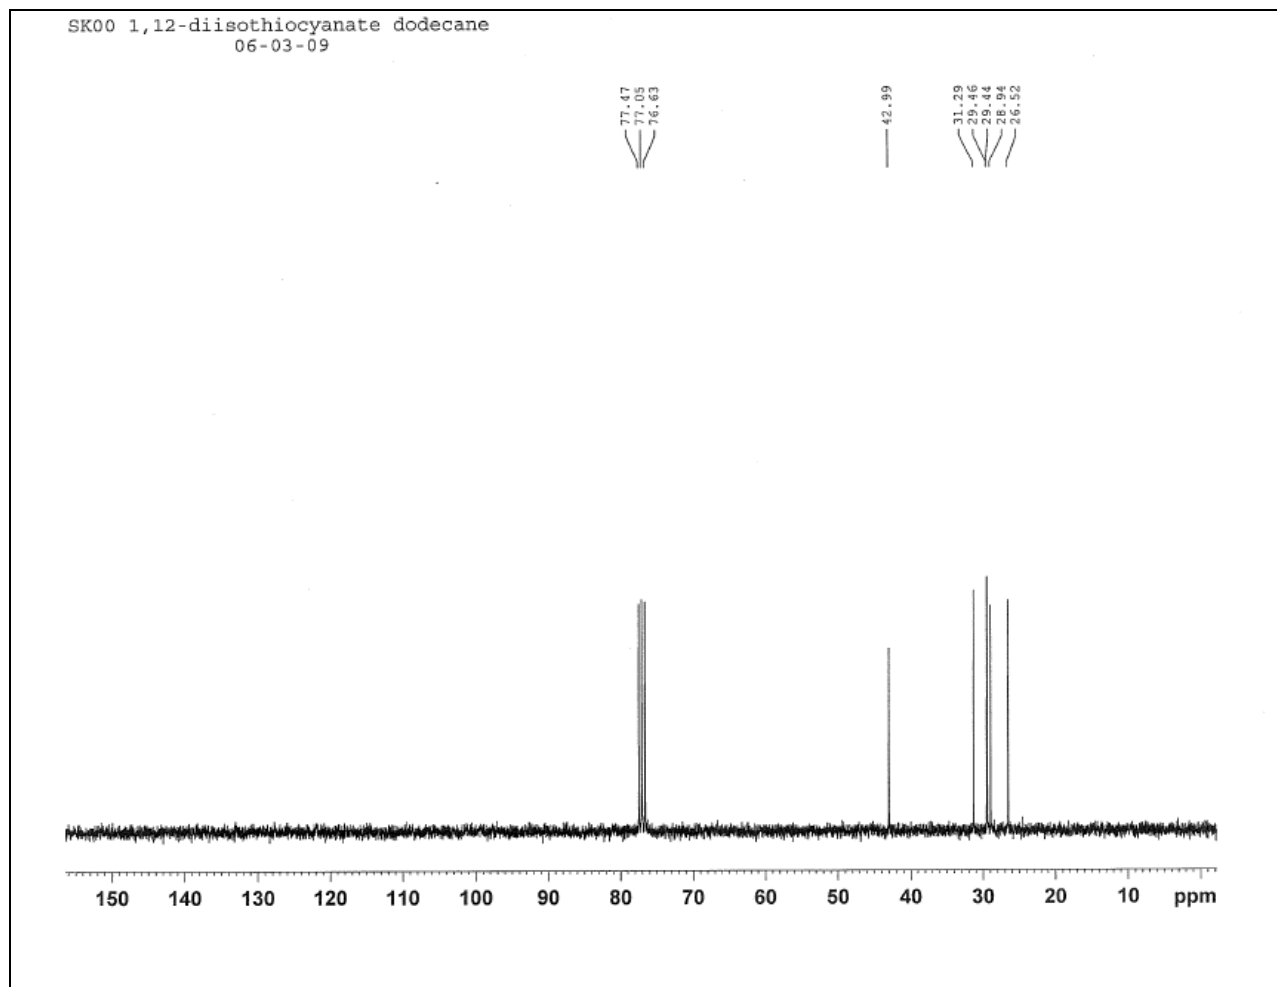

**Figure S40.**  $^{13}\text{C}$ -NMR of linker for N-Boc DPA77 in  $\text{CDCl}_3$ .

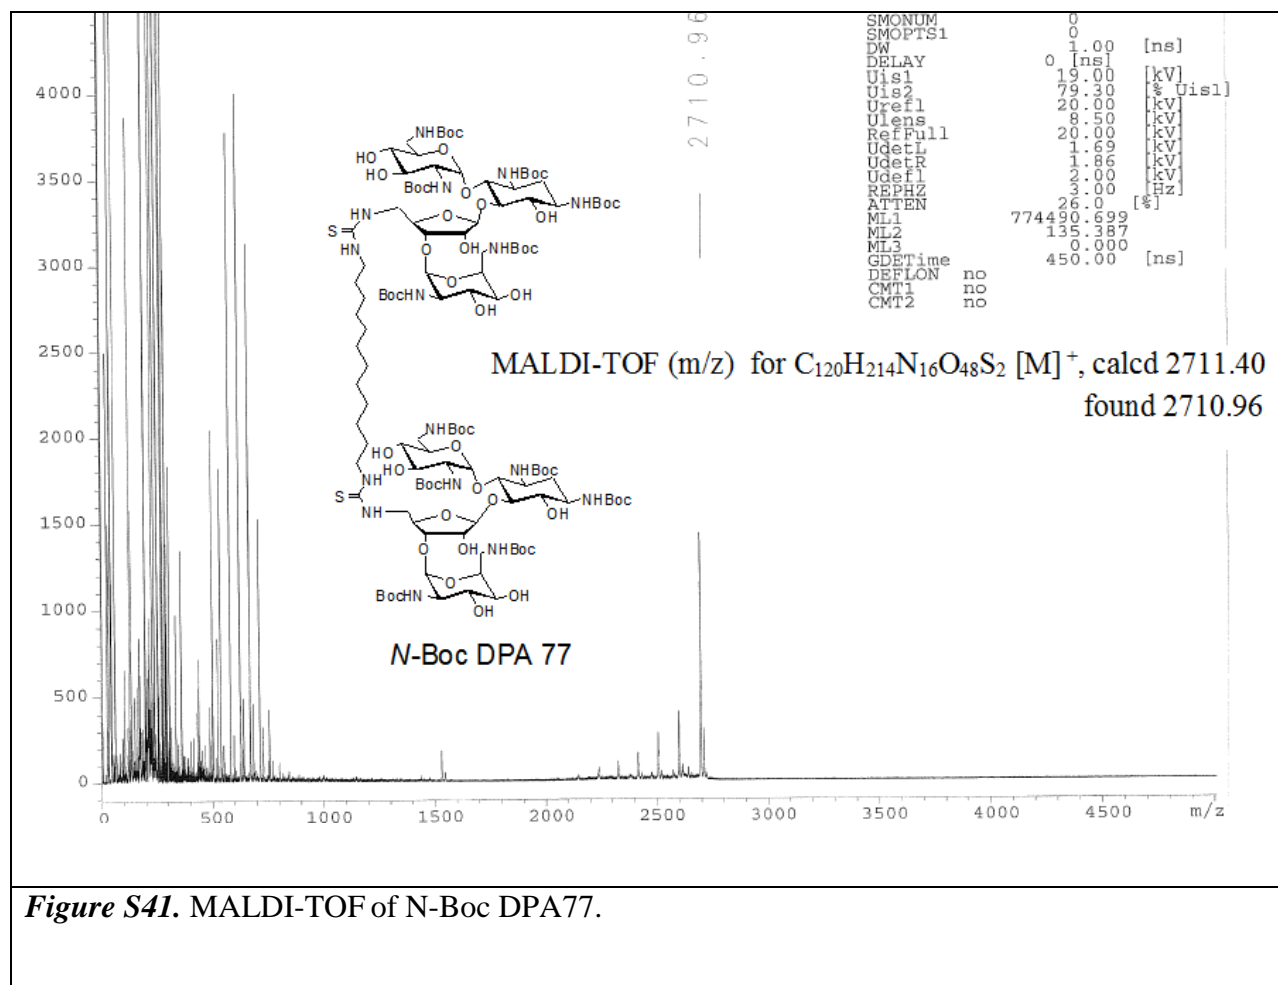

**Figure S41.** MALDI-TOF of N-Boc DPA77.

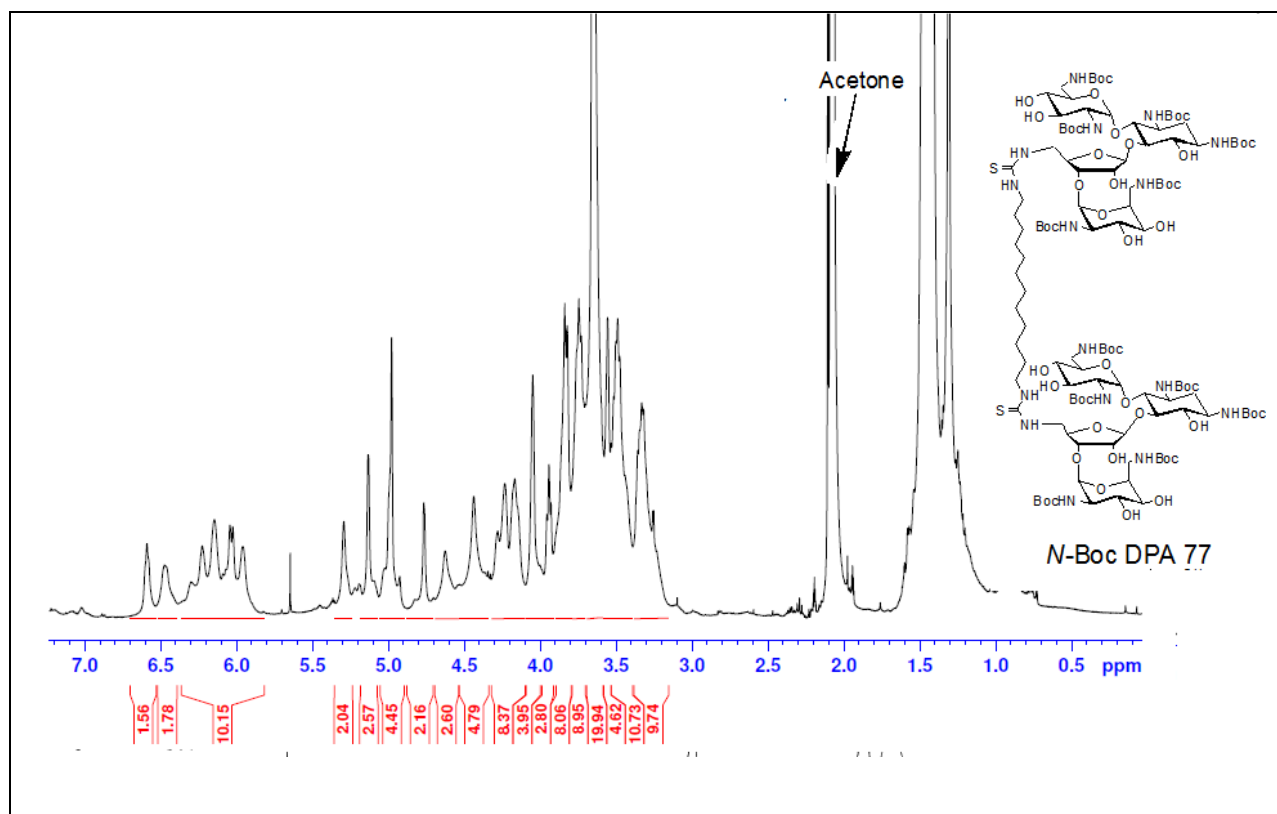

**Figure S42.**  $^1\text{H-NMR}$  of N-Boc DPA77 in  $\text{CD}_3\text{COCD}_3$ .

DPA77.

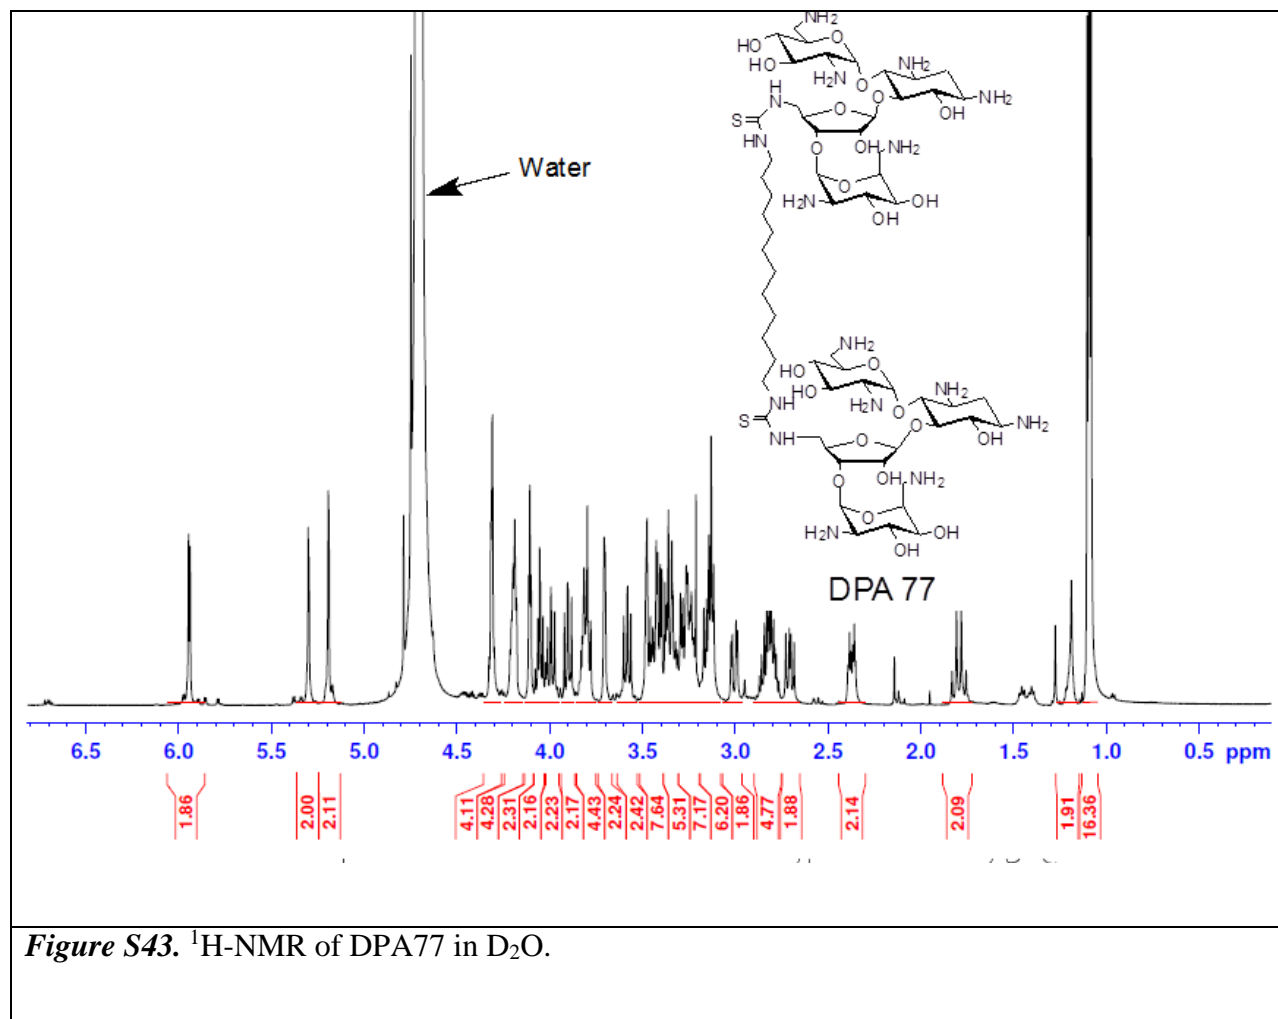

Figure S43. <sup>1</sup>H-NMR of DPA77 in D<sub>2</sub>O.

DPA77.

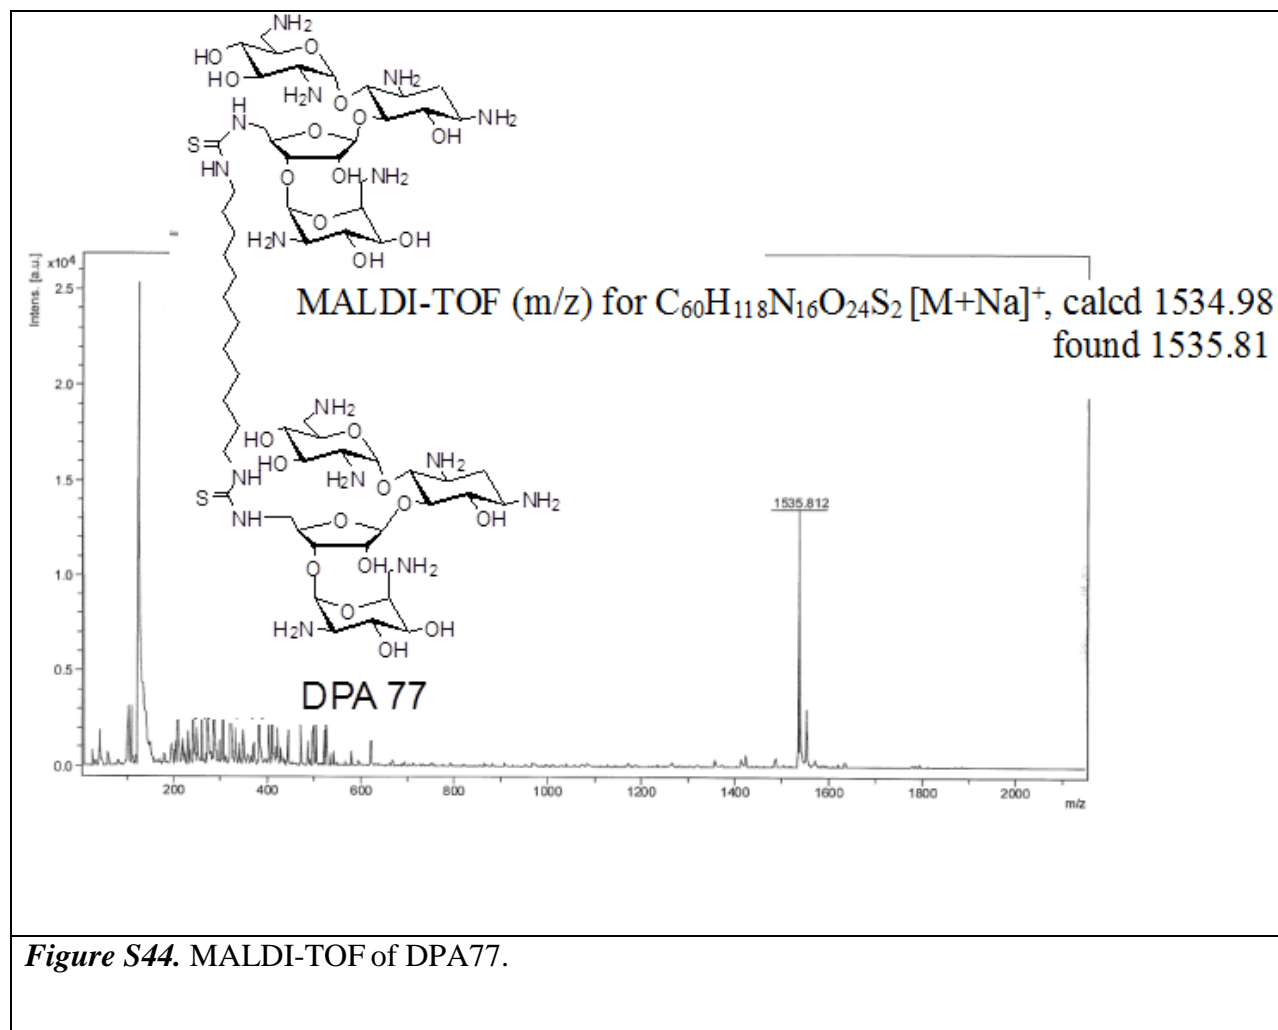

**Figure S44.** MALDI-TOF of DPA77.

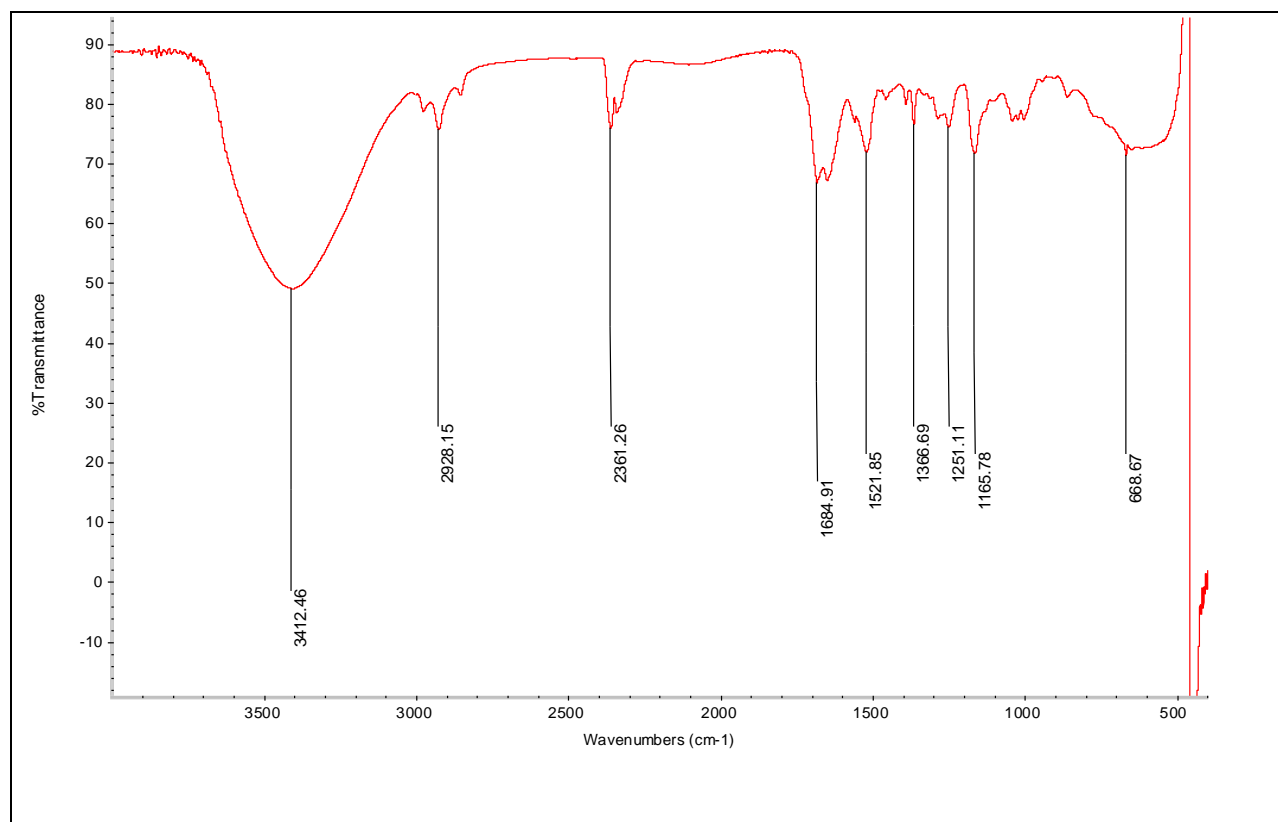

**Figure S45.** IR of DPA77.



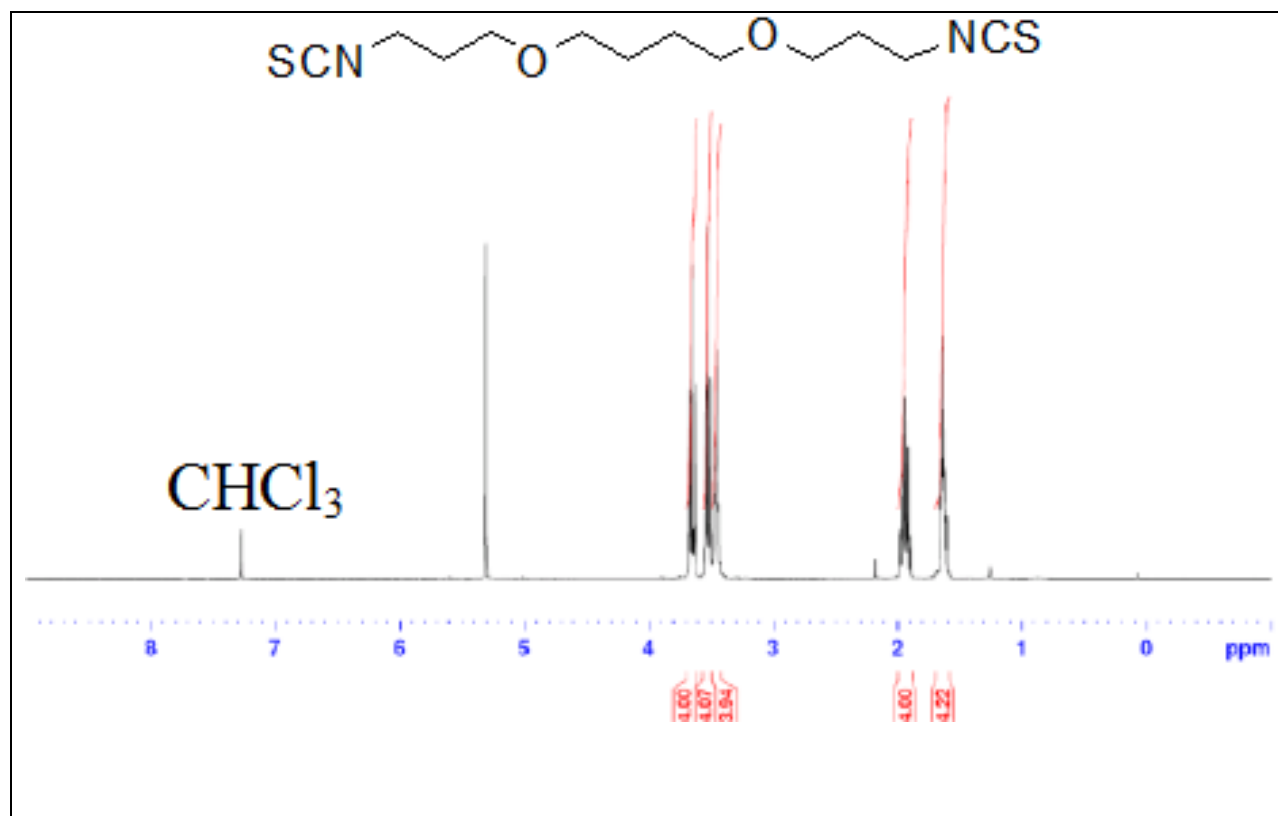

**Figure S46.** <sup>1</sup>H-NMR of linker for N-Boc DPA78 in CDCl<sub>3</sub>.

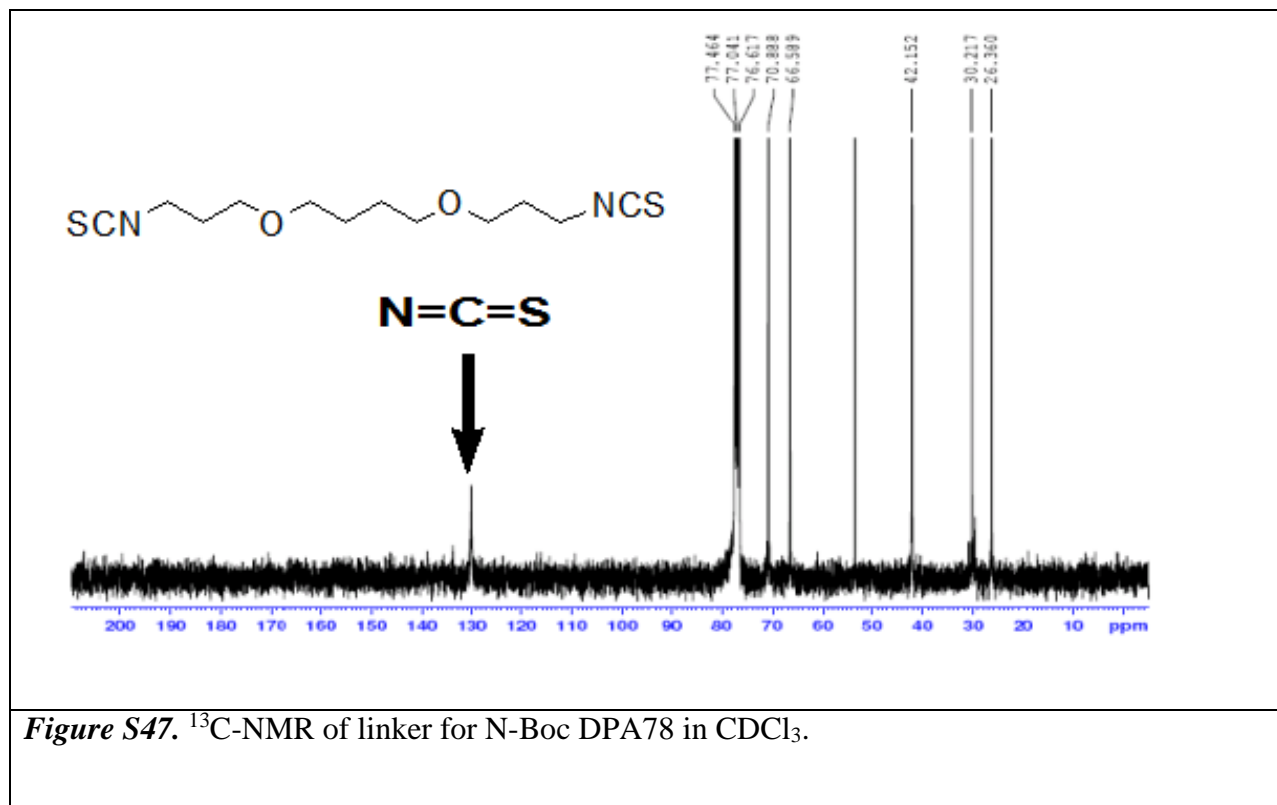

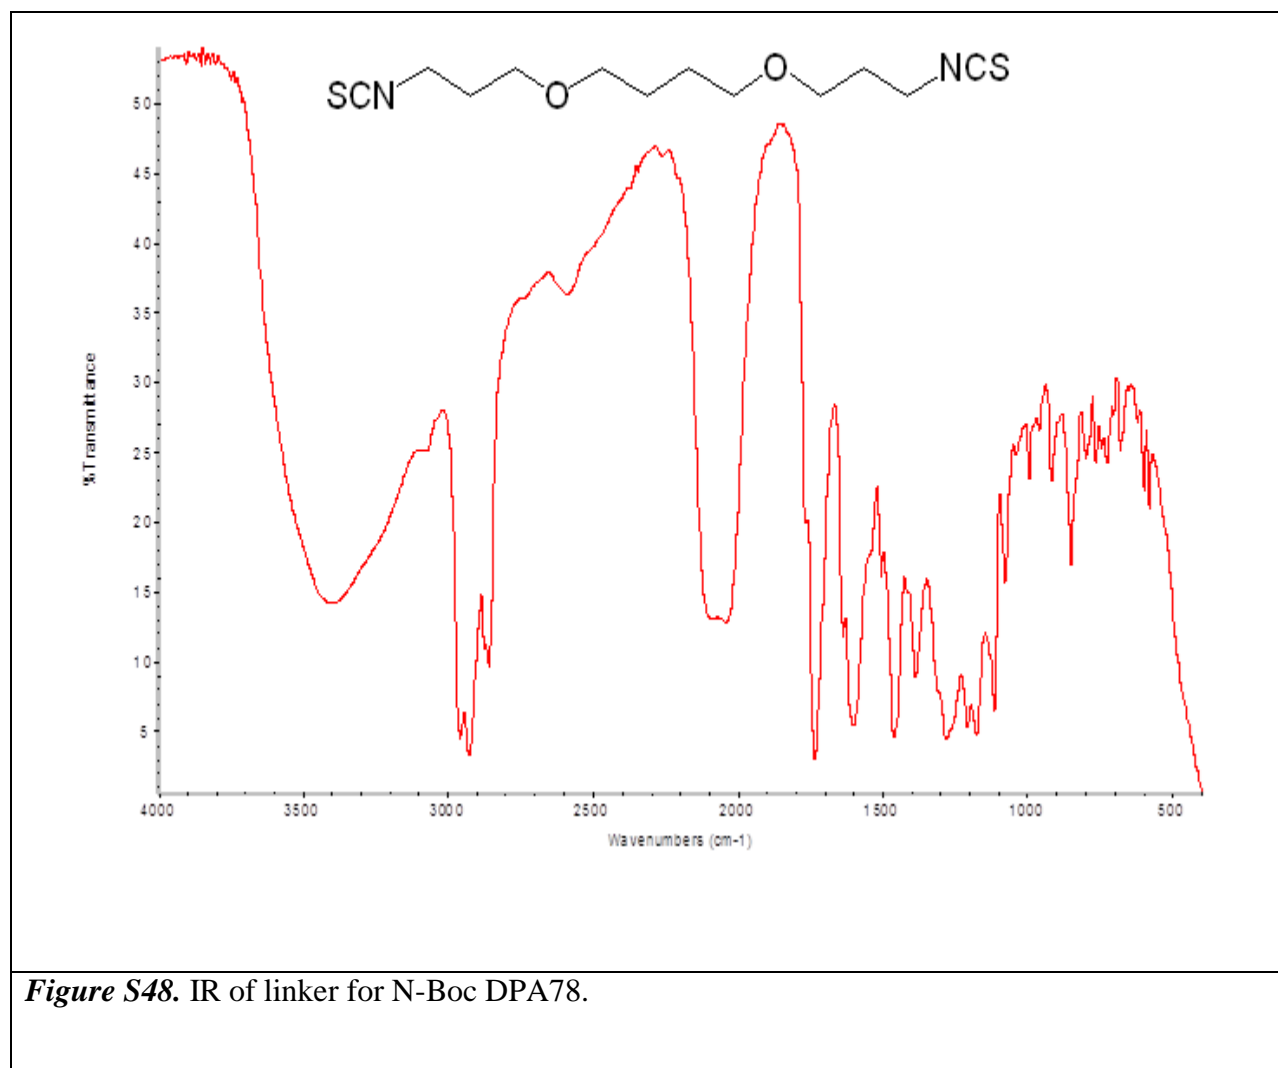

**Figure S48.** IR of linker for N-Boc DPA78.

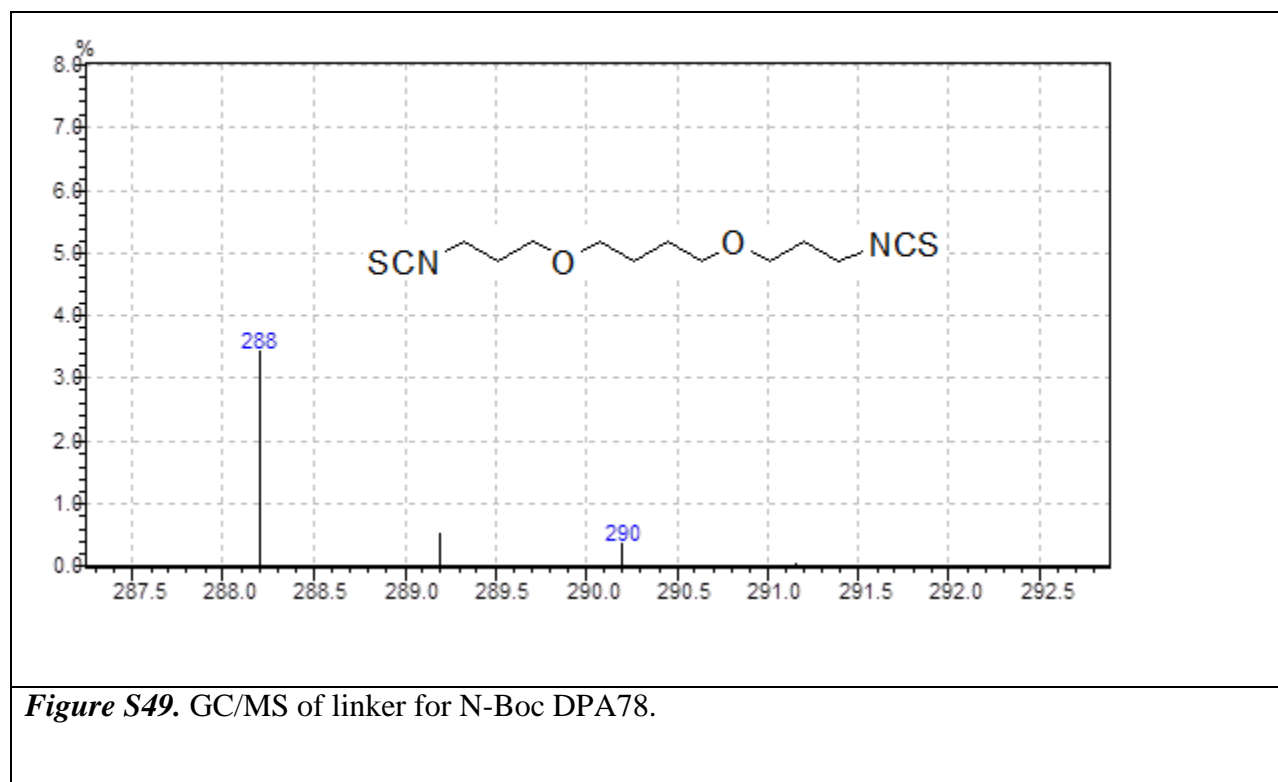

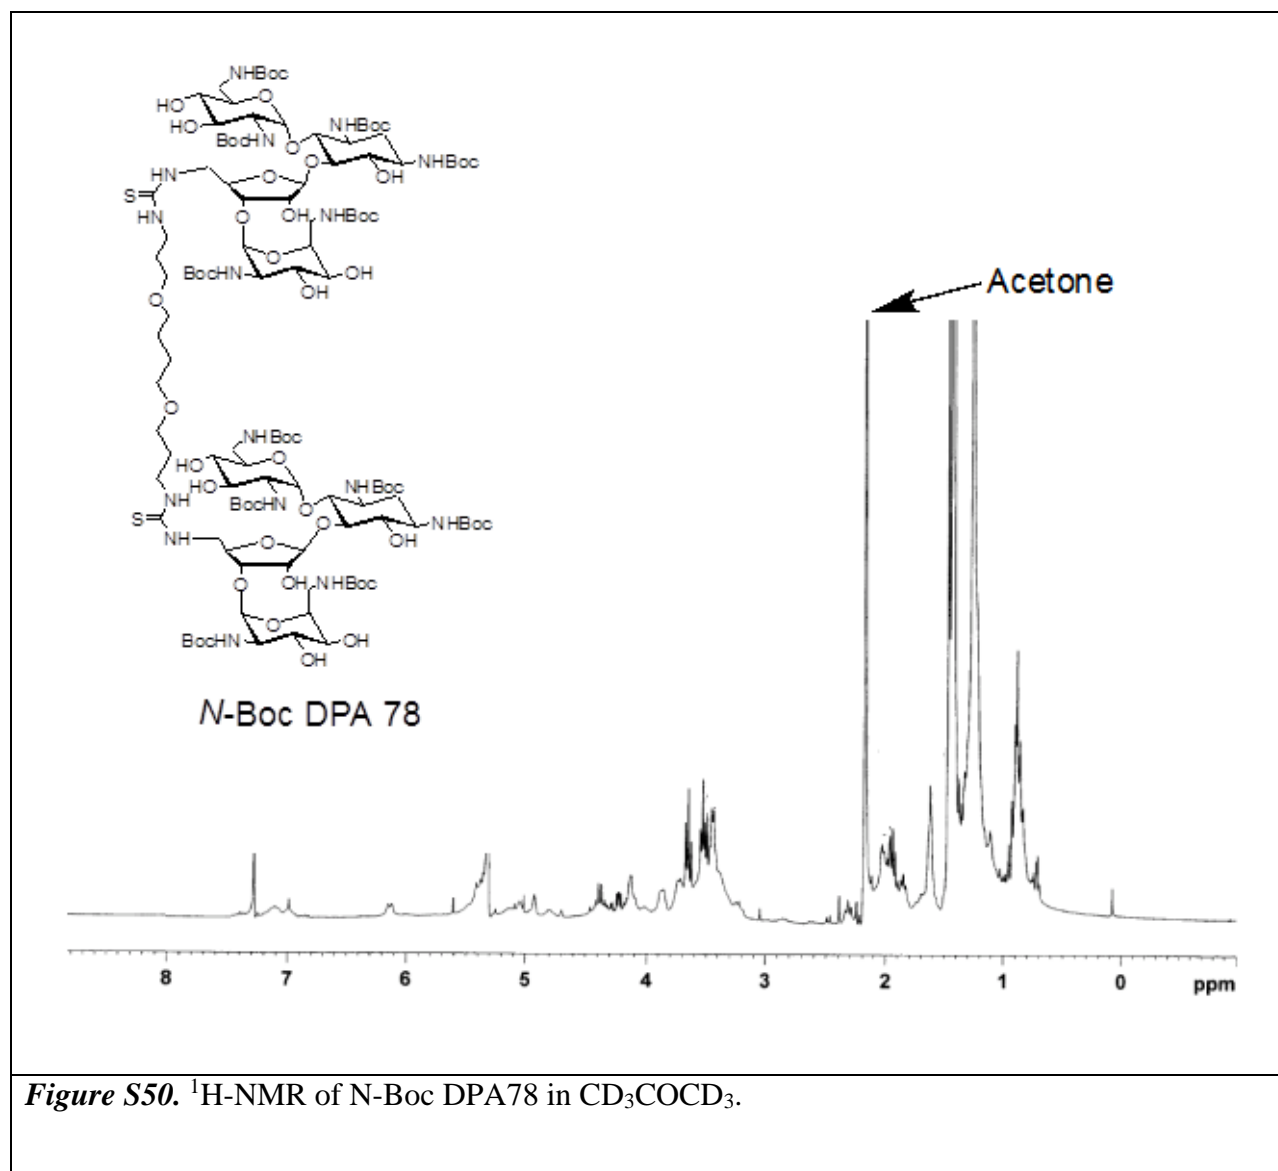

**Figure S50.** <sup>1</sup>H-NMR of N-Boc DPA78 in CD<sub>3</sub>COCD<sub>3</sub>.

DPA78.

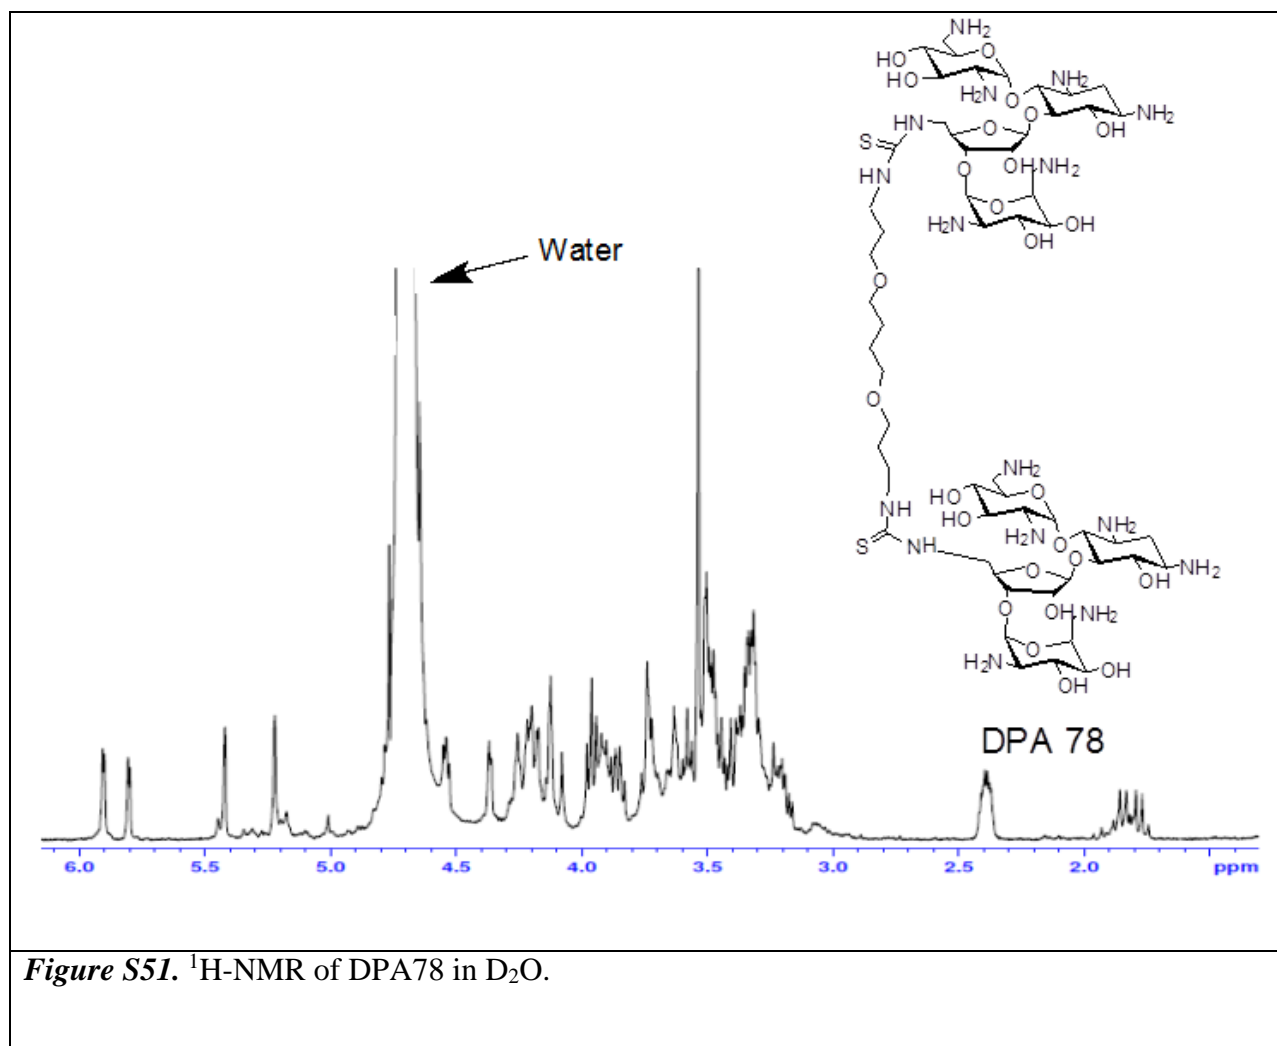

**Figure S51.**  $^1\text{H-NMR}$  of DPA78 in  $\text{D}_2\text{O}$ .



N-Boc DPA 80.

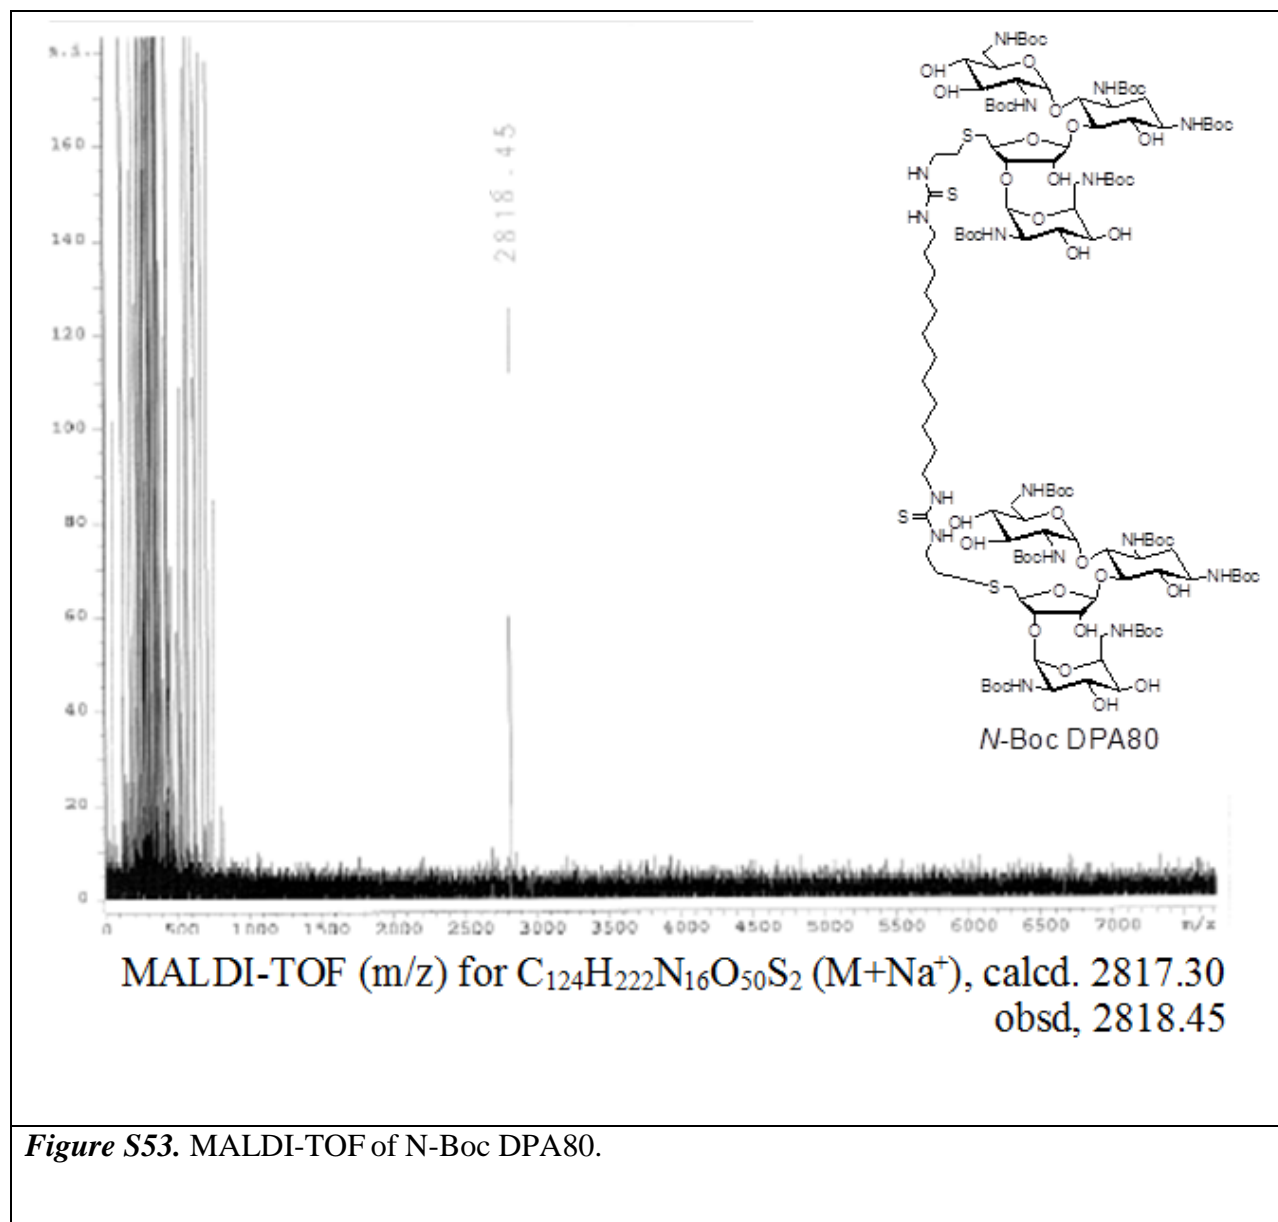

**Figure S53.** MALDI-TOF of N-Boc DPA80.



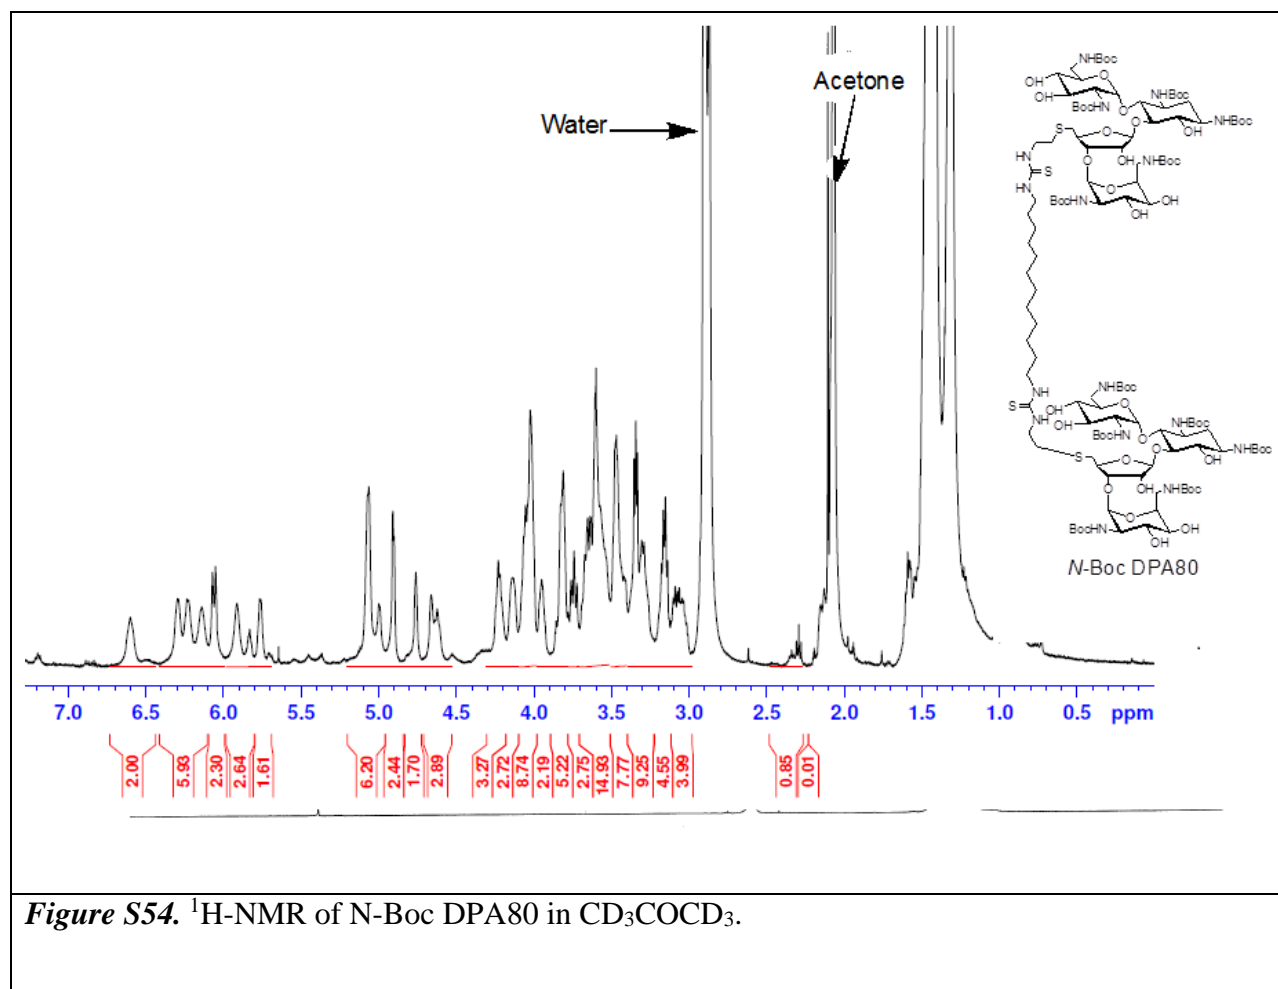

**Figure S54.** <sup>1</sup>H-NMR of N-Boc DPA80 in CD<sub>3</sub>COCD<sub>3</sub>.

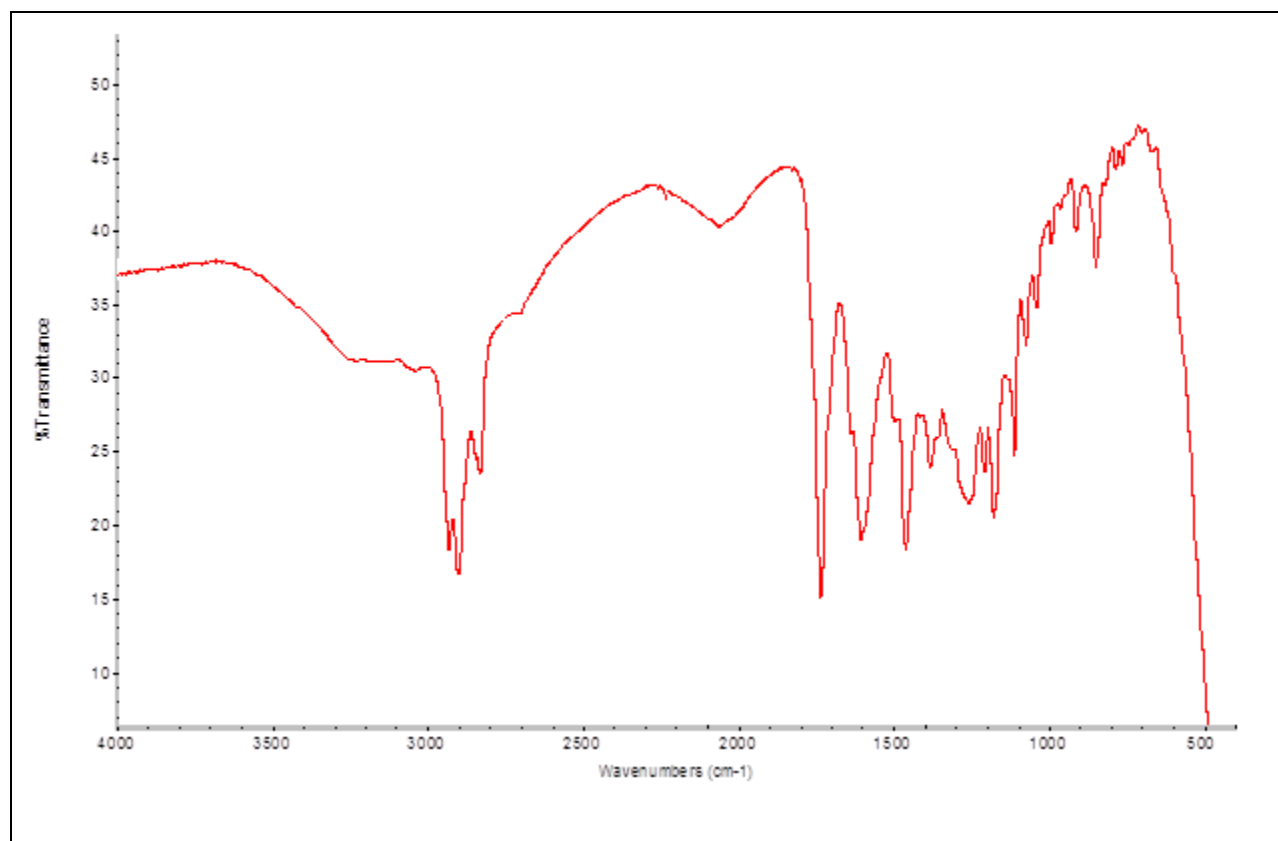

**Figure S55.** IR of N-Boc DPA80.

DPA80.

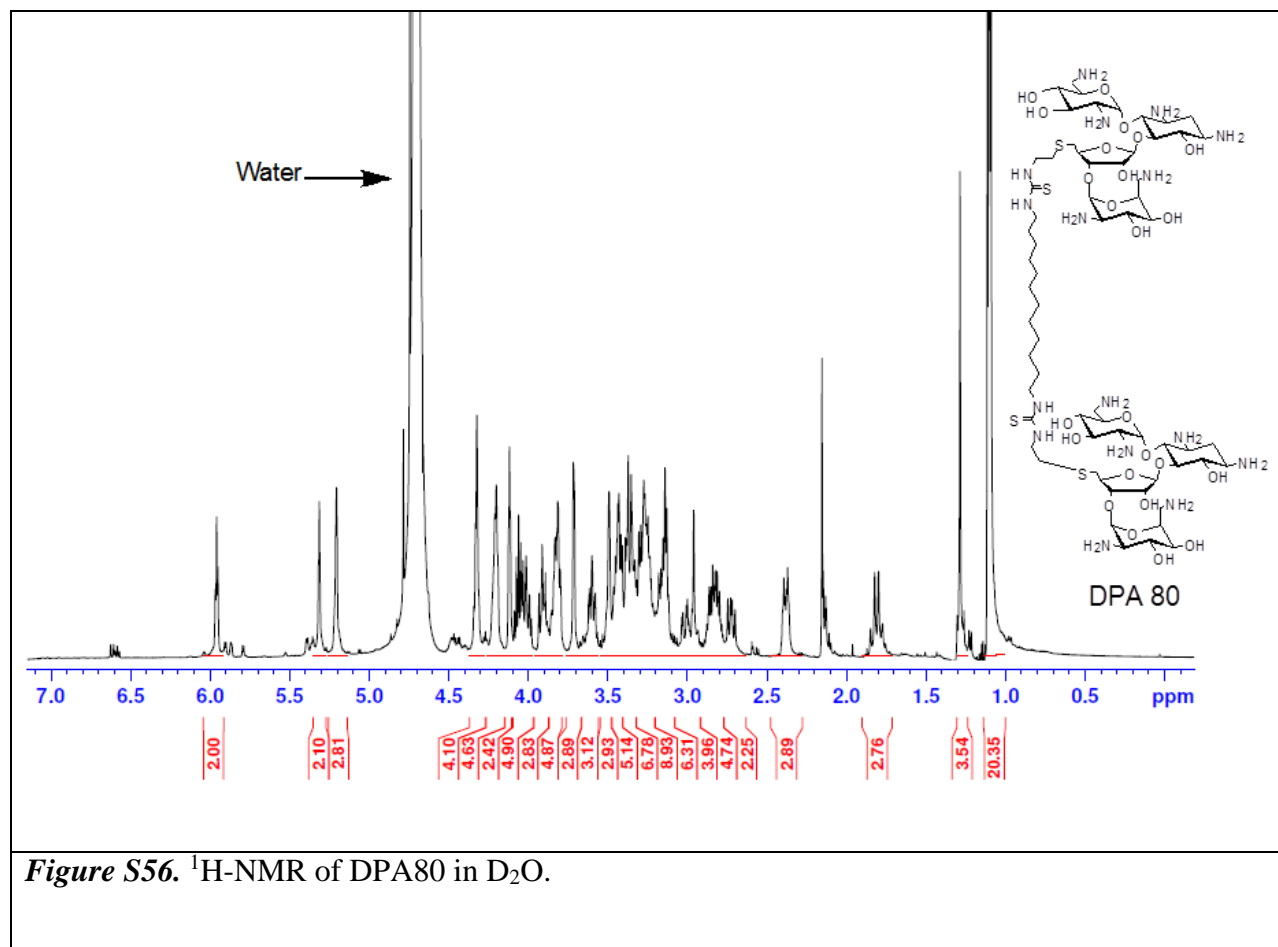

**Figure S56.** <sup>1</sup>H-NMR of DPA80 in D<sub>2</sub>O.

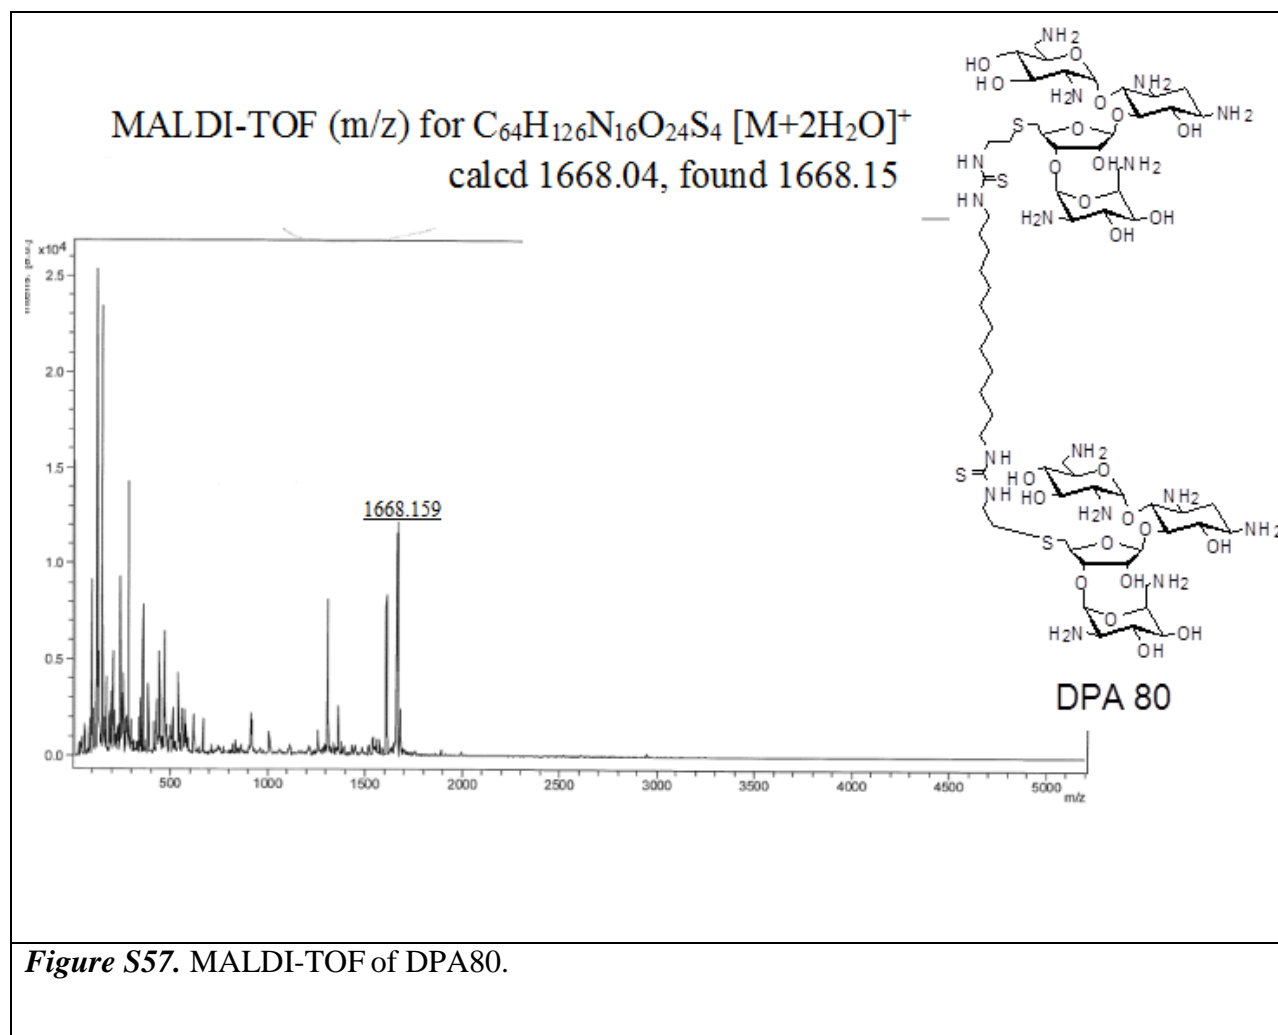

**Figure S57.** MALDI-TOF of DPA80.

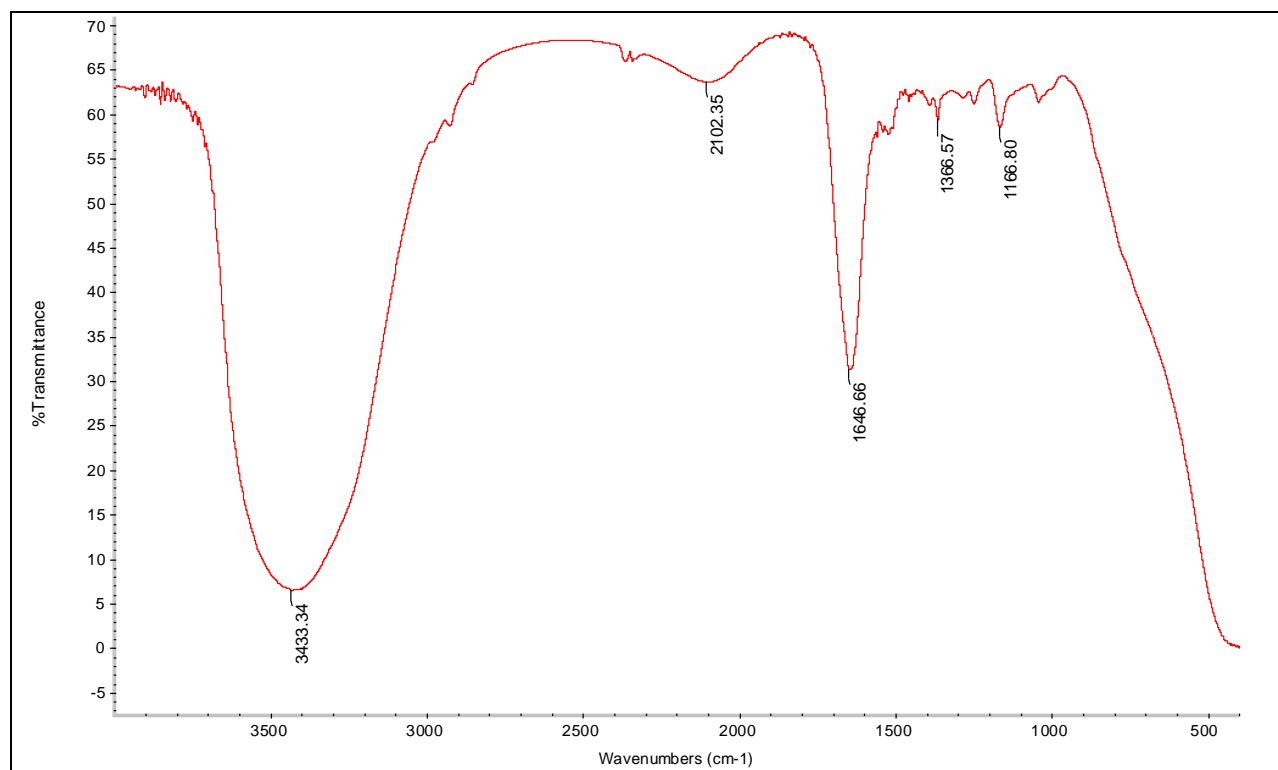

**Figure S58.** IR of DPA80.

DPA311.

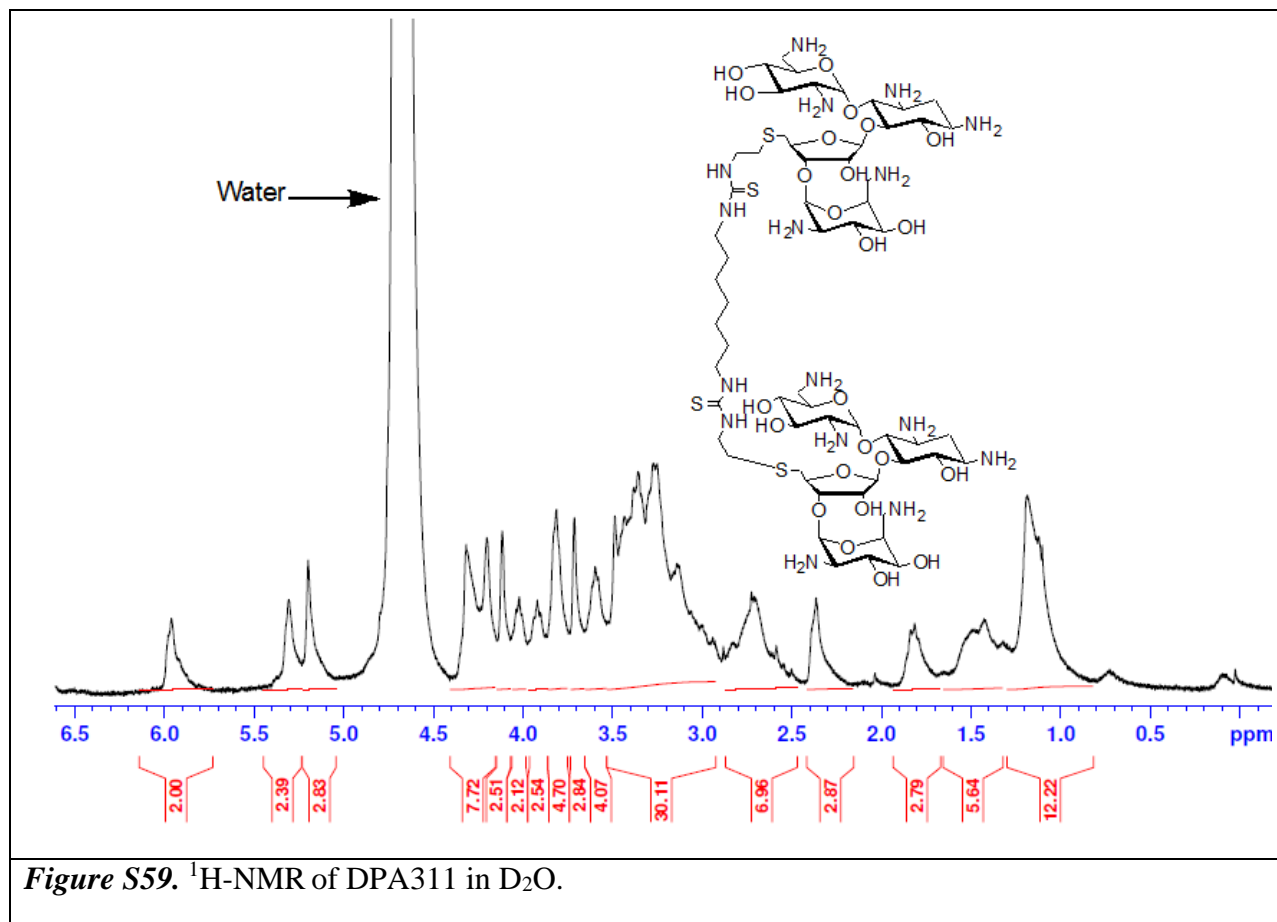

Figure S59. <sup>1</sup>H-NMR of DPA311 in D<sub>2</sub>O.

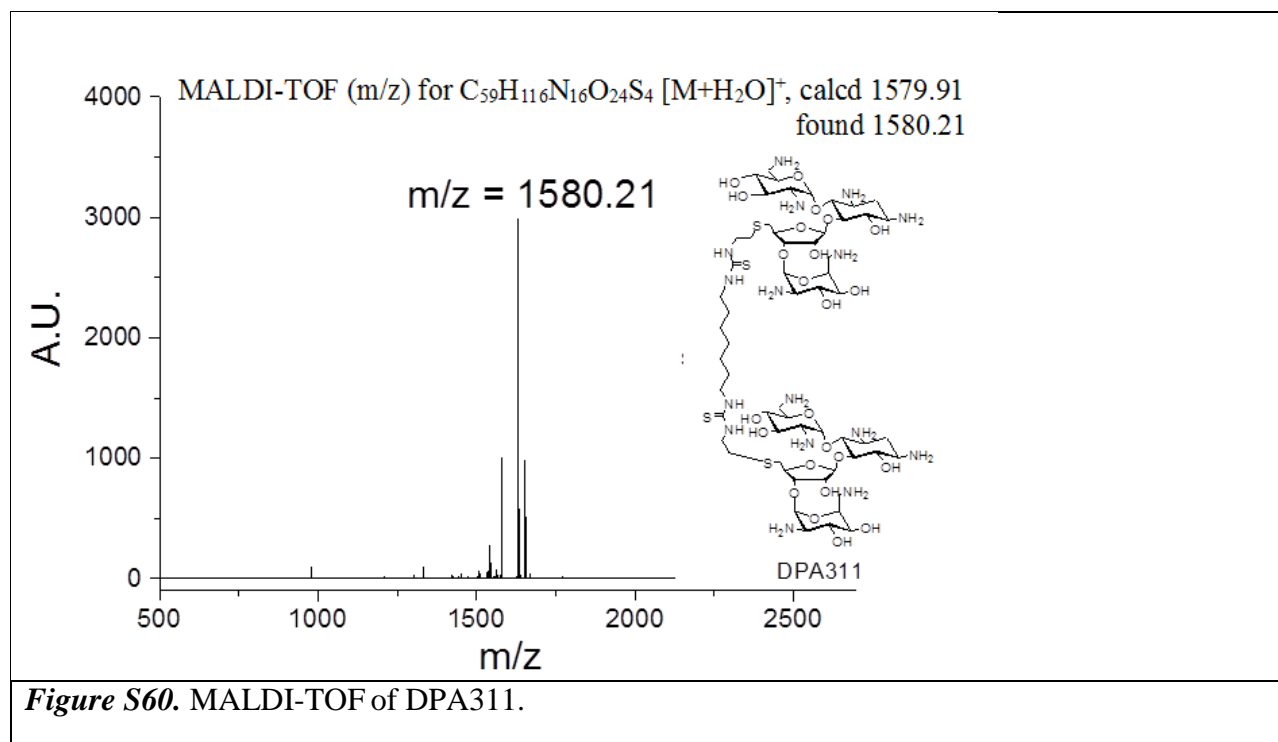

**Figure S60.** MALDI-TOF of DPA311.

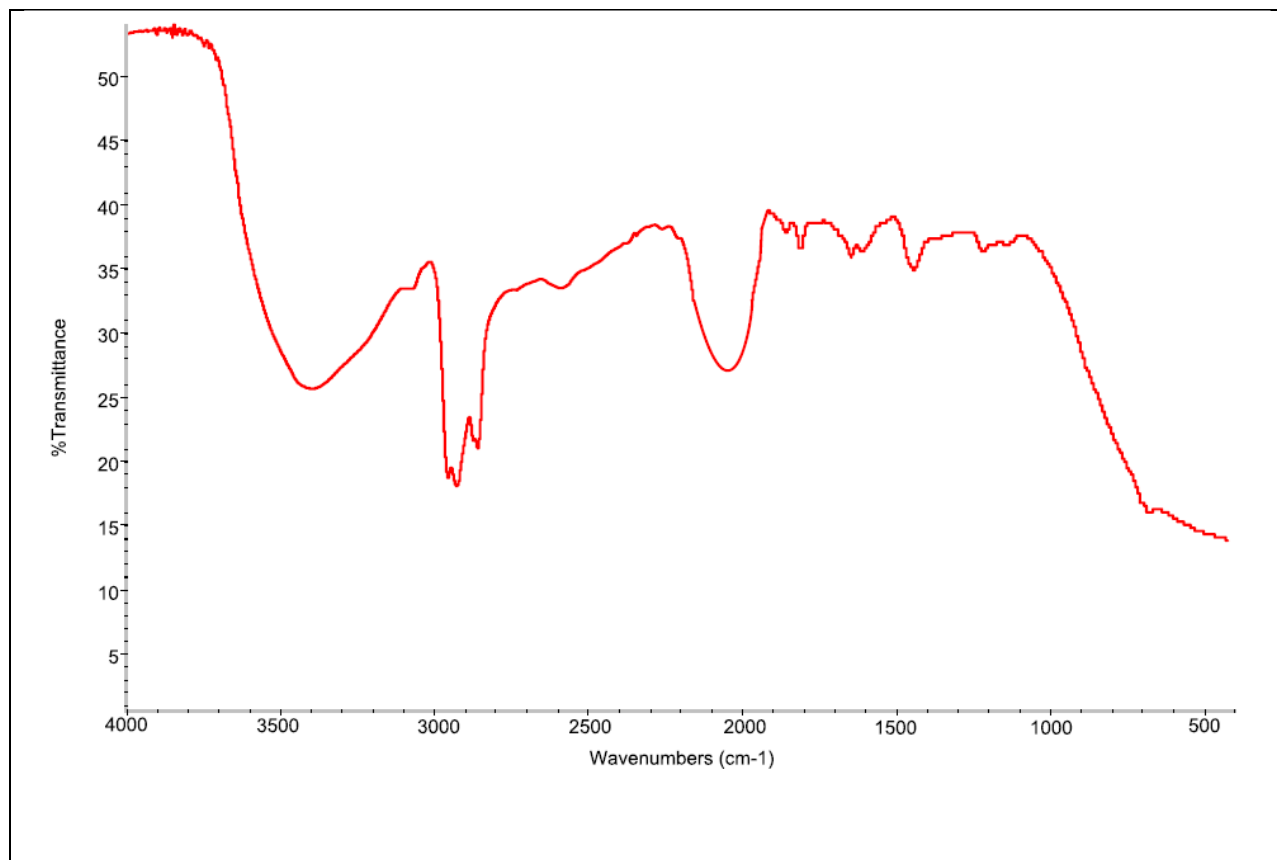

*Figure S61.* IR of DPA311.



DPA312.

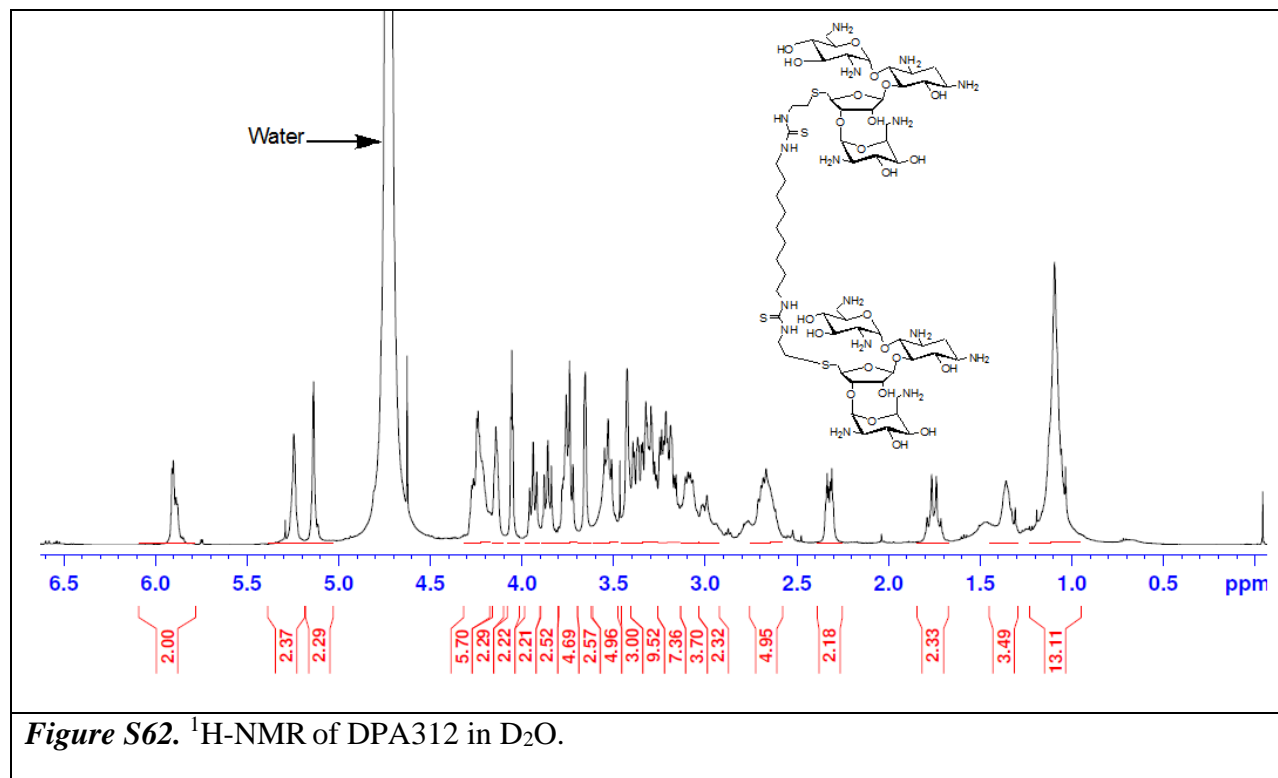

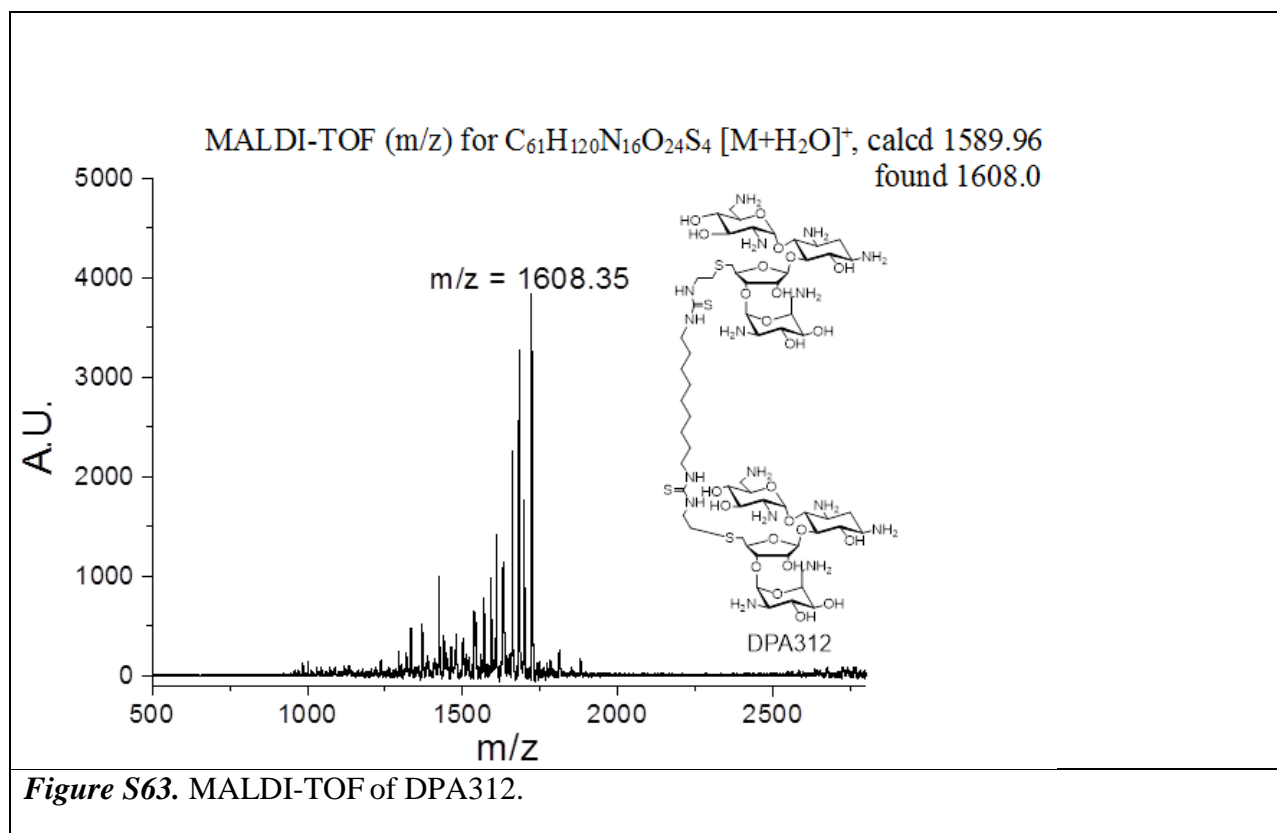

*Figure S63.* MALDI-TOF of DPA312.

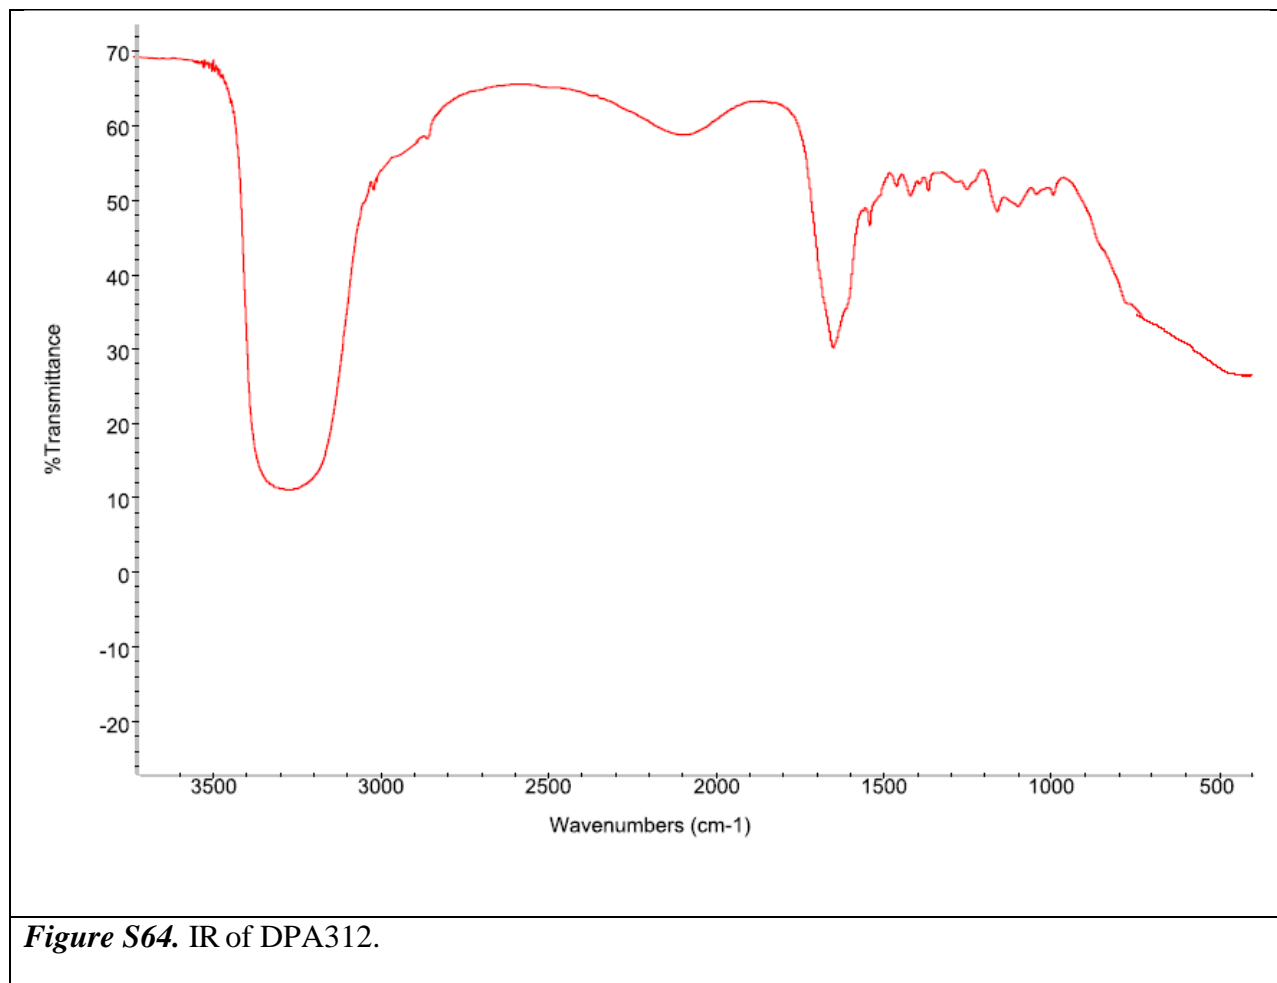

DPA313.

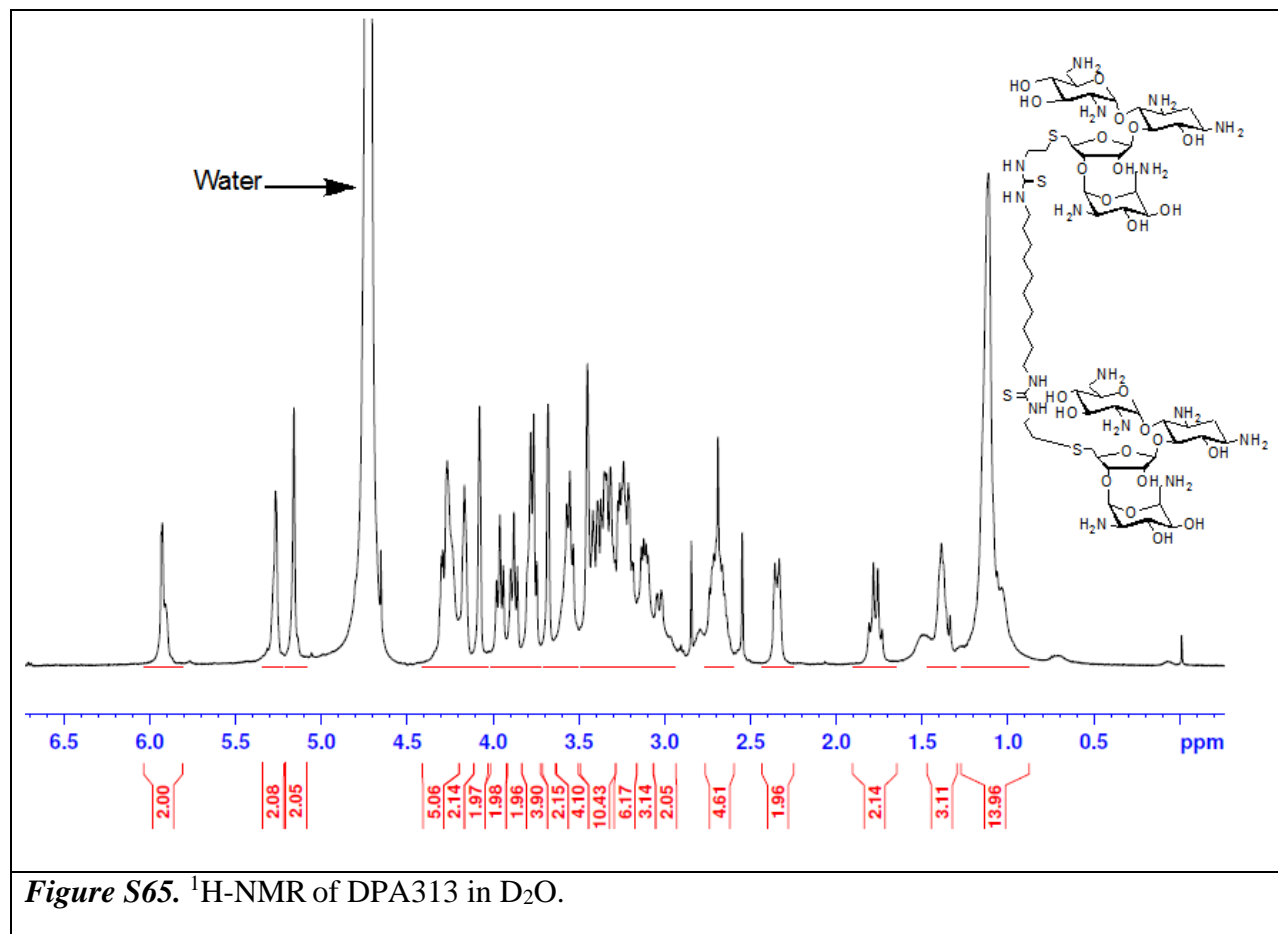

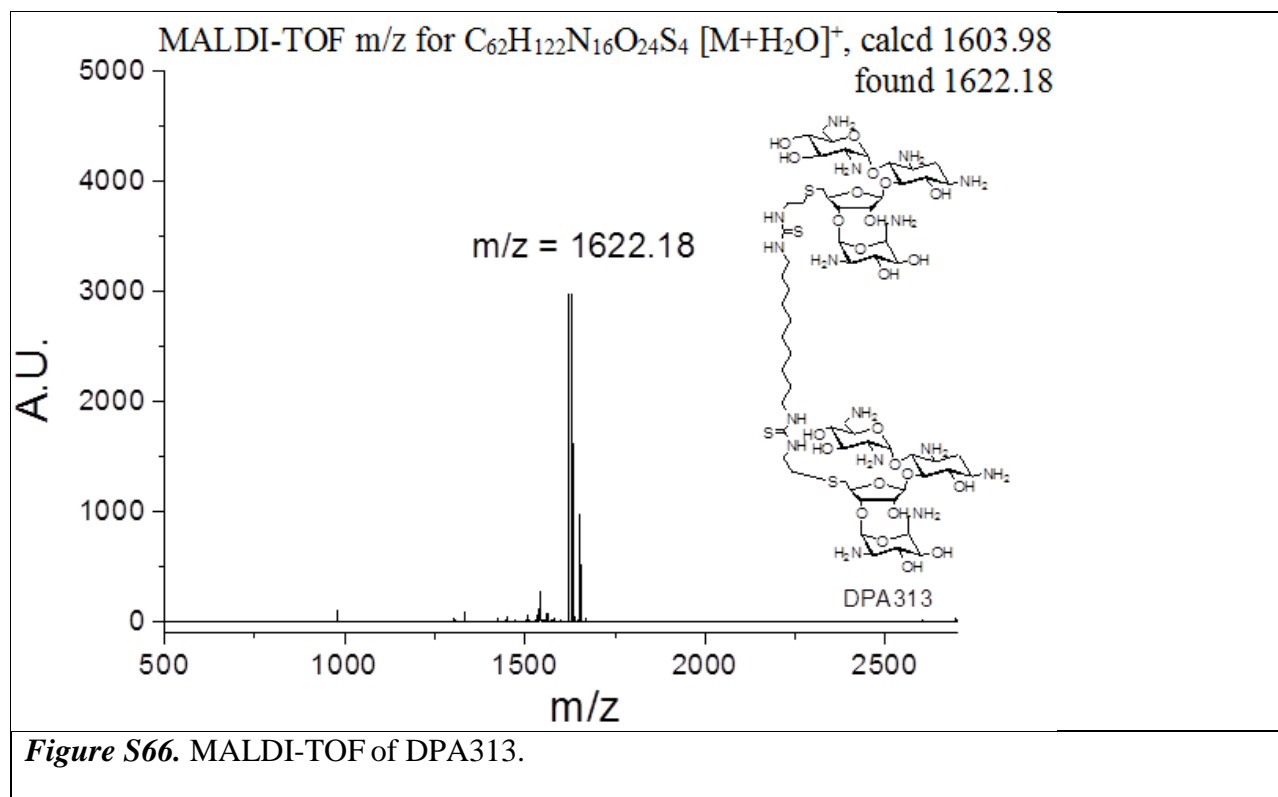

**Figure S66.** MALDI-TOF of DPA313.

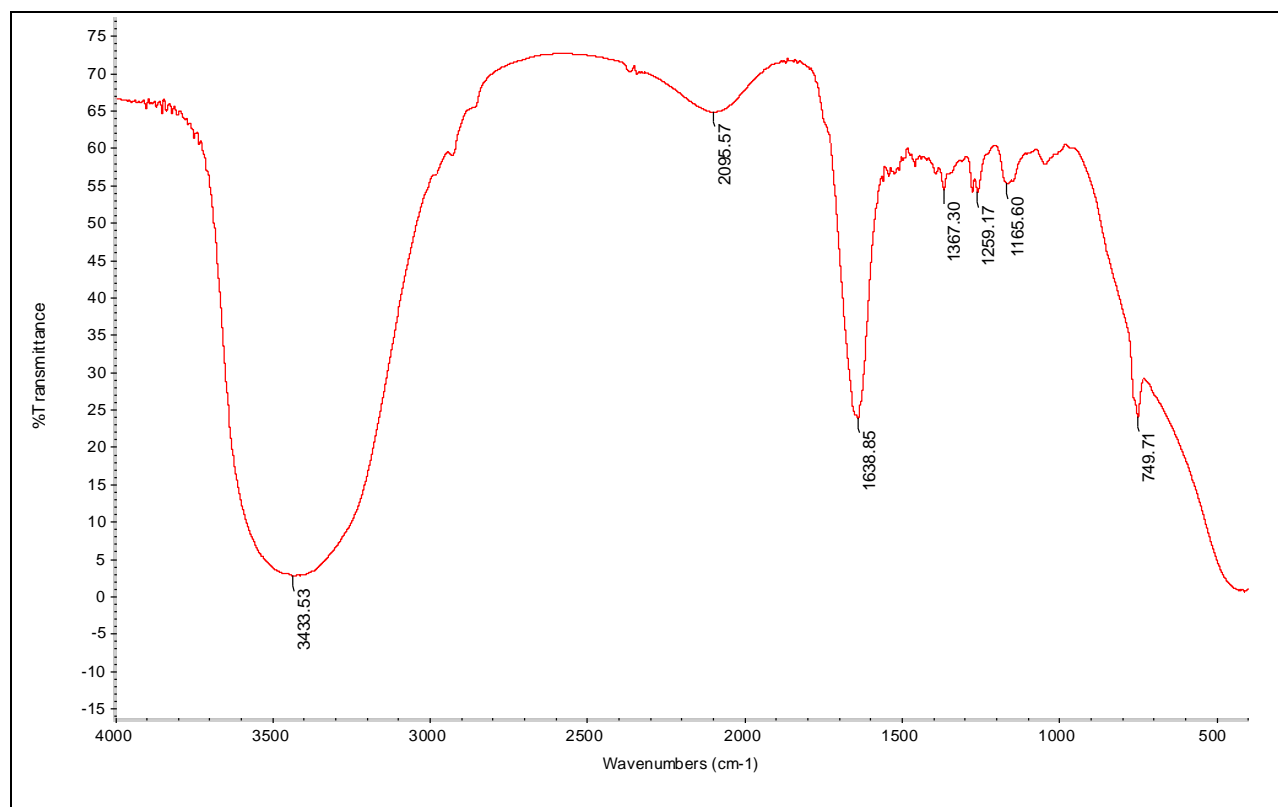

**Figure S67.** IR of DPA313.

# ITC profile of neomycin and neomycin dimers with AT DNA

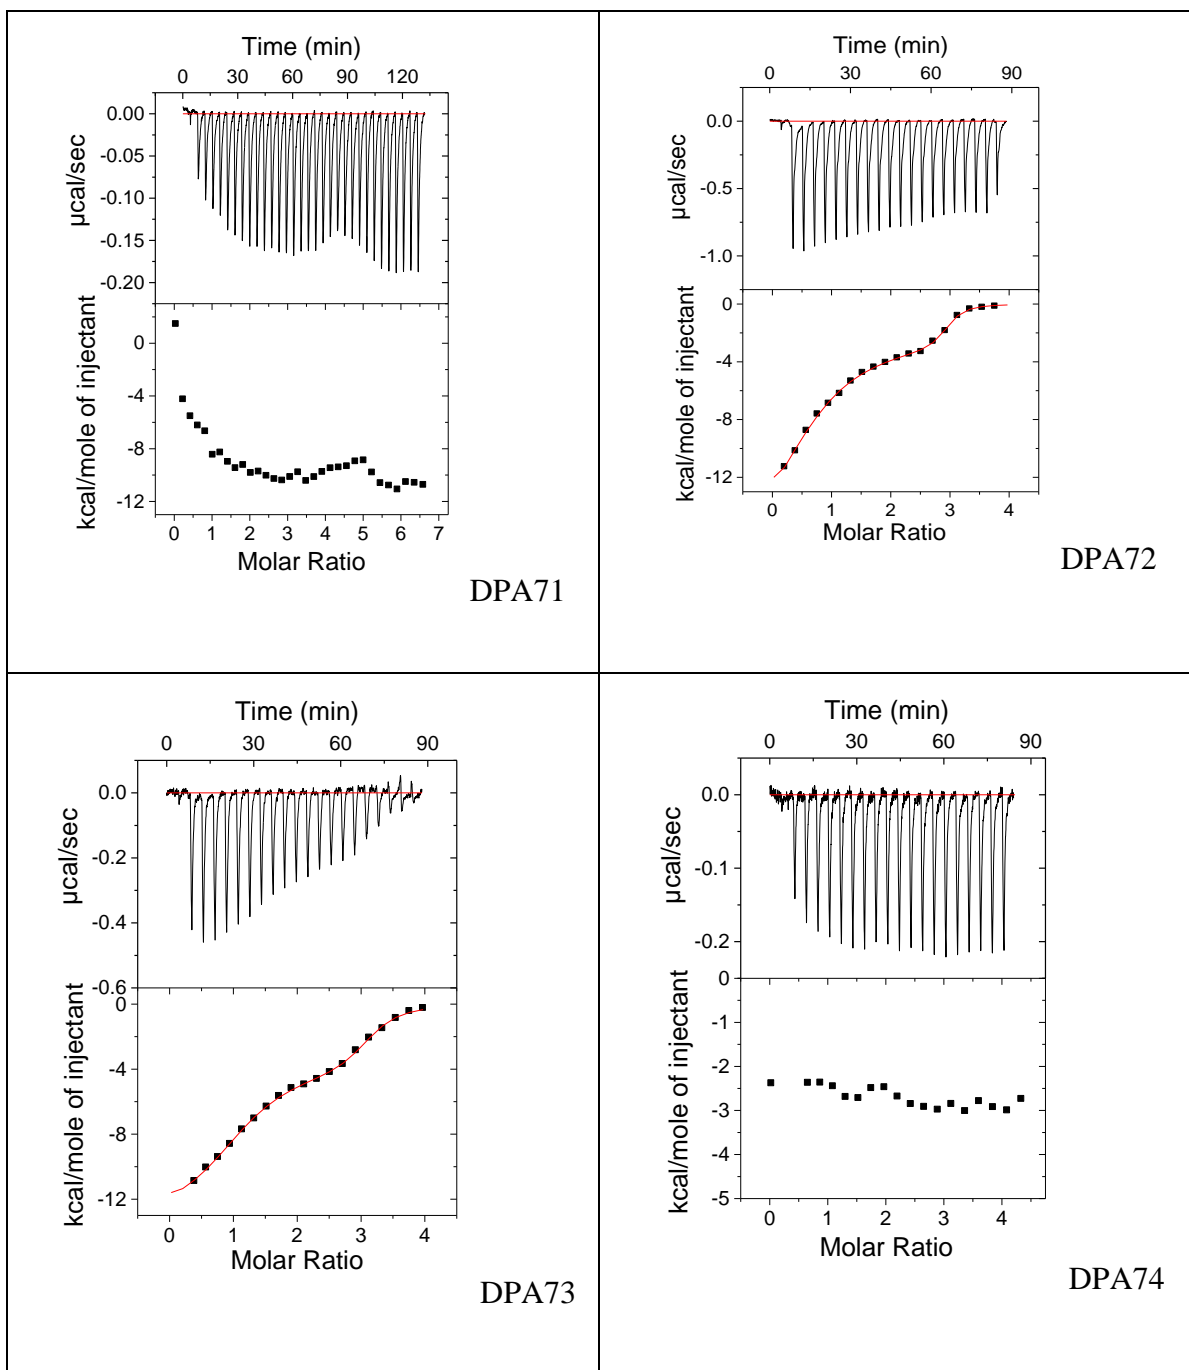

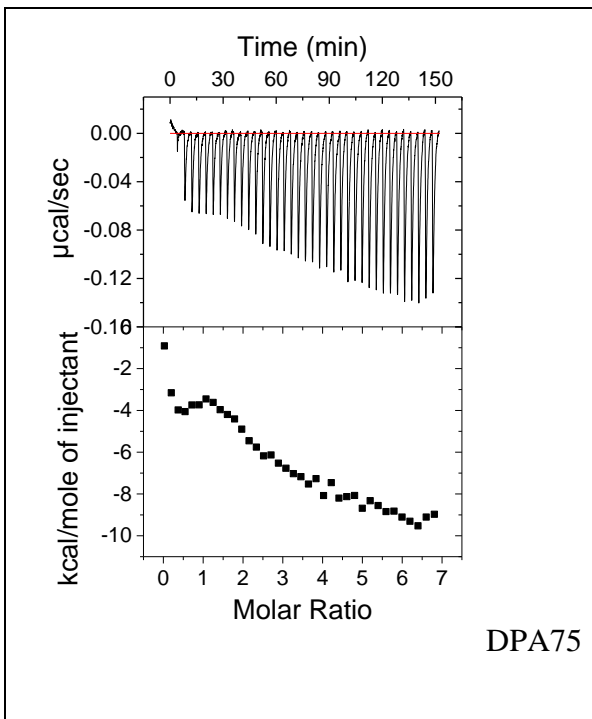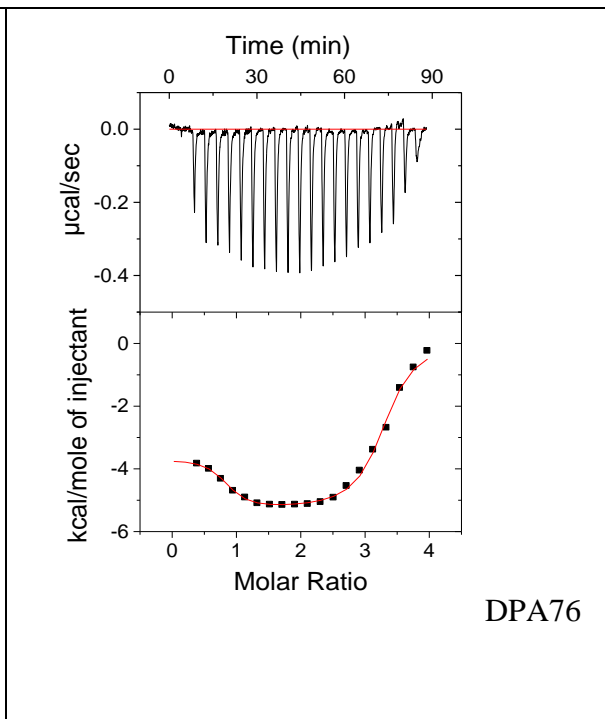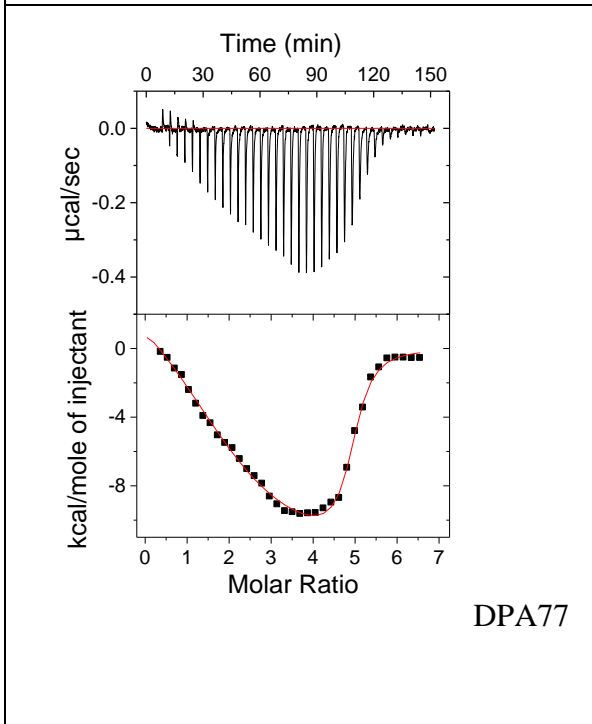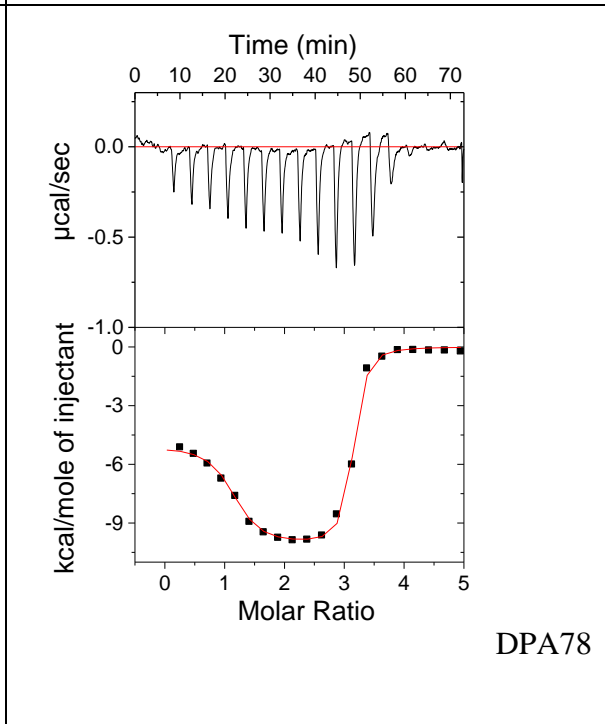



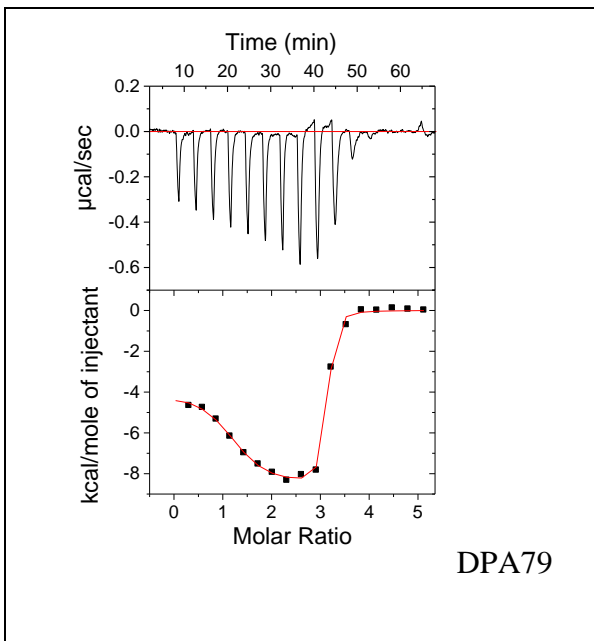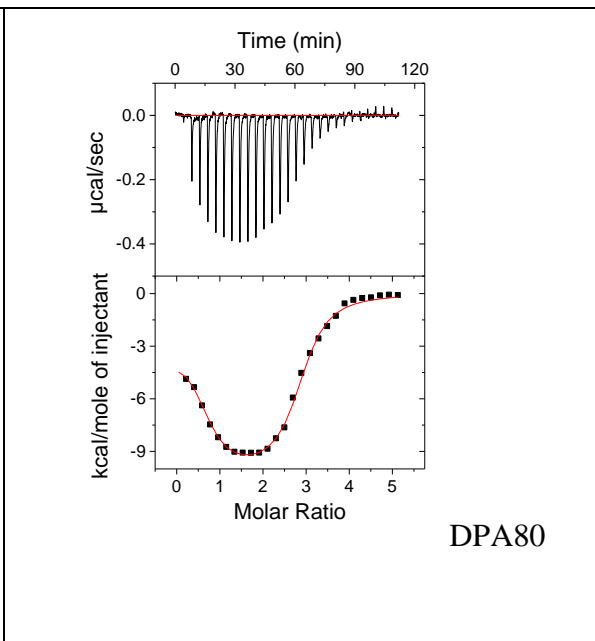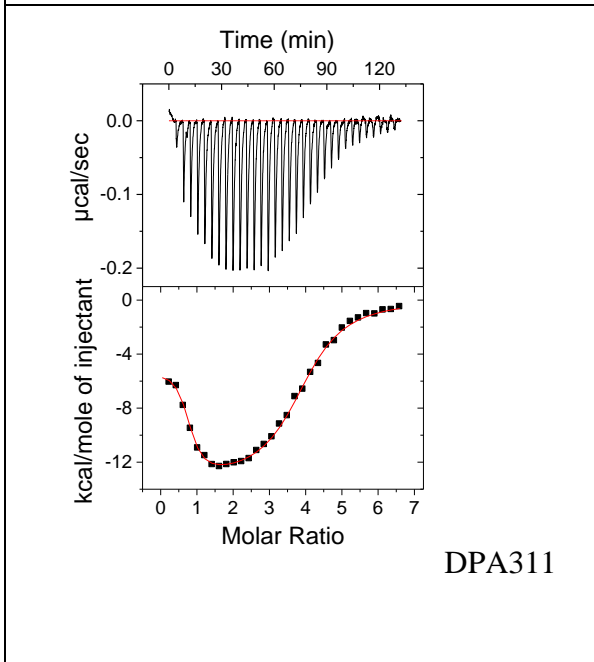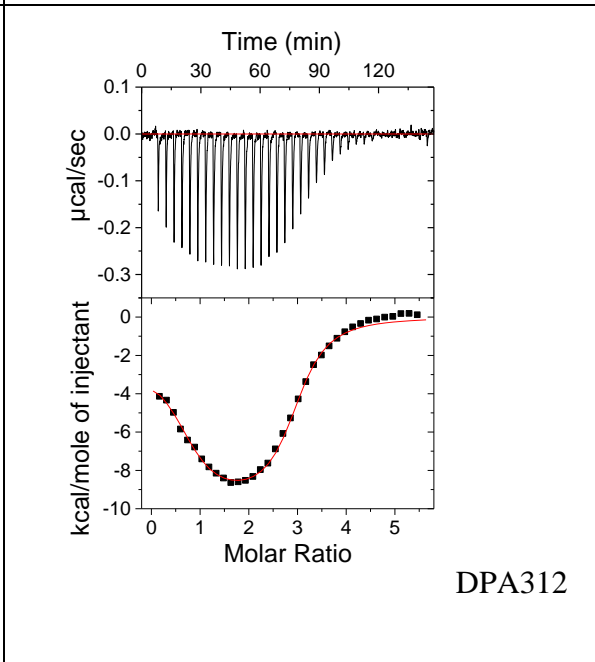

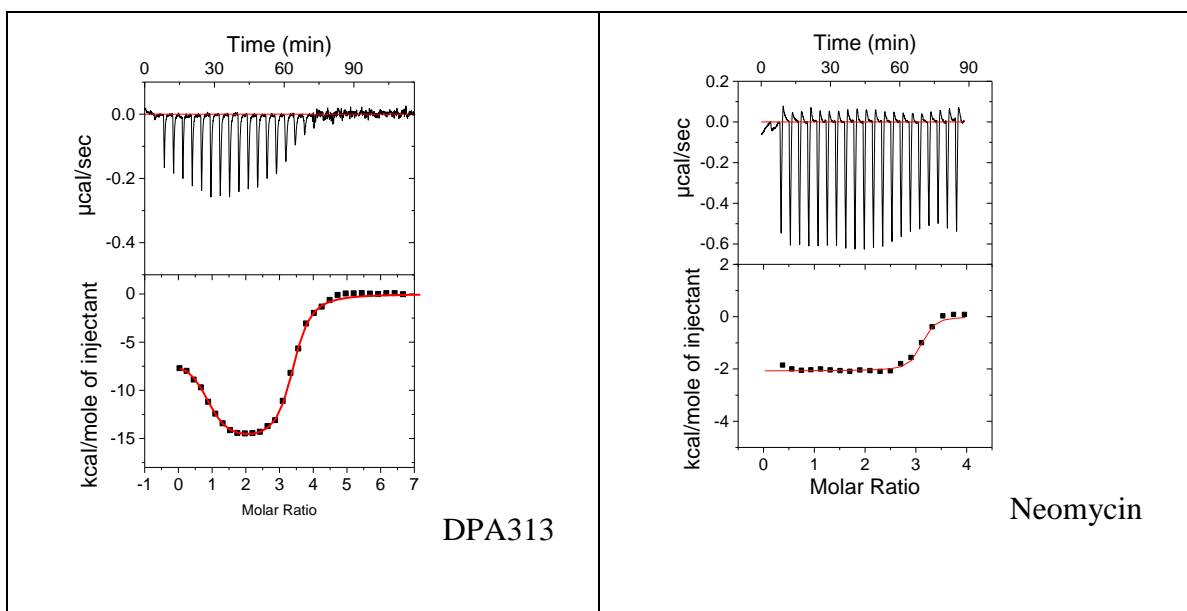

**Figure S68.** ITC profile of indicated ligands including neomycin and neomycin dimers with d[5'-G<sub>2</sub>A<sub>6</sub>T<sub>6</sub>C<sub>2</sub>-3']. The upper panel in each ITC titration represents the heat burst curves, each of which is the result of a 9  $\mu\text{L}$  injection of 125  $\mu\text{M}$  of **neomycin dimer**, with a DNA concentration of 4  $\mu\text{M}$ /duplex. The area under each heat burst curve was calculated by integration and yielded the associated injection heats that are plotted as a function of molar ratio of drug-to-DNA in the lower panel in each figure. Corrected injection heats plotted as a function of the [drug]/DNA ratio. Buffer conditions: 100 mM KCl, 10 mM SC, 0.5 mM EDTA, pH 5.5. T = 25 °C. [DNA] = 4  $\mu\text{M}$ /duplex. [**neomycin dimer**] = 125  $\mu\text{M}$ . [Neomycin] = 250  $\mu\text{M}$  and the [DNA] = 8  $\mu\text{M}$ /duplex.

| Compound name | Structure of the linker                                                             | $N_1$   | $K_1$ ( $M^{-1}$ )        | $\Delta H_1$ (kcal/mol) | $\Delta S_1$ (cal/mol.K) |
|---------------|-------------------------------------------------------------------------------------|---------|---------------------------|-------------------------|--------------------------|
| DPA71         |    | ND      | ND                        | -3.9±0.2                | ND                       |
| DPA72         |    | 1.0±0.0 | (2.5±0.3)X10 <sup>7</sup> | -13.5±0.7               | -10.5                    |
| DPA73         |    | 0.8±0.1 | (7.6±1.8)X10 <sup>7</sup> | -19.6±3.0               | -29.6                    |
| DPA74         |   | ND      | ND                        | -2.4±0.3                | ND                       |
| DPA75         |  | ND      | ND                        | -4.2±0.4                | ND                       |
| DPA76         |  | 0.8±0.1 | (7.2±0.5)X10 <sup>7</sup> | -3.6±0.3                | 26.4                     |
| DPA77         |  | 1.0±0.1 | (6.1±0.4)X10 <sup>7</sup> | -6.1±0.5                | 15.0                     |
| DPA78         |  | 1.1±0.1 | (9.1±1.0)X10 <sup>7</sup> | -5.1±0.3                | 16.8                     |
| DPA79*        |  | 1.1±0.0 | (1.6±0.2)X10 <sup>8</sup> | -5.2±0.1                | 19.9                     |
| DPA80*        |  | 0.8±0.1 | (1.2±0.2)X10 <sup>8</sup> | -4.4±0.3                | 22.4                     |

|          |                                                                                   |         |                           |          |      |
|----------|-----------------------------------------------------------------------------------|---------|---------------------------|----------|------|
| DPA311*  | 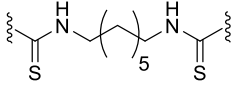 | 0.7±0.0 | (1.3±0.1)X10 <sup>8</sup> | -5.2±0.3 | 19.8 |
| DPA312*  |  | 0.7±0.0 | (1.6±0.2)X10 <sup>8</sup> | -3.7±0.2 | 21.3 |
| DPA313*  |  | 0.8±0.0 | (1.3±0.2)X10 <sup>8</sup> | -6.7±0.4 | 12.2 |
| Neomycin | NA                                                                                | 3.1±0.0 | (3.1±0.3)X10 <sup>5</sup> | -2.0±0.2 | 4.6  |

**Table S3.** ITC-derived thermodynamic characterization of neomycin dimers and neomycin with DNA duplex d[5'-G<sub>2</sub>A<sub>6</sub>T<sub>6</sub>C<sub>2</sub>-3'] at 25 °C. d[5'-G<sub>2</sub>A<sub>6</sub>T<sub>6</sub>C<sub>2</sub>-3'] = 8 μM/duplex [neomycin dimer] = 125 μM. Buffer condition: 100 mM KCl, 10 mM SC, 0.5 mM EDTA, pH 5.5.

## AC<sub>50</sub> values of neomycin dimers and neomycin against AT rich DNA

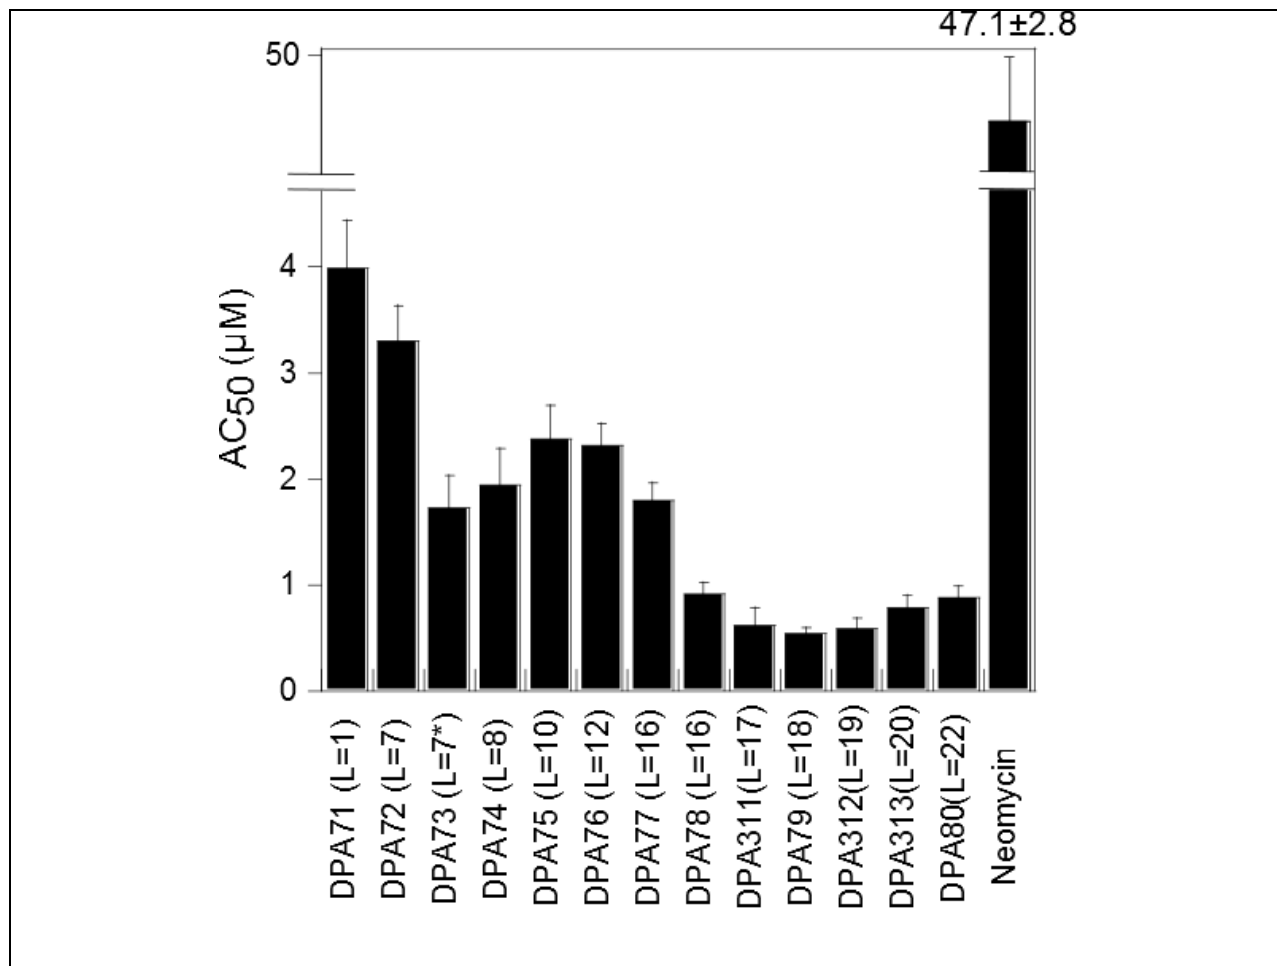

**Figure S69.** Bar graph represents the comparison of AC<sub>50</sub> (concentration of aminoglycoside required for 50% change in fluorescence) values derived from FID assay between indicated ligands and d[5'-A<sub>12</sub>-x-T<sub>12</sub>-3'] at 25 °C. d[5'-A<sub>12</sub>-x-T<sub>12</sub>-3'] = 1 µM/duplex. Buffer condition: 100 mM KCl, 10 mM SC, 0.5 mM EDTA, pH 6.8.
